# Supplementary material for: Total synthesis based on the originally claimed structure of mucosin
Source: Royal Society of Chemistry journal article supplement (doi:10.1039/c6ob01511e), 2016-01-01
Supplement: c6ob01511e1.pdf [file c6ob01511e1.pdf]

# Total synthesis based on the originally claimed structure of mucosin

Harrison C. Gallantree-Smith,<sup>a</sup> Simen G. Antonsen,<sup>a</sup> Carl H. Görbitz,<sup>b</sup> Trond V. Hansen,<sup>a, c</sup> Jens M. J. Nolsøe<sup>\*a</sup> and Yngve H. Stenstrøm<sup>\*a</sup>

<sup>a</sup> Department of Chemistry, Norwegian University of Life Sciences, PO box 5003, 1432 Ås, Norway.

<sup>b</sup> Department of Chemistry, University of Oslo, PO box 1033, 0315 Oslo, Norway

<sup>c</sup> Department of Pharmaceutical Chemistry, University of Oslo, PO box 1068, 0316 Oslo, Norway

\*E-mail: yngve.stenstrom@nmbu.no; jens.mj.nolsoe@nmbu.no

## Supporting Information

### Table of Contents:

|                                                                                                          |     |
|----------------------------------------------------------------------------------------------------------|-----|
| General Information.....                                                                                 | S1  |
| Preparation of <i>meso</i> -ketone <b>4</b> (Scheme S1).....                                             | S3  |
| NMR spectra of compounds in sequential order <b>10</b> , <b>11</b> and <b>4</b> (Figures S1-S6).....     | S5  |
| MS spectra of compounds in sequential order <b>10</b> , <b>11</b> and <b>4</b> (Figures S7-S9).....      | S8  |
| IR spectra of compounds in sequential order <b>10</b> , <b>11</b> and <b>4</b> (Figures S10-S12).....    | S10 |
| Preparation of mucosin ( <b>1</b> ) and the methyl ester <b>2</b> (Scheme S2).....                       | S12 |
| NMR spectra of compounds in sequential order <b>12-19</b> , <b>1</b> and <b>2</b> (Figures S13-S36)..... | S20 |
| MS spectra of compounds in sequential order <b>12-19</b> , <b>1</b> and <b>2</b> (Figures S37-S48).....  | S32 |
| IR spectra of compounds in sequential order <b>12-19</b> , <b>1</b> and <b>2</b> (Figures S49-S60).....  | S38 |
| GLC chromatograms of late stage intermediate <b>16</b> (Figures S61-S64).....                            | S44 |
| Preparation of 3,5-dinitrobenzoate derivative of <b>16</b> (Scheme S3).....                              | S48 |
| NMR spectra of compound 3,5-dinitrobenzoate derivative of <b>16</b> (Figures S65-S66).....               | S49 |
| MS spectrum of compound 3,5-dinitrobenzoate derivative of <b>16</b> (Figure S67).....                    | S50 |
| IR spectrum of compound 3,5-dinitrobenzoate derivative of <b>16</b> (Figure S68).....                    | S51 |
| X-ray crystallography on 3,5-dinitrobenzoate derivative of <b>16</b> (Figure S69 and Table S1).....      | S52 |
| References.....                                                                                          | S60 |

### General Information

All commercially available reagents and solvents were used in the form they were supplied without any further purification. (+)-Bis[(*R*)-1-phenylethyl]amine hydrochloride (optical purity  $\geq 99\%$  *ee* by GLC) was purchased from Sigma-Aldrich. The stated yields are based on isolated material. The melting points are uncorrected. Thin layer chromatography was performed on silica gel 60 F<sub>254</sub> aluminum-backed plates fabricated by Merck. Flash column chromatography was performed on silica gel 60 (40-63  $\mu$ m) fabricated by Merck. NMR spectra were recorded on a Bruker Ascend™ 400 at 400 MHz for <sup>1</sup>H NMR and at 100 MHz for <sup>13</sup>C NMR. Coupling constants (*J*) are reported in hertz and chemical shifts are reported in parts per million ( $\delta$ ) relative to the central residual protium solvent resonance in <sup>1</sup>H NMR (CDCl<sub>3</sub> =  $\delta$  7.27) and the central carbon solvent resonance in <sup>13</sup>C NMR (CDCl<sub>3</sub> =  $\delta$  77.00 ppm). Mass spectra were recorded at 70 eV on Waters Prospec Q spectrometer using EI as the method of ionization. IR spectra (4000–600 cm<sup>-1</sup>) were recorded on a Perkin-Elmer Spectrum BX series FT-IR spectrophotometer using a reflectance cell (HATR). Optical rotations were measured using a 1 mL cell with a 1.0 dm path length on a Perkin Elmer 341 polarimeter using the stated solvents. Determination of enantiomeric excess was performed by GLC on an Agilent Technologies 7820A GC instrument with split (1:30) injection, FID

detector and equipped with a chiral stationary phase (Agilent J&W GC columns, CP-Chirasil-DEX CB, 25 m, 0.25 mm, 0.25  $\mu$ m) applying the conditions stated. X-ray crystallography was performed on a Bruker D8 Venture diffractometer with InCoatec ImuS Microfocus radiation source and Photon 100 CMOS detector. Data collection with Apex2,<sup>1</sup> data integration and cell refinement with SAINT,<sup>1</sup> absorption correction by SADABS,<sup>1</sup> structure solution with SHELXT,<sup>2</sup> structure refinement with SHELXL.<sup>3</sup> Molecular graphics from Mercury.<sup>4</sup>

## Preparation of *meso*-ketone (**4**):

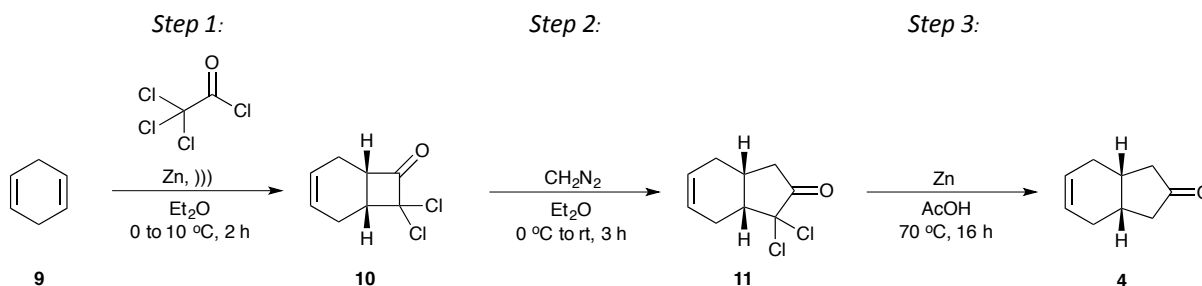

Scheme S-1 Synthetic route to *meso*-ketone **4**.

### *rac*-(1*R*,6*S*)-8,8-Dichlorobicyclo[4.2.0]oct-3-en-7-one (**10**).<sup>5</sup>

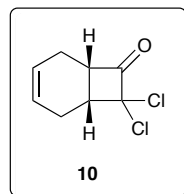

1,4-Cyclohexadiene **9** (5 g, 62.5 mmol, 1.0 equiv.) was added to a suspension of zinc powder (8.2 g, 125 mmol, 2.0 equiv.) in dry Et<sub>2</sub>O (100 mL) and sonicated at 0 °C for 15 min. Then trichloroacetylchloride (22.8 g, 125 mmol, 2.0 equiv.) in dry Et<sub>2</sub>O (100 mL) was added dropwise over 2 h while the reaction mixture was still sonicating. After complete addition the reaction mixture was sonicated for a further 2 h at 0-10 °C. The colour changed from colourless to dark yellow. The sonication was then stopped and the reaction mixture filtered and concentrated *in vacuo*. The resulting orange slurry was diluted in Et<sub>2</sub>O (400 mL) and washed with H<sub>2</sub>O (2 x 400 mL) and sat. aq. NaHCO<sub>3</sub> (1 x 400 mL). The organic layer was dried (MgSO<sub>4</sub>), filtered and concentrated *in vacuo*. The resulting crude dark yellow oil was purified by column chromatography on silica (hexane/EtOAc 99:1) to afford the title compound as a colourless oil. All spectroscopic and physical data were in full agreement with those reported in the literature.<sup>5</sup> Yield: 2.25 g (47%); <sup>1</sup>H NMR (400 MHz, CDCl<sub>3</sub>) δ 5.90-5.81 (m, 2H), 4.07-4.01 (m, 1H), 3.32 (ddt, *J* = 2.0, 7.9, 10.4 Hz, 1H), 2.63-2.50 (m, 2H), 2.39-2.32 (m, 1H), 2.17-2.10 (m, 1H); <sup>13</sup>C NMR (100 MHz, CDCl<sub>3</sub>) δ 198.3, 127.3, 126.3, 88.5, 53.7, 45.2, 23.1, 21.3; IR (neat, cm<sup>-1</sup>) 3041 (w), 2939 (w), 2895 (w), 2841 (w) 1799 (s), 1644 (w), 1433 (m); HRMS (EI<sup>+</sup>): Exact mass calculated for C<sub>8</sub>H<sub>8</sub>OCl<sub>2</sub> [*M*]<sup>+</sup>: 189.9952, found 189.9953; TLC (hexane/EtOAc 4:1, KMnO<sub>4</sub> stain): R<sub>f</sub> = 0.65.

### *rac*-(1*R*,6*R*)-7,7-Dichlorobicyclo[4.3.0]oct-3-en-7-one (**11**).

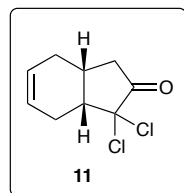

To a stirring solution of *rac*-(1*R*,6*S*)-8,8-dichlorobicyclo[4.2.0]oct-3-en-7-one **10** (2.0 g, 10.5 mmol, 1.0 equiv.) in dry Et<sub>2</sub>O (50 mL), at 0 °C, was added diazomethane (2.5 g, 58.8 mmol, 5.6 equiv.) in dry Et<sub>2</sub>O (50 mL) dropwise over 15 min. The reaction mixture bubbled and turned a deep golden yellow colour. After 30 min the reaction was warmed to room temperature and left to stir for 2 h. The reaction was then quenched with glacial AcOH (5 mL) dropwise until there was no more gas evolution and the colour changed from golden yellow to almost colourless. The resulting mixture was then washed with H<sub>2</sub>O (2 x 300 mL), sat. aq. NaHCO<sub>3</sub> (1 x 300 mL), brine (1 x 300 mL), dried with MgSO<sub>4</sub>, filtered and concentrated *in vacuo*. The resulting dark yellow oil was purified by column chromatography on silica (hexane/EtOAc 9:1) to afford the title compound as a colourless oil. Yield: 1.6 g (75%); <sup>1</sup>H NMR (400 MHz, CDCl<sub>3</sub>) δ: 5.64-5.57 (m, 2H), 2.86-2.80 (m, 1H), 2.74-2.69 (m, 1H), 2.54 (dd, *J* = 7.5, 19.2 Hz, 1H), 2.38-2.29 (m, 2H), 2.07-2.00 (m, 2H), 1.72-1.64 (m, 1H); <sup>13</sup>C NMR (100 MHz, CDCl<sub>3</sub>) δ 201.7, 123.9, 123.1, 89.5, 46.7, 36.6, 28.1, 25.8, 23.5; IR (neat, cm<sup>-1</sup>) 3033 (m), 2916 (m), 2842 (m), 1764 (s) 1662 (w) 1434

(m), 1402 (m); HRMS (EI+): Exact mass calculated for  $C_9H_{10}OCl_2$   $[M]^+$ : 204.0109, found 204.0103; TLC (hexane/EtOAc 4:1,  $KMnO_4$  stain):  $R_f$  = 0.60.

***meso*-(1*S*,6*R*)-Bicyclo[4.3.0]non-3-ene-8-one (4).**<sup>6</sup>

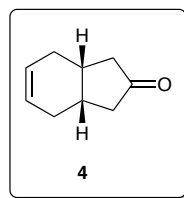

To a stirring suspension of zinc powder (1.71 g, 26.3 mmol, 2.0 equiv.) in glacial AcOH (50 mL) was added *rac*-(1*R*,6*R*)-7,7-dichlorobicyclo[4.2.0]oct-3-en-7-one (**11**) (2.7 g, 13.2 mmol, 1.0 equiv.) in glacial AcOH (30 mL) dropwise. The resulting reaction mixture was stirred for 16 h at 70 °C. The reaction mixture was then cooled to room temperature and filtered to remove the resulting solid. The filtrate was diluted with  $CH_2Cl_2$  (200 mL) and washed with  $H_2O$  (2 x 300 mL), sat. aq.  $NaHCO_3$  (1 x 300 mL), brine (1 x 300 mL), dried with  $MgSO_4$ , filtered and concentrated *in vacuo*. The resulting crude pale yellow oil was purified by column chromatography on silica (hexane/EtOAc 95:5) to give the *meso* compound as a colourless oil. All spectroscopic and physical data were in full agreement with those reported in the literature.<sup>6</sup> Yield: 2.45 g (72%);  $^1H$  NMR (400 MHz,  $CDCl_3$ )  $\delta$  5.70-5.69 (m, 2H), 2.46-2.41 (m, 2H), 2.34-2.25 (m, 4H), 2.10 (dd,  $J$  = 6.4, 18.6 Hz, 2H) 1.89-1.83 (m, 2H);  $^{13}C$  NMR (100 MHz,  $CDCl_3$ )  $\delta$  219.6 124.6 (2C), 44.6 (2C), 32.3 (2C), 26.2 (2C); IR (neat,  $cm^{-1}$ ) 3024 (m), 2834 (m), 2901 (s), 1744 (s), 1655 (w), 1439 (m), 1407 (s); HRMS (EI+): Exact mass calculated for  $C_9H_{12}O$   $[M]^+$ : 136.0888, found 136.0983; TLC (hexane/EtOAc 4:1,  $KMnO_4$  stain):  $R_f$  = 0.51.



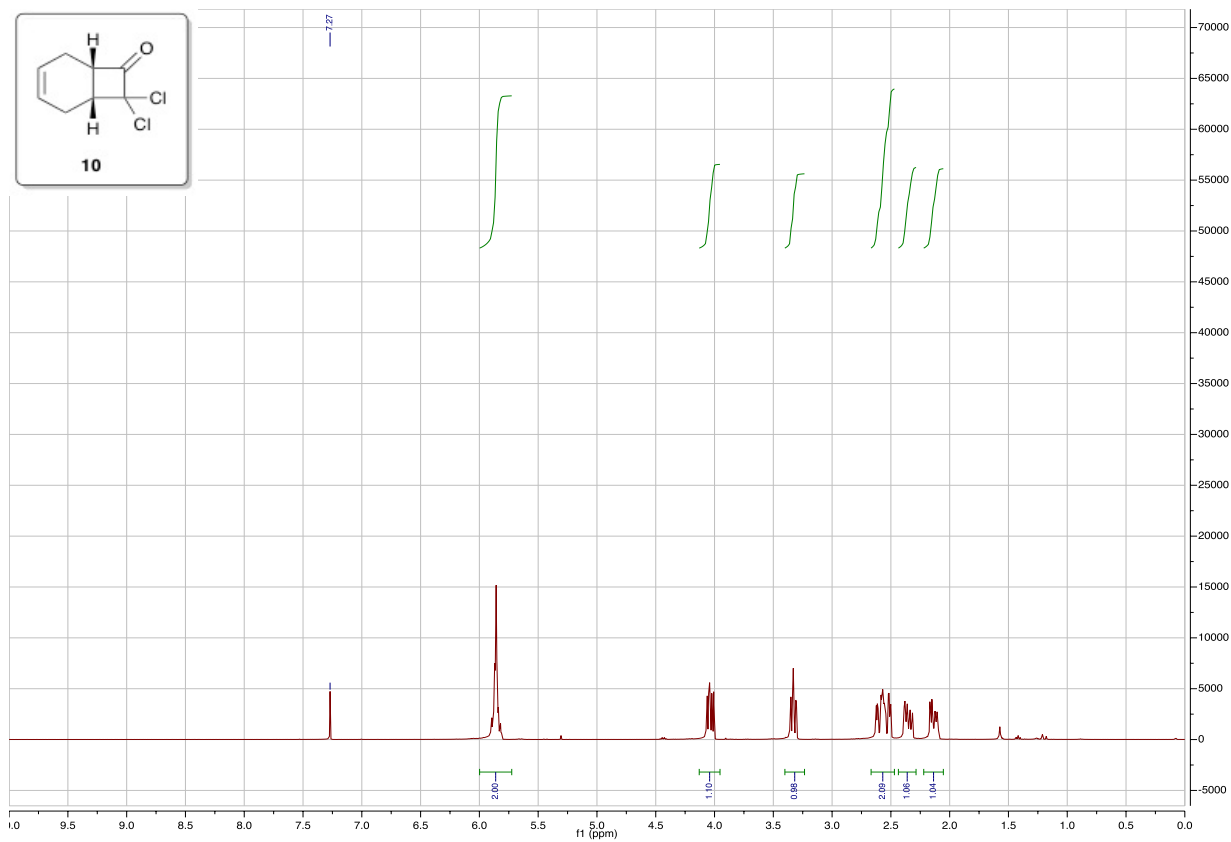

Figure S-1 <sup>1</sup>H-NMR spectrum of compound 10.

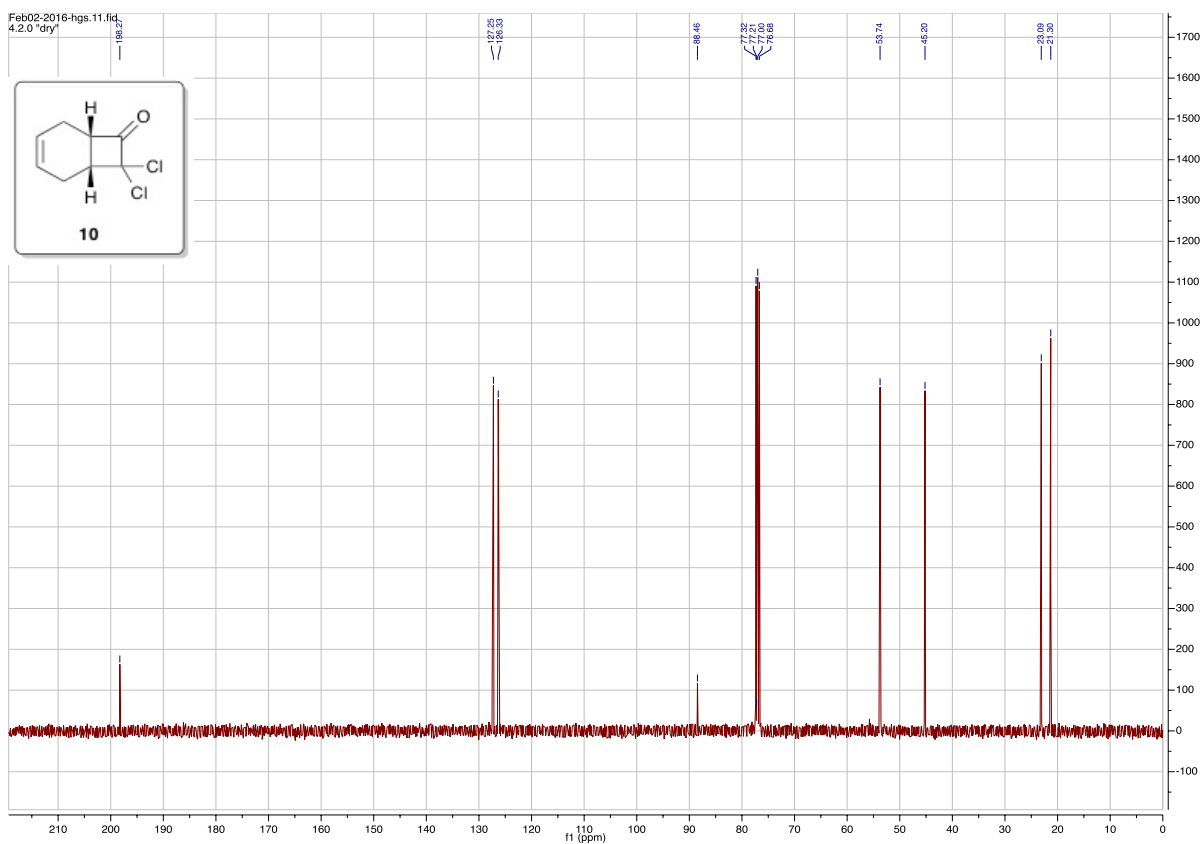

Figure S-2 <sup>13</sup>C-NMR spectrum of compound 10.

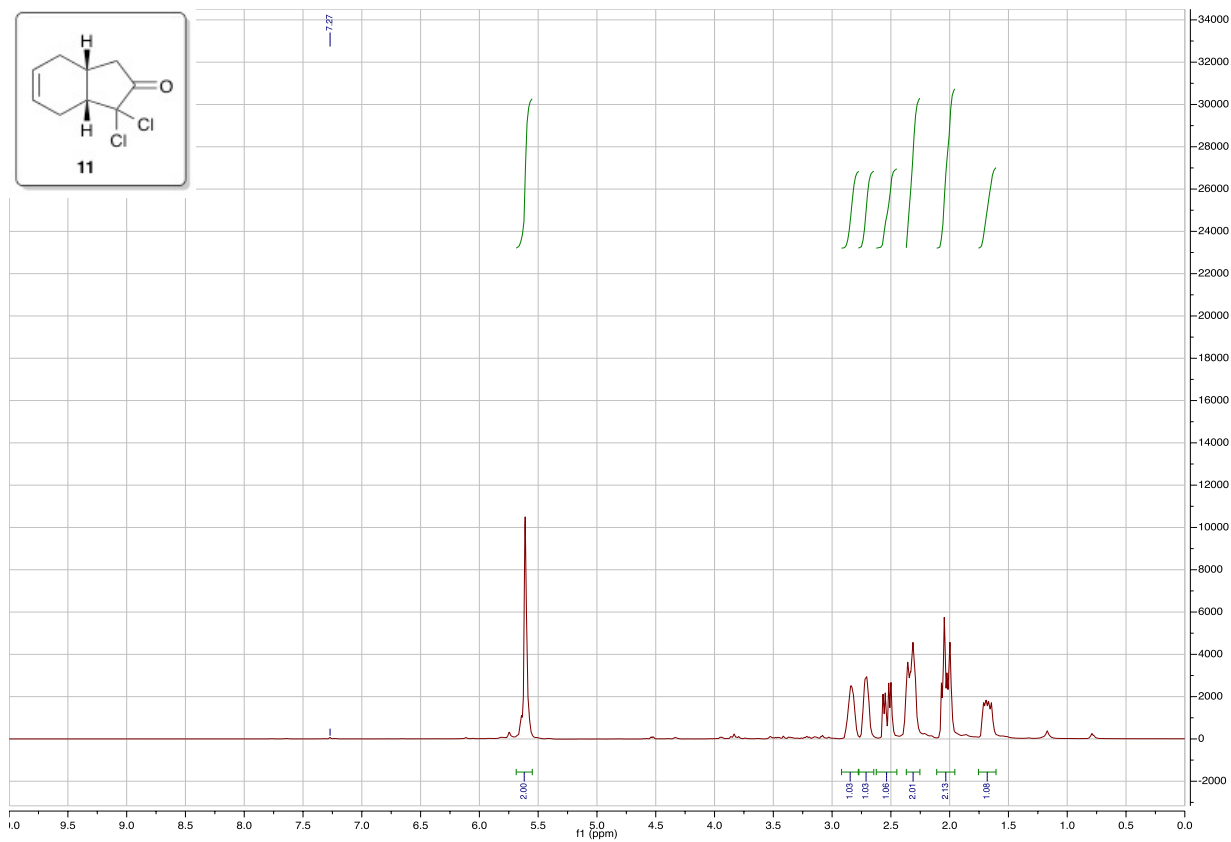

Figure S-3 <sup>1</sup>H-NMR spectrum of compound **11**.

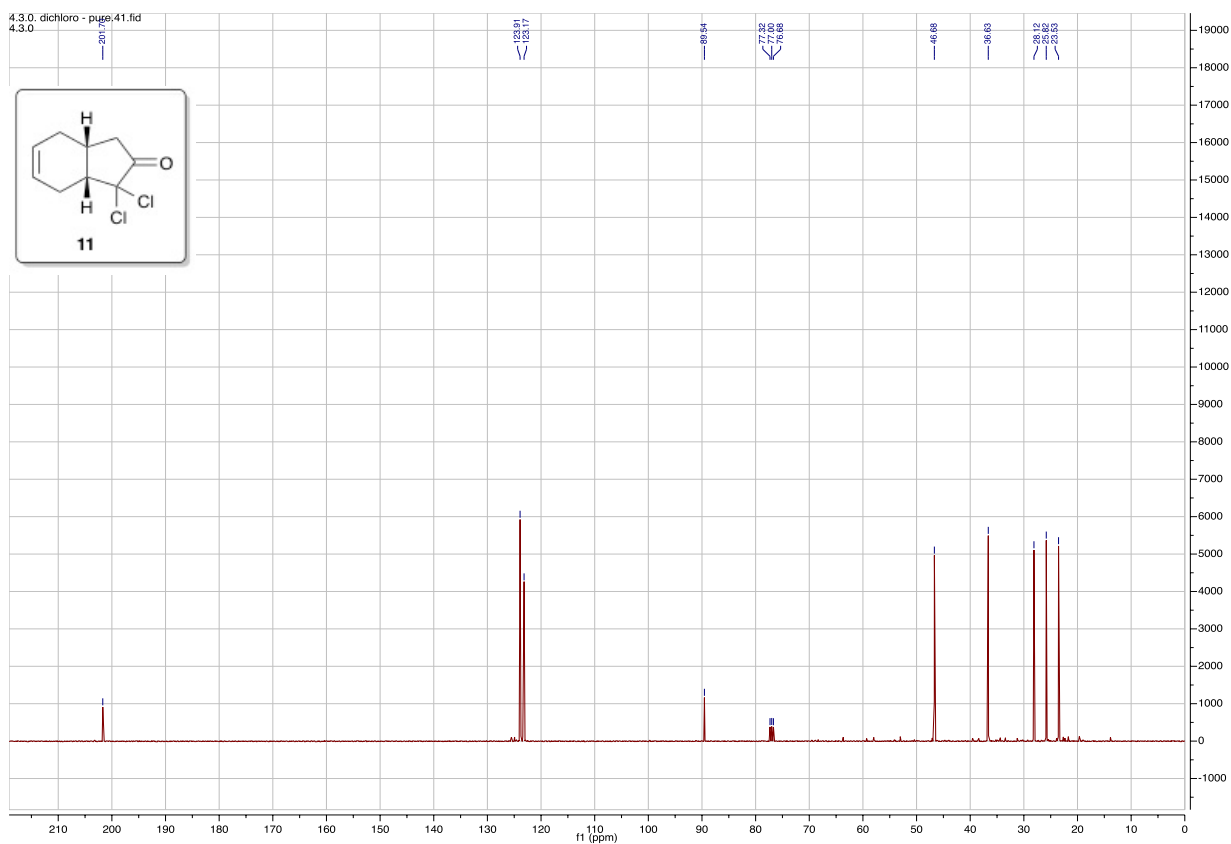

Figure S-4 <sup>13</sup>C-NMR spectrum of compound **11**.

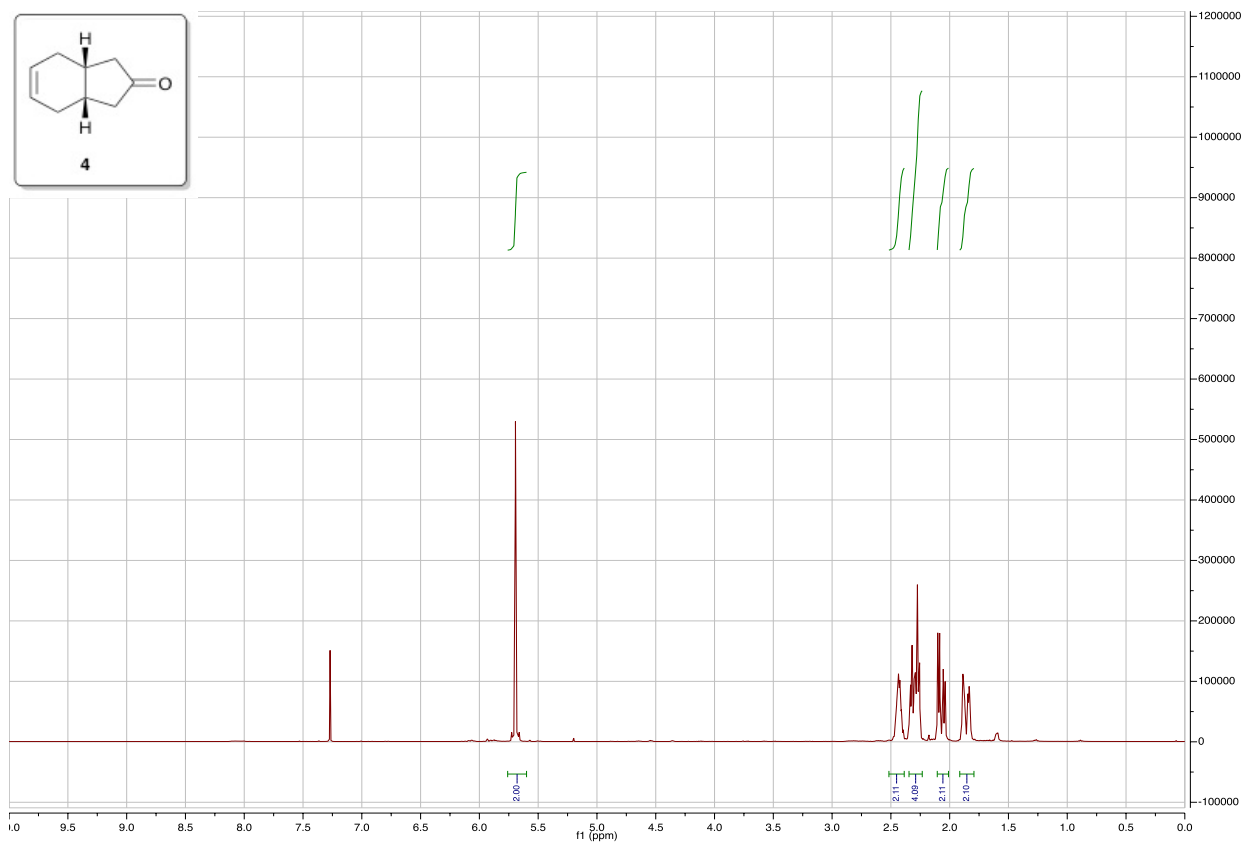

Figure S-5 <sup>1</sup>H-NMR spectrum of compound 4.

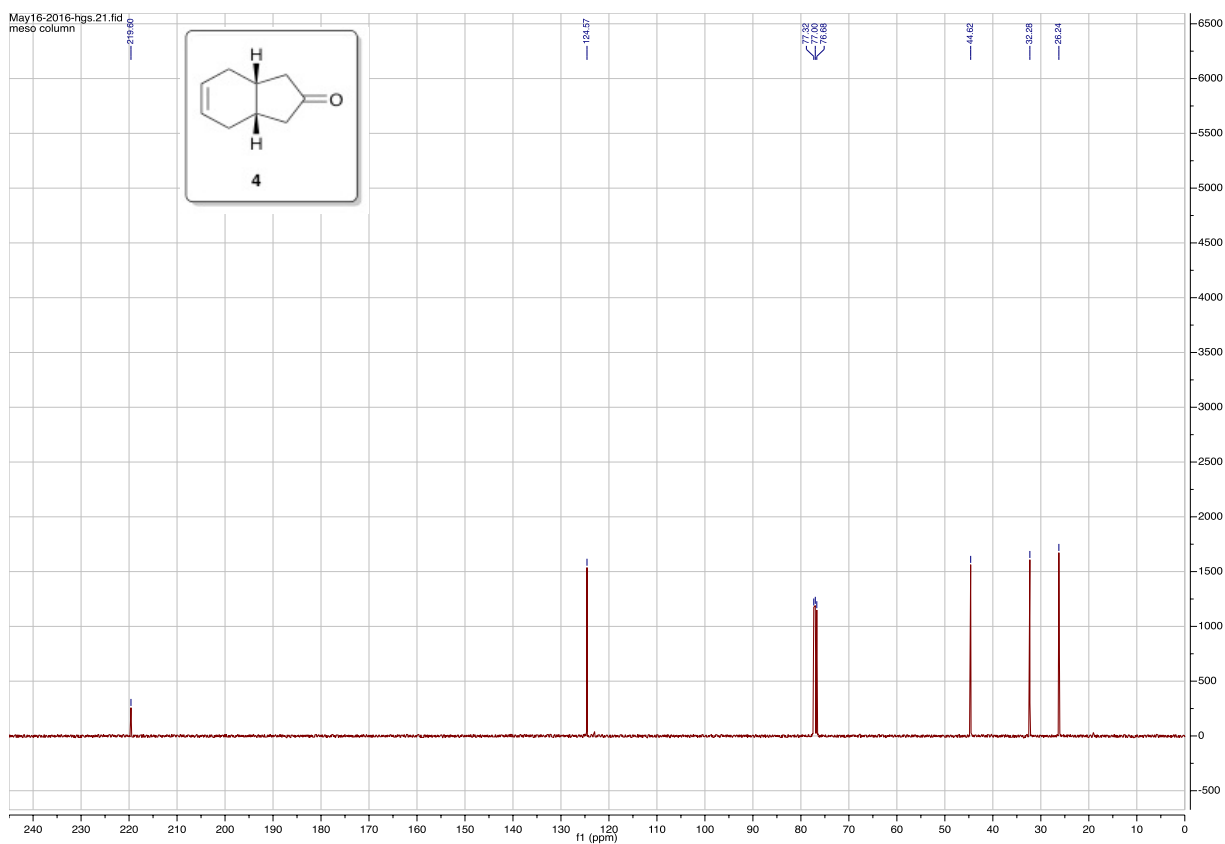

Figure S-6 <sup>13</sup>C-NMR spectrum of compound 4.

## Elemental Composition Report

### Single Mass Analysis

Tolerance = 10.0 PPM / DBE: min = -1.5, max = 50.0

Isotope cluster parameters: Separation = 1.0 Abundance = 1.0%

Monoisotopic Mass, Odd and Even Electron Ions

44 formula(e) evaluated with 1 results within limits (up to 50 closest results for each mass)

Sample 1 C8OCl2H8 MW 191  
DEHGS2016021901 540 (6.602)

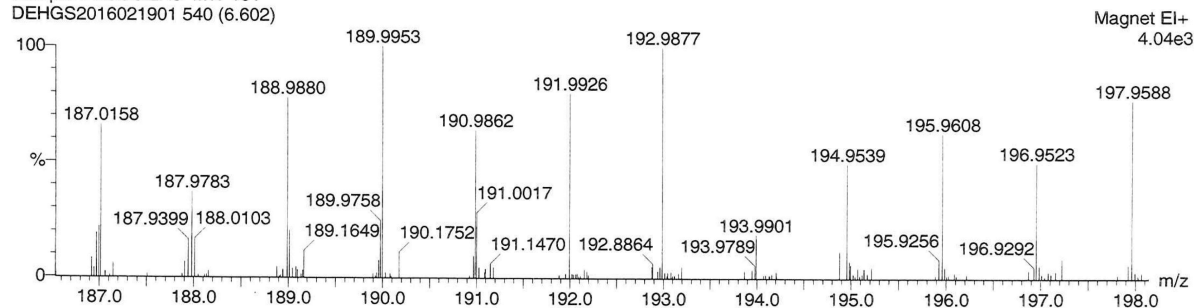

Minimum:

Maximum: 200.0 10.0 -1.5

| Mass     | Calc. Mass | mDa | PPM | DBE | Score | Formula     |
|----------|------------|-----|-----|-----|-------|-------------|
| 189.9953 | 189.9952   | 0.1 | 0.4 | 4.0 | 1     | C8 H8 O Cl2 |

Figure S-7 HRMS of compound 10.

## Elemental Composition Report

### Single Mass Analysis

Tolerance = 10.0 PPM / DBE: min = -1.5, max = 50.0

Isotope cluster parameters: Separation = 1.0 Abundance = 1.0%

Monoisotopic Mass, Odd and Even Electron Ions

48 formula(e) evaluated with 1 results within limits (up to 50 closest results for each mass)

Sample 2 C9H10OCl2 MW 205  
DEHGS2016021902 515 (12.982)

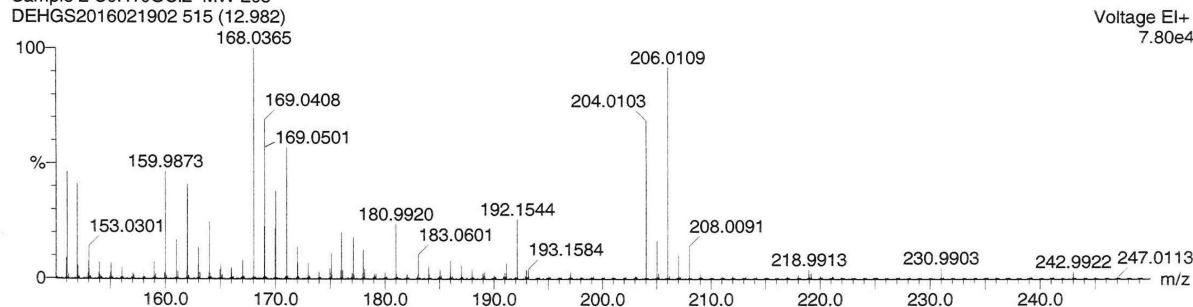

Minimum:

Maximum: 200.0 10.0 -1.5

| Mass     | Calc. Mass | mDa  | PPM  | DBE | Score | Formula      |
|----------|------------|------|------|-----|-------|--------------|
| 204.0103 | 204.0109   | -0.6 | -2.8 | 4.0 | 1     | C9 H10 O Cl2 |

Figure S-8 HRMS of compound 11.

## Elemental Composition Report

Page 1

### Single Mass Analysis

Tolerance = 10.0 PPM / DBE: min = -1.5, max = 50.0

Isotope cluster parameters: Separation = 1.0 Abundance = 1.0%

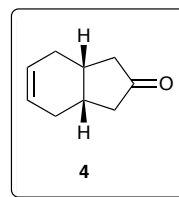

Monoisotopic Mass, Odd and Even Electron Ions

11 formula(e) evaluated with 1 results within limits (up to 50 closest results for each mass)

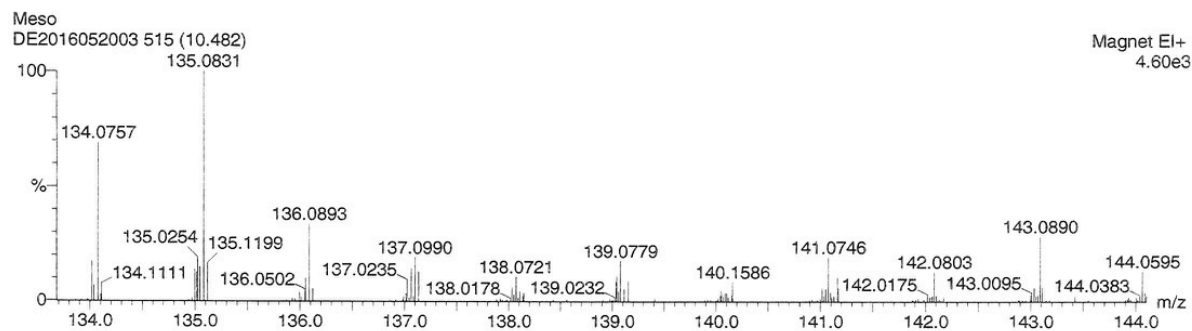

Minimum: -1.5  
Maximum: 200.0 10.0 50.0

| Mass     | Calc. Mass | mDa | PPM | DBE | Score | Formula  |
|----------|------------|-----|-----|-----|-------|----------|
| 136.0893 | 136.0888   | 0.5 | 3.6 | 4.0 | 1     | C9 H12 O |

Figure S-9 HRMS of compound 4.

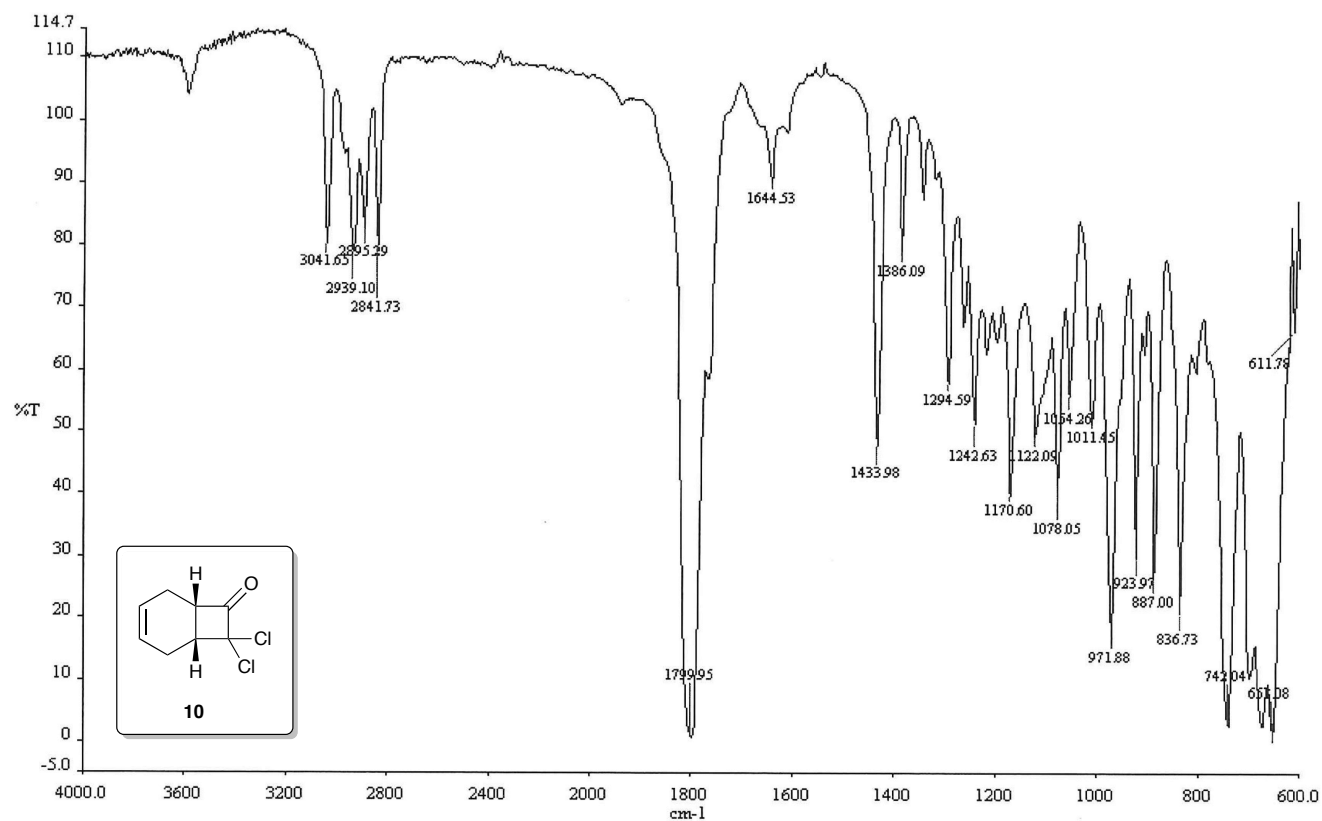

Figure S-10 IR of compound **10**.

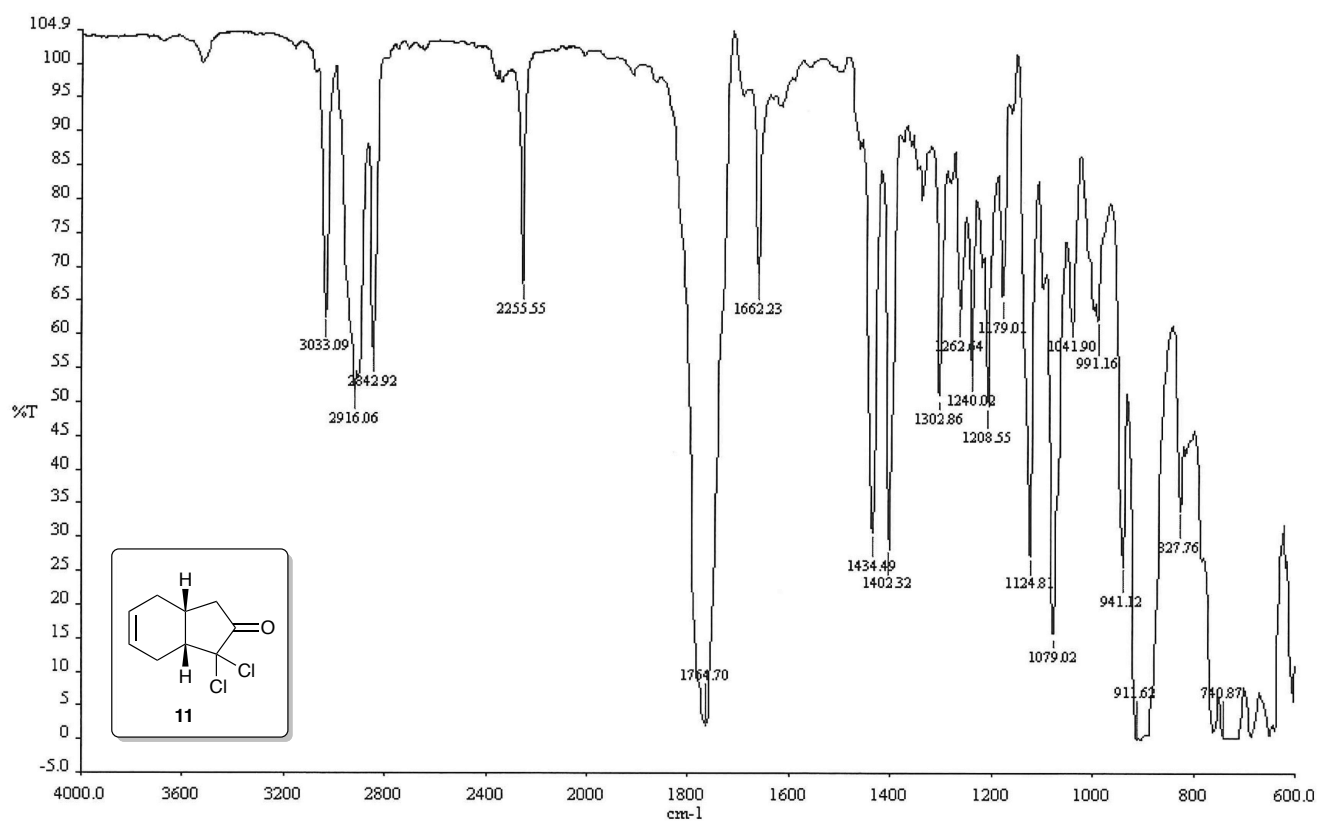

Figure S-11 IR of compound **11**.

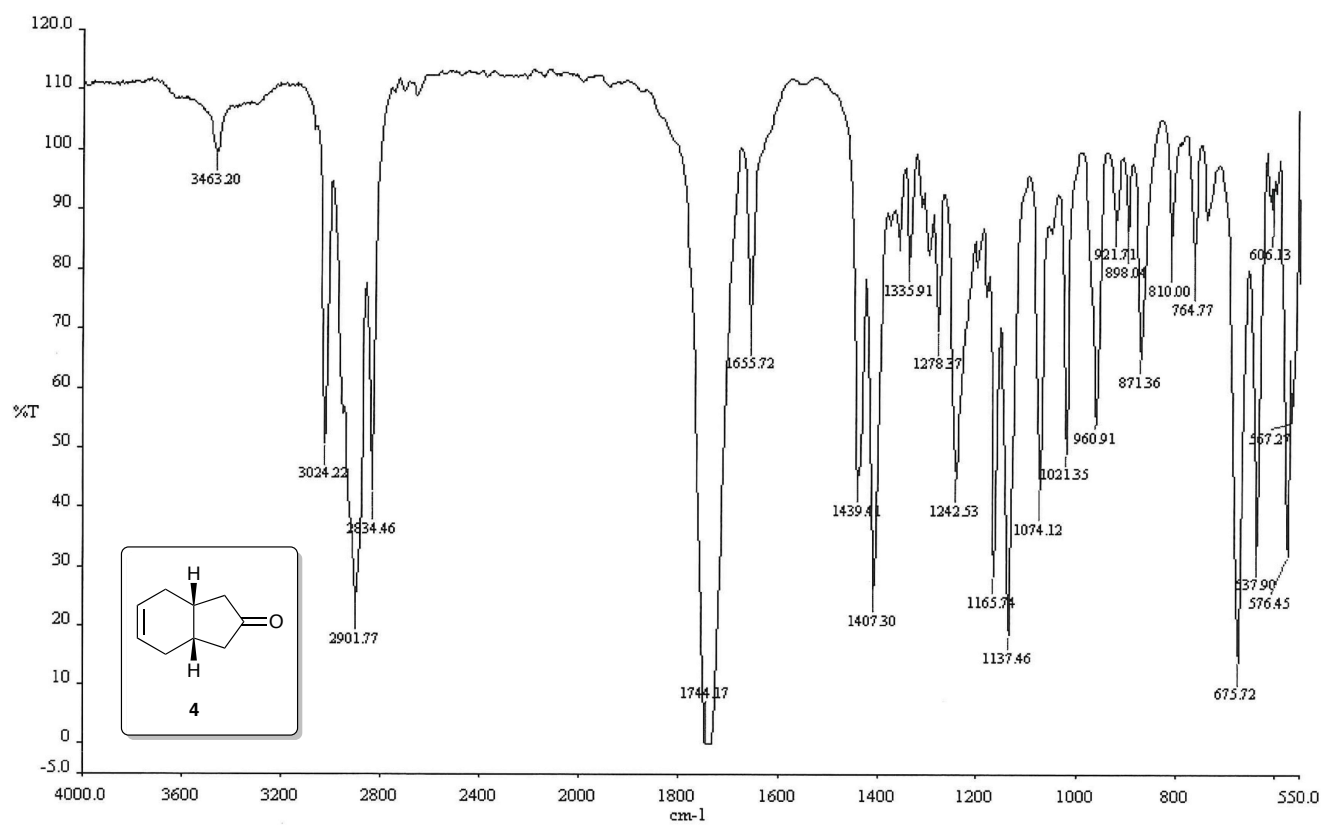

Figure S-12 IR of compound 4.

# Preparation of mucosin (1) and the methyl ester (2):

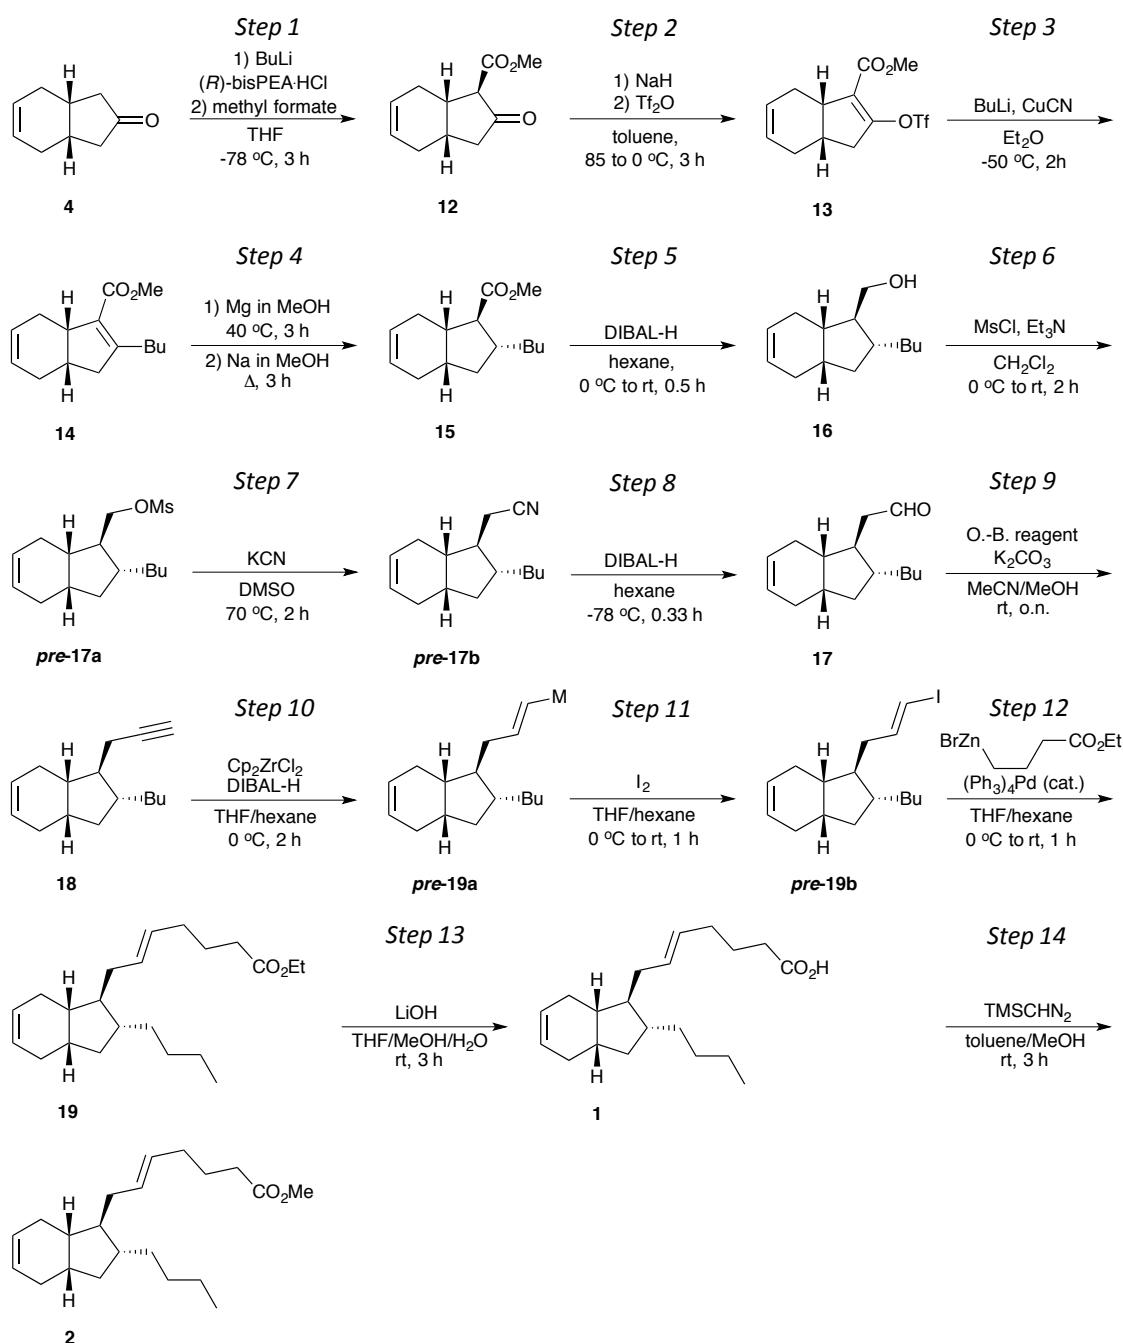

**Scheme S-2** Synthetic route to mucosin (1) and its methyl ester 2.



**Methyl (1*S*,6*S*,7*R*)-8-oxobicyclo[4.3.0]non-3-ene-7-carboxylate (12).<sup>7</sup>**

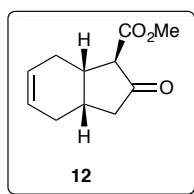

(+)-Bis[(*R*)-1-phenylethyl]amine hydrochloride (2.5 g, 9.60 mmol, 1.6 equiv.) was added in one portion to dry THF (10 mL) at room temperature and stirred for 5 min. The stirring suspension was then cooled to -78 °C and BuLi (2.5 M in hexane, 7.67 mL, 19.2 mmol, 3.2 equiv.) was added dropwise. The suspension changed colour from cloudy white to pale orange. After stirring at -78 °C for 15 min the suspension was warmed to room temperature whereby a transparent yellow solution was formed. This was then cooled to -78 °C again and *meso*-(1*S*,6*R*)-bicyclo[4.3.0]non-3-ene-8-one **4** (826 mg, 6.07 mmol, 1.0 equiv.) was added dropwise over 10 min in dry THF (10 mL). This mixture was then stirred for 45 min whereby a purple colour evolved. Methyl cyanoformate (0.96 mL, 12.1 mmol, 2.0 equiv.) was then added dropwise over 5 min. and the mixture immediately turned bright yellow in colour. This mixture was left stirring for 2.5 h and then quenched by addition of H<sub>2</sub>O (2 mL) at -78 °C. The mixture was then warmed to room temperature and extracted with EtOAc (2 x 50 mL). The resulting organic layer was then washed with H<sub>2</sub>O (2 x 100 mL), 0.5 M HCl (1 x 100 mL) and brine (1 x 100 mL). The organic layer was then dried over MgSO<sub>4</sub>, filtered and concentrated *in vacuo*. The resulting crude keto-ester was purified by column chromatography (hexane/EtOAc 5:1) to form a colourless oil. This oil was then recrystallised from hexane at 0 °C, filtered and air dried to obtain the title compound as white crystals. All spectroscopic and physical data were in full agreement with those reported in the literature.<sup>7</sup> Yield: 812 mg (69%); [ $\alpha$ ]<sub>D</sub><sup>26</sup> -161.2 (c = 1.0, CHCl<sub>3</sub>); <sup>1</sup>H NMR (400 MHz, CDCl<sub>3</sub>)  $\delta$  5.73-5.66 (m, 2H), 3.76 (s, 3H), 3.04 (d, *J* = 11.1 Hz, 1H), 2.88-2.83 (m, 1H), 2.52-2.38 (m, 3H), 2.33-2.21 (m, 2H), 2.04 (dd, *J* = 1.9, 18.2 Hz, 1H), 1.67-1.61 (m, 1H); <sup>13</sup>C NMR (100 MHz, CDCl<sub>3</sub>)  $\delta$  211.6, 169.7, 124.9, 123.9, 57.7, 52.4, 46.6, 37.3, 29.7, 26.8, 25.3; IR (neat, cm<sup>-1</sup>) 3034 (w), 2945 (m), 2908 (m), 2837 (w), 1751 (s), 1718 (s), 1656 (w), 1433 (s), 1404 (m); HRMS (EI<sup>+</sup>): Exact mass calculated for C<sub>11</sub>H<sub>14</sub>O<sub>3</sub> [*M*]<sup>+</sup>: 194.9033, found 194.0943; m.p.: 59-61 °C; TLC (hexane/EtOAc 4:1, KMnO<sub>4</sub> stain): R<sub>f</sub> = 0.42.

***rac*-Methyl (1*S*,6*S*,7*R*)-8-oxobicyclo[4.3.0]non-3-ene-7-carboxylate (12).**

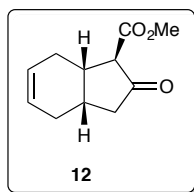

LDA (1M in THF/Hexanes, 1.65 mL, 1.65 mmol, 1.5 equiv.) was added dropwise to dry THF (5 mL) at -78 °C and stirred for 30 min. Then *meso*-(1*S*,6*R*)-bicyclo[4.3.0]non-3-ene-8-one **4** (150 mg, 1.10 mmol, 1.0 equiv.) was added dropwise in dry THF (5 mL) over 5 min and left to stir for 45 min. To the resulting yellow solution was added methyl cyanoformate (0.174 mL, 2.2 mmol, 2.0 equiv.) dropwise over 5 min and the reaction changed from yellow to colourless. After 30 min and monitoring the reaction via TLC the reaction was quenched at -78 °C by sat. aq. NH<sub>4</sub>Cl (2 mL) and the reaction mixture was left to slowly warm to room temperature. The reaction mixture was then poured over H<sub>2</sub>O (1 x 20 mL) and the organic phase separated. The aqueous phase was then extracted with EtOAc (2 x 20 mL). The organic phases were then combined, washed with H<sub>2</sub>O (2 x 50 mL), brine (1 x 50 mL), dried over MgSO<sub>4</sub>, filtered and concentrated *in vacuo* to form a crude yellow oil. This yellow oil was purified by column chromatography on silica (hexane/EtOAc, 5:1) to afford the racemic keto-ester. This was recrystallised in the same fashion as the optically active ketoester to afford pure white crystals. Yield: 166 mg, (78%).

*The material was used in the preparation of racemic reference material for chiral GLC analysis.*

**Methyl (1S,6S)-8-(((trifluoromethyl)sulfonyl)oxy)bicyclo[4.3.0]non-3,7-diene-7-carboxylate (13).**

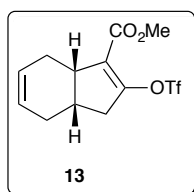

NaH (60% disp. in min. oil, 148 mg, 3.71 mmol, 1.8 equiv.) was added to dry toluene (10 mL). The suspension was stirred for 5 min and then methyl (1S,6S,7R)-8-oxobicyclo[4.3.0]non-3-ene-7-carboxylate **12** (400 mg, 2.06 mmol, 1.0 equiv.), dissolved in dry toluene (7 mL), was added dropwise over 10 min during which bubbling occurred. After the full addition of **12** the reaction mixture was heated to 85 °C for 1.5 h during which time the mixture turned to a brown colour. The reaction mixture was then cooled to 0 °C and the triflic anhydride (0.52 mL, 3.09 mmol, 1.5 equiv.), was added dropwise. The reaction mixture changed colour from brown to a pale yellow/white slurry. After stirring at 0 °C for 1 h and monitoring by TLC the reaction mixture was quenched carefully with H<sub>2</sub>O (10 mL). The resulting mixture was extracted with EtOAc (3 x 50 mL). The combined organic layers were washed with H<sub>2</sub>O (1 x 150 mL), brine (1 x 150 mL), dried over MgSO<sub>4</sub>, filtered and concentrated *in vacuo*. This afforded a brown oil, which was purified by column chromatography on silica (hexane/EtOAc 95:5) to afford the unsaturated triflate as a colourless oil. Yield: 527 mg (83%);  $[\alpha]_D^{26} +100.8$  (c = 1.0, CHCl<sub>3</sub>); <sup>1</sup>H NMR (400 MHz, CDCl<sub>3</sub>) δ 5.95-5.89 (m, 1H), 5.86-5.81 (m, 1H), 3.81 (s, 3H), 3.10 (q, *J* = 6.7 Hz, 1H), 2.84-2.77 (m, 1H), 2.72-2.63 (m, 1H), 2.57-2.42 (m, 2H), 2.34-2.26 (m, 1H), 2.05-1.96 (m, 2H); <sup>13</sup>C NMR (100 MHz, CDCl<sub>3</sub>) δ 162.6, 153.9, 127.9, 127.3, 126.6, 118.3 (q, *J*<sub>CF</sub> = 320 Hz), 51.8, 39.5, 38.9, 32.0, 27.3, 26.2; IR (neat, cm<sup>-1</sup>) 3036 (w), 2953 (m), 2845 (w), 1723 (s), 1662 (m), 1425 (s); HRMS (EI<sup>+</sup>): Exact mass calculated for C<sub>12</sub>H<sub>13</sub>O<sub>5</sub>SF<sub>3</sub> [*M*]<sup>+</sup>: 326.0436, found 326.0438; TLC (hexane/EtOAc 4:1, KMnO<sub>4</sub> stain): R<sub>f</sub> = 0.75.

Following the same procedure as above, racemic synthesis was performed to obtain reference material for chiral GLC analysis.

**Methyl (1S,6S)-8-butylbicyclo[4.3.0]non-3,7-diene-7-carboxylate (14).**

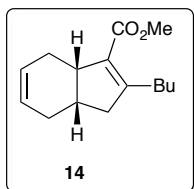

Solid Cu(I)CN (1.45 g, 16.18 mmol, 2.5 equiv.) was added to dry Et<sub>2</sub>O (5 mL) at room temperature. This was stirred for 5 min, cooled to -50 °C and then BuLi (2.5 M in hexane, 6.47 mL, 16.18 mmol, 2.5 equiv.) was added dropwise over 5 min. This mixture was stirred for 1 h at -50 °C and a dark brown suspension occurred. Methyl (1S,6S)-8-(((trifluoromethyl)sulfonyl)oxy)bicyclo[4.3.0]non-3,7-diene-7-carboxylate **13** (1.98 g, 6.47 mmol, 1.0 equiv.) was then added via cannula at -50 °C in dry Et<sub>2</sub>O (5 mL). The reaction changed from a dark brown suspension to black slurry and was left to stir for 1 h whilst monitoring by TLC. Once the reaction was finished sat. aq. NH<sub>4</sub>Cl (5 mL) was added dropwise. The reaction turned from black to dark purple and was left to warm to room temperature. The subsequent ethereal slurry was filtered through celite and the celite filter washed with EtOAc (3 x 15 mL). The organic layer was then separated and the aqueous layer extracted with EtOAc (2 x 15 mL). The organic layers were then combined, washed with H<sub>2</sub>O (1 x 100 mL), brine (1 x 100 mL), dried over MgSO<sub>4</sub>, filtered and concentrated *in vacuo*. This afforded a crude yellow oil, which was purified by column chromatography in silica (hexane/EtOAc 98:2) to afford the unsaturated butyl diene as a colourless oil. Yield: 1.33 g (88%);  $[\alpha]_D^{26} +124.5$  (c = 3.0, CHCl<sub>3</sub>); <sup>1</sup>H NMR (400 MHz, CDCl<sub>3</sub>) δ 5.88-5.83 (m, 1H), 5.79-5.73 (m, 1H), 3.72 (s, 3H), 2.94 (q, *J* = 7.6 Hz, 1H), 2.64-2.54 (m, 1H), 2.52-2.38 (m, 4H), 2.32-2.23 (m, 2H), 1.97-1.90 (m, 1H), 1.84-1.77 (m, 1H), 1.46-1.28 (m, 4H), 0.91 (t, *J* = 7.2 Hz, 3H); <sup>13</sup>C NMR (100 MHz, CDCl<sub>3</sub>) δ 166.6, 159.9, 132.5, 127.9, 126.4, 50.8, 43.7, 42.3, 34.2, 30.1, 29.8, 27.5, 27.2, 22.7, 13.9; IR (neat, cm<sup>-1</sup>) 3025 (w), 2926 (s), 1709 (s), 1630

(w), 1433 (s); HRMS (EI<sup>+</sup>): Exact mass calculated for C<sub>15</sub>H<sub>22</sub>O<sub>2</sub> [M]<sup>+</sup>: 234.1620, found 234.1628; TLC (hexane/EtOAc 9:1, KMnO<sub>4</sub> stain): R<sub>f</sub> = 0.85.

Following the same procedure as above, racemic synthesis was performed to obtain reference material for chiral GLC analysis.

**Methyl (1S,6S,7S,8R)-8-butylbicyclo[4.3.0]non-3-ene-7-carboxylate (15).**

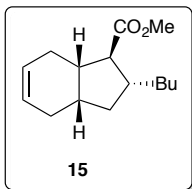

1) Methyl (1S,6S)-8-butylbicyclo[4.3.0]non-3,7-diene-7-carboxylate **14** (1.33 g, 5.68 mmol, 1.0 equiv.) was dissolved in MeOH (5 mL) at room temperature. This was stirred for 5 min then magnesium turnings (3.75 g, 156 mmol, 28 equiv.) were added in one portion. The turnings were stirred at room temperature for 10 min and then heated to 40 °C. A violent reaction occurs with lots of bubbling. After all the magnesium turnings had been consumed the addition of 27.5 equiv. of magnesium turnings in one portion was repeated at 40 °C. After 3 h the reaction was then cooled to room temperature to give a white cloudy mixture. Glacial AcOH (5mL) was added dropwise until the cloudy suspension had dissolved to leave a colourless solution. The reaction mixture was then concentrated *in vacuo* to leave a white slurry, which was poured over EtOAc/H<sub>2</sub>O 1:1 (100 mL). The organic phase was separated and the aqueous layer was extracted again with EtOAc (2 x 50 mL). The organic phases were combined and washed with sat. aq. NaHCO<sub>3</sub> (1 x 100 mL), brine (1 x 100 mL), dried over MgSO<sub>4</sub>, filtered and concentrated *in vacuo*, to give a crude product. This crude product was analysed by <sup>1</sup>H and <sup>13</sup>C NMR to show the reaction had gone to completion by the formation of two unconjugated diastereomeric esters in a 2:1 ratio, no further purification was carried out. The crude diastereomeric esters were then equilibrated with NaOMe as shown below.

2) To MeOH (10 mL) at room temperature was added sodium metal (760 mg, 33.1 mmol, 6.0 equiv.). This was left to stir until all the sodium metal had dissolved. The crude diastereomeric esters were then added dropwise in MeOH (5 mL) and the reaction mixture was heated to 70 °C and monitored by TLC. After 3 h the reaction had gone to completion, was cooled to room temperature and concentrated *in vacuo* but not to dryness. The crude mixture was then poured over Et<sub>2</sub>O (50 mL) and H<sub>2</sub>O (50 mL). The organic layer was separated and the aqueous layer was extracted with Et<sub>2</sub>O (2 x 50 mL). The organic layers were then combined, washed with H<sub>2</sub>O (1 x 50 mL), brine (1 x 50 mL), dried over MgSO<sub>4</sub>, filtered and concentrated *in vacuo* to form a crude yellow oil. This crude yellow oil was purified by column chromatography on silica (hexane/EtOAc 98:2) to give the title compound as a colourless oil. Yield: 1.24 g (93%); [ $\alpha$ ]<sub>D</sub><sup>26</sup> -4.32 (c = 2.0, CHCl<sub>3</sub>); <sup>1</sup>H NMR (400 MHz, CDCl<sub>3</sub>)  $\delta$  5.73-5.66 (m, 2H), 3.69 (s, 3H), 2.32-2.22 (m, 1H) 2.22-2.14 (m, 5H), 2.09-2.02 (m, 1H), 1.91-1.77 (m, 2H), 1.54-1.49 (m, 1H), 1.36-1.21 (m, 5H), 1.15-1.09 (m, 1H), 0.87 (t, J = 6.8 Hz, 3H); <sup>13</sup>C NMR (100 MHz, CDCl<sub>3</sub>)  $\delta$  177.2, 126.3, 125.5, 55.5, 51.5, 42.7, 41.2, 38.3, 36.9, 35.4, 30.6, 28.0, 26.5, 22.8, 14.0; IR (neat, cm<sup>-1</sup>) 3024 (m), 2927 (s), 2856 (s), 1726 (s), 1657 (w), 1628 (w), 1541 (w), 1520 (w), 1458 (m), 1434 (s); HRMS (EI<sup>+</sup>): Exact mass calculated for C<sub>15</sub>H<sub>24</sub>O<sub>2</sub> [M]<sup>+</sup>: 236.1776, found 236.1783; TLC (hexanes/EtOAc 9:1, KMnO<sub>4</sub> stain): R<sub>f</sub> = 0.85.

Following the same procedure as above, racemic synthesis was performed to obtain reference material for chiral GLC analysis.

**(1S,6S,7S,8R)-8-Butyl-7-(hydroxymethyl)bicyclo[4.3.0]non-3-ene (16).**

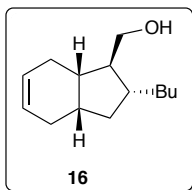

Methyl (1S,6S,7S,8R)-8-butylbicyclo[4.3.0]non-3-ene-7-carboxylate **15** (1.24 g, 5.25 mmol, 1.0 equiv.) was dissolved in hexane (20 mL) at room temperature and stirred for 5 min. The solution was then cooled to 0 °C and DIBAL-H (1 M in hexane, 10.5 mL, 10.51 mmol, 2.0 equiv.) was added dropwise over 5 min. The reaction was then left to warm to room temperature. After 30 min the reaction was cooled back to 0 °C and quenched with sat. aq. NH<sub>4</sub>Cl (6 mL). The reaction mixture was allowed to warm to room temperature whereby a cloudy suspension occurred. This suspension was poured over sat. aq. NH<sub>4</sub>Cl (30 mL) and the organic layer separated. The aqueous layer was extracted with EtOAc (2 x 25 mL) and the organic layers combined, washed with H<sub>2</sub>O (1 x 100 mL), brine (1 x 100 mL), dried over MgSO<sub>4</sub>, filtered and concentrated *in vacuo* to give a crude cloudy oil. This was then purified by column chromatography on silica (hexane/EtOAc 95:5) to afford the title compound as a colourless oil. Yield: 1.01 g, (93%);  $[\alpha]_D^{26}$  -10.33 (*c* = 8.0, CHCl<sub>3</sub>); <sup>1</sup>H NMR (400 MHz, CDCl<sub>3</sub>) δ 5.70-5.64 (m, 2H), 3.61-3.52 (m, 2H), 2.24-2.03 (m, 3H), 1.92-1.81 (m, 4H), 1.57-1.42 (m, 4H), 1.33-1.22 (m, 5H), 1.18-1.11 (m, 1H), 0.89 (t, *J* = 7.2 Hz, 3H); <sup>13</sup>C NMR (100 MHz, CDCl<sub>3</sub>) δ 126.0, 125.8, 65.7, 54.0, 41.0, 37.8, 37.7, 37.4, 35.0, 31.0, 27.7, 27.3, 22.9, 14.1; IR (neat, cm<sup>-1</sup>) 3316 (br.), 3020 (m), 2918 (s), 1657 (m), 1464 (m), 1433 (m); HRMS (EI<sup>+</sup>): Exact mass calculated for C<sub>14</sub>H<sub>24</sub>O [*M*-H<sub>2</sub>O]<sup>+</sup>: 190.1722, found 190.1723; TLC (hexane/EtOAc 4:1, KMnO<sub>4</sub> stain): R<sub>f</sub> = 0.35. The enantiomeric excess was determined by chiral GLC analysis (CP-Chirasil-DEX CB, using the following program: 80 °C (30 min) - 3 degrees/min to 150 °C - 150 °C (5 min)): *t*<sub>r</sub>(*e*<sub>1</sub>, major) = 38.97 min and *t*<sub>r</sub>(*e*<sub>2</sub>, minor) = 39.95 min; *ee*: > 99%.

Following the same procedure as above, racemic synthesis was made to obtain reference material for chiral GLC analysis.

**(1S,6S,7S,8R)-8-Butyl-7-((methanesulfonyl)oxymethyl)bicyclo[4.3.0]non-3-ene (pre-17a).**

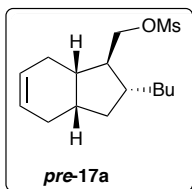

To a stirring solution of (1S,6S,7S,8R)-8-butyl-7-(hydroxymethyl)bicyclo[4.3.0]non-3-ene **16** (1.01 g, 4.81 mmol, 1.0 equiv.) in dry CH<sub>2</sub>Cl<sub>2</sub> (10 mL) at room temperature, was added Et<sub>3</sub>N (1.34 mL, 9.62 mmol, 2.0 equiv.) dropwise. This solution was left stirring for 5 min then cooled to 0 °C. Then methanesulfonyl chloride (1.12 mL, 14.43 mmol, 3.0 equiv.) was added dropwise and the reaction was left at 0 °C for 10 min then warmed to room temperature and left for 2 h. The reaction mixture turned colourless to yellow. After 2 h brine (5 mL) was added dropwise and the volatiles concentrated *in vacuo* to afford a yellow liquid. This was poured over EtOAc (50 mL) and sat. aq. NaHCO<sub>3</sub> (50 mL) was added. The organic layer was separated and the aqueous layer extracted with EtOAc (2 x 50 mL). The organic layers were combined and washed with brine (1 x 50 mL), dried over MgSO<sub>4</sub>, filtered and concentrated *in vacuo* to afford a crude yellow oil. This was then purified by column chromatography on silica (hexane/EtOAc 95:5) to afford the title compound as a colourless oil. Yield: 1.30 g, (94%);  $[\alpha]_D^{26}$  -11.65 (*c* = 8.0, CHCl<sub>3</sub>); <sup>1</sup>H NMR (400 MHz, CDCl<sub>3</sub>) δ 5.69-5.62 (m, 2H), 4.18-4.10 (m, 2H), 2.99 (s, 3H), 2.24-2.07 (m, 3H), 1.94-1.79 (m, 4H), 1.68-1.50 (m, 3H), 1.33-1.22 (m, 5H), 1.19-1.12 (m, 1H), 0.88 (t, *J* = 6.6 Hz, 3H); <sup>13</sup>C NMR (100 MHz, CDCl<sub>3</sub>) δ 126.0, 125.2, 72.0, 50.3, 40.9, 38.0, 37.5, 37.2, 36.8, 34.9, 30.7, 27.2, 27.1, 22.7, 14.0; IR (neat, cm<sup>-1</sup>) 3024 (w), 2926 (s), 1657 (w), 1464 (m), 1435 (w); HRMS (EI<sup>+</sup>): Exact mass calculated for C<sub>15</sub>H<sub>26</sub>O<sub>3</sub>S<sub>2</sub> [*M*]<sup>+</sup>: 286.1603, found 286.1606; TLC (hexane/EtOAc 4:1, KMnO<sub>4</sub> stain): R<sub>f</sub> = 0.45.

**(1S,6S,7S,8R)-8-Butyl-7-(cyanomethyl)bicyclo[4.3.0]non-3-ene (pre-17b).**

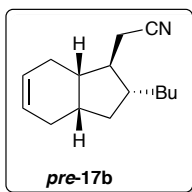

To a stirring solution of (1S,6S,7S,8R)-8-butyl-7-((methylsulfonyl)oxymethyl)bicyclo[4.3.0]non-3-ene **pre-17a** (1.30 g, 4.55 mmol, 1.0 equiv.) in dry DMSO (10 mL) was added solid KCN (1.77 g, 27.3 mmol, 6.0 equiv.) in one portion. The reaction mixture was then heated to 70 °C for 2 h. The reaction mixture changed from colourless to yellow. After 2 h the reaction was cooled to room temperature and H<sub>2</sub>O (5 mL) was added dropwise. The reaction mixture turned from yellow to colourless. This was then poured over EtOAc (20 mL) and the organic layer separated. The aqueous layer was then extracted with EtOAc (2 x 20 mL) and the organic layers combined. They were then washed with brine (1 x 50 mL), dried over MgSO<sub>4</sub>, filtered and concentrated *in vacuo* to afford a crude brown oil. This was then purified by column chromatography on silica (hexane/EtOAc 98:2) to give the title compound as a colourless oil. Yield: 906 mg, (92 %);  $[\alpha]_D^{26}$  -19.15 (c = 8.0, CHCl<sub>3</sub>); <sup>1</sup>H NMR (400 MHz, CDCl<sub>3</sub>) δ 5.73-5.65 (m, 2H), 2.41 (d, *J* = 6.7 Hz, 2H), 2.27-2.14 (m, 3H), 2.04-1.96 (m, 1H), 1.93-1.76 (m, 3H), 1.67-1.49 (m, 3H), 1.36-1.19 (m, 5H), 1.15-1.08 (m, 1H), 0.90 (t, *J* = 6.8 Hz, 3H) <sup>13</sup>C NMR (100 MHz, CDCl<sub>3</sub>) δ 126.5, 125.4, 119.0, 46.4, 43.9, 41.3, 37.9, 36.0, 34.6, 30.6, 27.9, 26.3, 22.8, 21.0, 14.0; IR (neat, cm<sup>-1</sup>) 3024 (m), 2921 (s), 1658 (w), 1465 (m) 1436 (m); HRMS (EI<sup>+</sup>): Exact mass calculated for C<sub>15</sub>H<sub>23</sub>N [M]<sup>+</sup>: 217.1830, found 217.1827; TLC (hexane/EtOAc 4:1, KMnO<sub>4</sub> stain): R<sub>f</sub> = 0.82.

**(1S,6S,7S,8R)-8-Butyl-7-(formylmethyl)bicyclo[4.3.0]non-3-ene (17).**

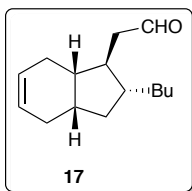

A stirring solution of (1S,6S,7S,8R)-8-butyl-7-(cyanomethyl)bicyclo[4.3.0]non-3-ene **pre-17b** (906 mg, 4.18 mmol, 1.0 equiv.) in hexane (10 mL) was cooled to -78 °C. Then DIBAL-H (1M in hexane, 6.26 mL, 6.26 mmol, 1.5 equiv.) was added dropwise over 5 min and the reaction left to stir for 20 min. Then sat. aq. Rochelle salt (5 mL) was added dropwise to the reaction mixture and then left to warm to room temperature. The resulting cloudy suspension was poured over EtOAc (20 mL) and sat. aq. Rochelle salt (20 mL). The organic layer was separated and the aqueous phase extracted with EtOAc (2 x 20 mL). The organic phases were combined and washed with brine (1 x 50 mL), dried over MgSO<sub>4</sub>, filtered and concentrated *in vacuo* to afford a crude cloudy oil. This was then purified by column chromatography on silica (hexane/EtOAc, 95:5) to afford the aldehyde as a colourless oil. Yield: 813 mg, (88%);  $[\alpha]_D^{26}$  -14.40 (c = 8.0, CHCl<sub>3</sub>); <sup>1</sup>H NMR (400 MHz, CDCl<sub>3</sub>) δ 9.77 (t, *J* = 2.5 Hz, 1H), 5.71-5.64 (m, 2H), 2.44 (dd, *J* = 2.5, 6.5 Hz, 2H), 2.22-2.08 (m, 3H), 1.96-1.91 (m, 1H), 1.89-1.67 (m, 4H), 1.55-1.49 (m, 2H), 1.33-1.15 (m, 5H), 1.13-1.08 (m, 1H), 0.88 (t, *J* = 7.1 Hz, 3H); <sup>13</sup>C NMR (100 MHz, CDCl<sub>3</sub>) δ 203.0, 126.3, 125.6, 49.5, 45.3, 45.0, 41.8, 37.9, 36.4, 34.9, 30.8, 27.7, 27.1, 22.8, 14.0; IR (neat, cm<sup>-1</sup>) 3023 (m), 2923 (s), 2718 (m), 1720 (s), 1657 (w), 1465 (m), 1434 (m); HRMS (EI<sup>+</sup>): Exact mass calculated for C<sub>15</sub>H<sub>24</sub>O [M]<sup>+</sup>: 220.1827, found 220.1828; TLC (hexane/EtOAc 4:1, KMnO<sub>4</sub> stain): R<sub>f</sub> = 0.82.

**(1S,6S,7S,8R)-8-Butyl-7-(prop-2'-yn-1'-yl)bicyclo[4.3.0]non-3-ene (18).**

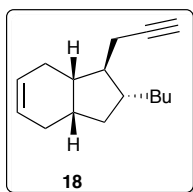

To a stirring solution of (1S,6S,7S,8R)-8-Butyl-7-(formylmethyl)bicyclo[4.3.0]non-3-ene **17** (300 mg, 1.36 mmol, 1.0 equiv.) in dry MeOH (15 mL) at 0 °C was added solid K<sub>2</sub>CO<sub>3</sub> (451 mg, 3.27 mmol, 2.4 equiv.) in one portion and Ohira-Bestmann reagent (10% w/w in MeCN, 4.9 mL, 3.9 g, 2.05 mmol, 1.5 equiv.). The suspension was then warmed to room temperature and left stirring overnight. After analysis by TLC the mixture was treated with sat. aq. NaHCO<sub>3</sub> (20 mL), and the resulting mixture poured over CH<sub>2</sub>Cl<sub>2</sub> (20 mL). The organic phase was separated and the aqueous phase was washed with CH<sub>2</sub>Cl<sub>2</sub> (3 x 10 mL). The organic phases were then combined, dried over Na<sub>2</sub>SO<sub>4</sub>, filtered and concentrated *in vacuo* to afford a crude oil. This was purified by column chromatography on silica (hexane/EtOAc, 95:5) to afford title compound as a colourless oil. Yield: 253 mg, (86%);  $[\alpha]_D^{26}$  -16.95 (c = 8.0, CHCl<sub>3</sub>); <sup>1</sup>H NMR (400 MHz, CDCl<sub>3</sub>) δ 5.73-5.66 (m, 2H), 2.28 (dd, *J* = 2.6, 5.9 Hz, 2H), 2.23-2.08 (m, 3H), 1.97-1.79 (m, 5H), 1.70-1.53 (m, 2H), 1.44-1.38 (m, 1H), 1.36-1.16 (m, 5H), 1.13-1.06 (m, 1H), 0.90 (t, *J* = 6.7 Hz, 3H); <sup>13</sup>C NMR (100 MHz, CDCl<sub>3</sub>) δ; 126.4, 126.0, 83.6, 68.6, 49.0, 43.5, 40.6, 38.2, 36.6, 34.8, 30.9, 28.1, 27.0, 22.9, 22.3, 14.1; IR (neat, cm<sup>-1</sup>) 3310 (m), 3021 (m), 2954 (s), 2915 (s), 1657 (w), 1465 (m), 1435 (m); HRMS (EI<sup>+</sup>): Exact mass calculated for C<sub>16</sub>H<sub>24</sub> [*M*]<sup>+</sup>: 216.1878, found 216.1870; TLC (hexane, KMnO<sub>4</sub> stain and anisaldehyde dip): R<sub>f</sub> = 0.24.

**(1S,6S,7S,8R)-8-Butyl-7-((E)-7'-ethoxy-7'-oxohept-2'-enyl)bicyclo[4.3.0]non-3-ene (19).**

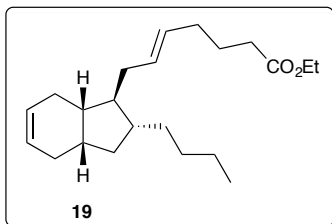

To a stirring solution of Cp<sub>2</sub>ZrCl<sub>2</sub> (95 mg, 0.324 mmol, 2.0 equiv.) in dry THF (2 mL) at 0 °C was added DIBAL-H (1M in hexane, 0.32 mL, 0.324 mmol, 2.0 equiv.) via dropwise addition. The resulting homogenous mixture was then protected from light and stirred at 0 °C for 1 h after which time a colourless heterogeneous mixture formed. Then (1S,6S,7S,8R)-8-butyl-7-(prop-2'-yn-1'-yl)bicyclo[4.3.0]non-3-ene **18** (35 mg, 0.162 mmol, 1.0 equiv.) dissolved in dry THF (2 mL) was added dropwise to the reaction mixture at 0 °C. After 1 h at 0 °C iodine (63 mg, 0.248 mmol, 1.5 equiv.) was added in one portion to the homogeneous yellow reaction mixture. The reaction mixture was then warmed to room temperature and stirred for 1 h. To the preformed vinyl iodide was successively added 4-ethoxy-4-oxobutylzinc bromide solution (0.5M in THF) (0.648 mL, 0.324 mmol, 2.0 equiv.) dropwise and (Ph<sub>3</sub>P)<sub>4</sub>Pd (19 mg, 0.016 mmol, 0.01 equiv.) in one portion. The resulting tea brown mixture was stirred at room temperature for 1 h and monitored by TLC. Once the reaction had gone to completion 1M HCl (10 mL) was added dropwise and the reaction poured over Et<sub>2</sub>O (15 mL). The aqueous phase was extracted with Et<sub>2</sub>O (3 x 15 mL) and the organic phases combined, dried over MgSO<sub>4</sub>, filtered and concentrated *in vacuo* to form a crude brown oily mixture. This oily mixture was purified by column chromatography on silica (hexane/EtOAc, 95:5) to afford the title compound as a colourless oil. Yield: 27 mg, (51%);  $[\alpha]_D^{26}$  -11.15 (c = 2.0, CHCl<sub>3</sub>); <sup>1</sup>H NMR (400 MHz, CDCl<sub>3</sub>) δ 5.70-5.64 (m, 2H), 5.47-5.33 (m, 2H), 4.13 (q, *J* = 7.1 Hz, 2 H), 2.29 (t, *J* = 7.5 Hz, 2H), 2.22-2.15 (m, 1H), 2.12- 2.01 (m, 6H), 1.89-1.76 (m, 3H), 1.73-1.66 (m, 3H), 1.53-1.47 (m, 2H), 1.34-1.16 (m, 9H), 1.12-1.04 (m, 1H), 0.88 (t, *J* = 6.8 Hz, 3H); <sup>13</sup>C NMR (100 MHz, CDCl<sub>3</sub>) δ 173.8, 130.3, 129.9, 126.2, 126.1, 60.2, 51.0, 44.0, 40.3, 38.1, 37.7, 37.1, 34.9, 33.7, 31.9 31.0, 27.8, 27.7, 24.8, 22.9, 14.2, 14.1; IR (neat, cm<sup>-1</sup>) 3021 (m), 2920 (s), 1734 (s), 1657 (w), 1438 (m); HRMS (EI<sup>+</sup>): Exact mass calculated for C<sub>22</sub>H<sub>36</sub>O<sub>2</sub> [*M*]<sup>+</sup>: 332.2715, found 332.2722; TLC (hexane/EtOAc 95:5, KMnO<sub>4</sub> stain): R<sub>f</sub> = 0.65.

**(1S,6S,7S,8R)-8-Butyl-7-((E)-7'-hydroxy-7'-oxohept-2'-enyl)bicyclo[4.3.0]non-3-ene (1).**

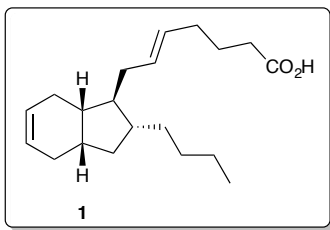

To a stirring solution of the (1S,6S,7S,8R)-8-butyl-7-((E)-7'-ethoxy-7'-oxohept-2'-enyl)bicyclo[4.3.0]non-3-ene **18** (27 mg, 0.081 mmol, 1.0 equiv.) in THF/MeOH/H<sub>2</sub>O (2:2:1) (5 mL) at room temperature was added lithium hydroxide monohydrate (119 mg, 2.84 mmol, 35.0 equiv.) in one portion. The reaction mixture was left stirring and monitored by TLC. After 3 h the reaction had gone to completion and was acidified to pH 2 by 1M HCl (5 mL). The reaction mixture was then poured over EtOAc (5 mL) and the aqueous phase extracted with EtOAc (3 x 5 mL). The organic phases were then combined and washed with brine (1 x 20 mL), dried over MgSO<sub>4</sub>, filtered and concentrated *in vacuo* to form a colourless oil. This was then purified by column chromatography on silica (hexane/EtOAc, 3:2) to afford the title compound as a colourless oil. Yield: 24 mg, (97%);  $[\alpha]_D^{26}$  -10.19 (c = 2.0, CHCl<sub>3</sub>); <sup>1</sup>H NMR (400 MHz, CDCl<sub>3</sub>) δ 11.24 (br, 1H), 5.71-5.64 (m, 2H), 5.48-5.33 (m, 2H), 2.35 (t, *J* = 7.5 Hz, 2H), 2.23-2.14 (m, 1H), 2.13-2.02 (m, 6H), 1.89-1.75 (m, 3H), 1.73-1.65 (m, 3H), 1.55-1.44 (m, 2H), 1.36-1.15 (m, 6H), 1.12-1.05 (m, 1H), 0.89 (t, *J* = 6.7 Hz, 3H); <sup>13</sup>C NMR (100 MHz, CDCl<sub>3</sub>) δ 180.3, 130.6, 129.7, 126.2, 126.0, 51.0, 44.0, 40.3, 38.1, 37.7, 37.1, 34.9, 33.3, 31.8, 31.0, 27.8, 27.7, 24.4, 22.9, 14.1; IR (neat, cm<sup>-1</sup>) 3021 (m), 2920 (s), 1708 (s), 1457 (m), 1436 (m), 1412 (m); HRMS (EI<sup>+</sup>): Exact mass calculated for C<sub>20</sub>H<sub>32</sub>O<sub>2</sub> [*M*]<sup>+</sup>: 304.2402, found 304.2391; TLC (hexane/EtOAc 3:2, KMnO<sub>4</sub> stain): R<sub>f</sub> = 0.40.

**(1S,6S,7S,8R)-8-Butyl-7-((E)-7'-methoxy-7'-oxohept-2'-enyl)bicyclo[4.3.0]non-3-ene (2).**

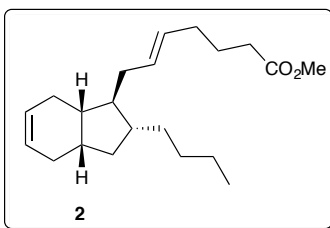

To a stirring solution of (1S,6S,7S,8R)-8-butyl-7-((E)-7'-hydroxy-7'-oxohept-2'-enyl)bicyclo[4.3.0]non-3-ene **1** (24 mg, 0.079 mmol, 1.0 equiv.) in toluene/MeOH (3:2) (5 mL) at room temperature was added TMS diazomethane solution (2M in hexane) (0.06 mL, 0.119 mmol, 1.5 equiv.) dropwise over 2 min. The reaction mixture bubbled and turned transparent yellow. The reaction was monitored by TLC and after 1 h had gone to completion. The reaction mixture was then concentrated *in vacuo* and directly purified by column chromatography on silica (hexane/EtOAc, 95:5) to afford the title compound as a colourless oil. Yield: 23 mg, (92%);  $[\alpha]_D^{26}$  -9.8 (c = 0.8, hexane); <sup>1</sup>H NMR (400 MHz, CDCl<sub>3</sub>) δ 5.70-5.64 (m, 2H), 5.46-5.33 (m, 2H), 3.67 (s, 3H), 2.31 (t, *J* = 7.6 Hz, 2H), 2.22-2.15 (m, 1H), 2.12-2.01 (m, 6H), 1.89-1.75 (m, 3H), 1.73-1.65 (m, 3H), 1.54-1.44 (m, 2H), 1.34-1.16 (m, 6H), 1.12-1.04 (m, 1H), 0.88 (t, *J* = 6.9 Hz, 3H); <sup>13</sup>C NMR (100 MHz, CDCl<sub>3</sub>) δ; 174.2, 130.4, 129.9, 126.3, 126.1, 51.4, 51.0, 44.0, 40.3, 38.1, 37.7, 37.1, 34.9, 33.4, 31.9, 31.0, 27.8, 27.7, 24.8, 22.9, 14.1; IR (neat, cm<sup>-1</sup>) 3020 (w), 2952 (m), 2923 (s), 1741 (s), 1657 (w), 1603 (w), 1541 (w), 1508 (w), 1458 (m), 1436 (m); HRMS (EI<sup>+</sup>): Exact mass calculated for C<sub>21</sub>H<sub>34</sub>O<sub>2</sub> [*M*]<sup>+</sup>: 318.2559, found 318.2544; TLC (hexane/EtOAc 95:5, KMnO<sub>4</sub> stain): R<sub>f</sub> = 0.65.

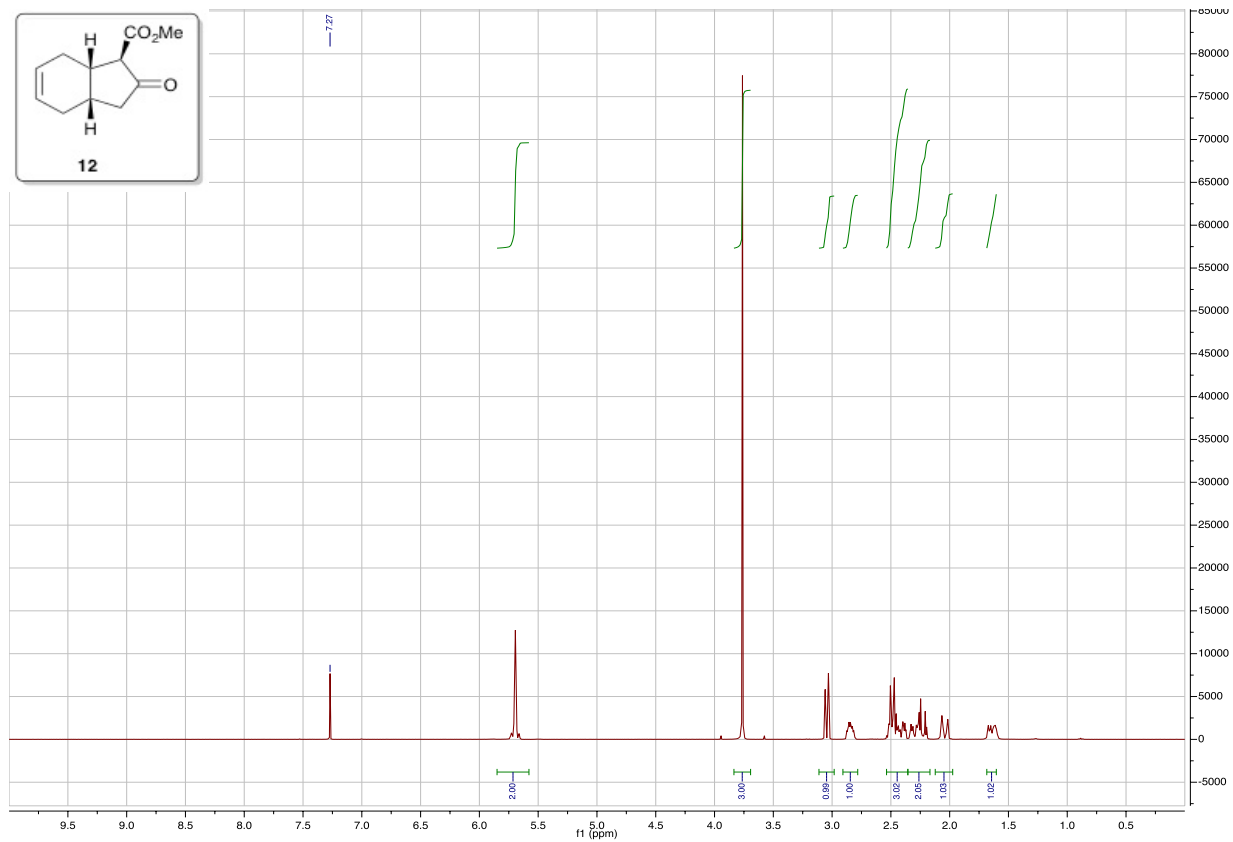

Figure S-13 <sup>1</sup>H-NMR spectrum of compound 12.

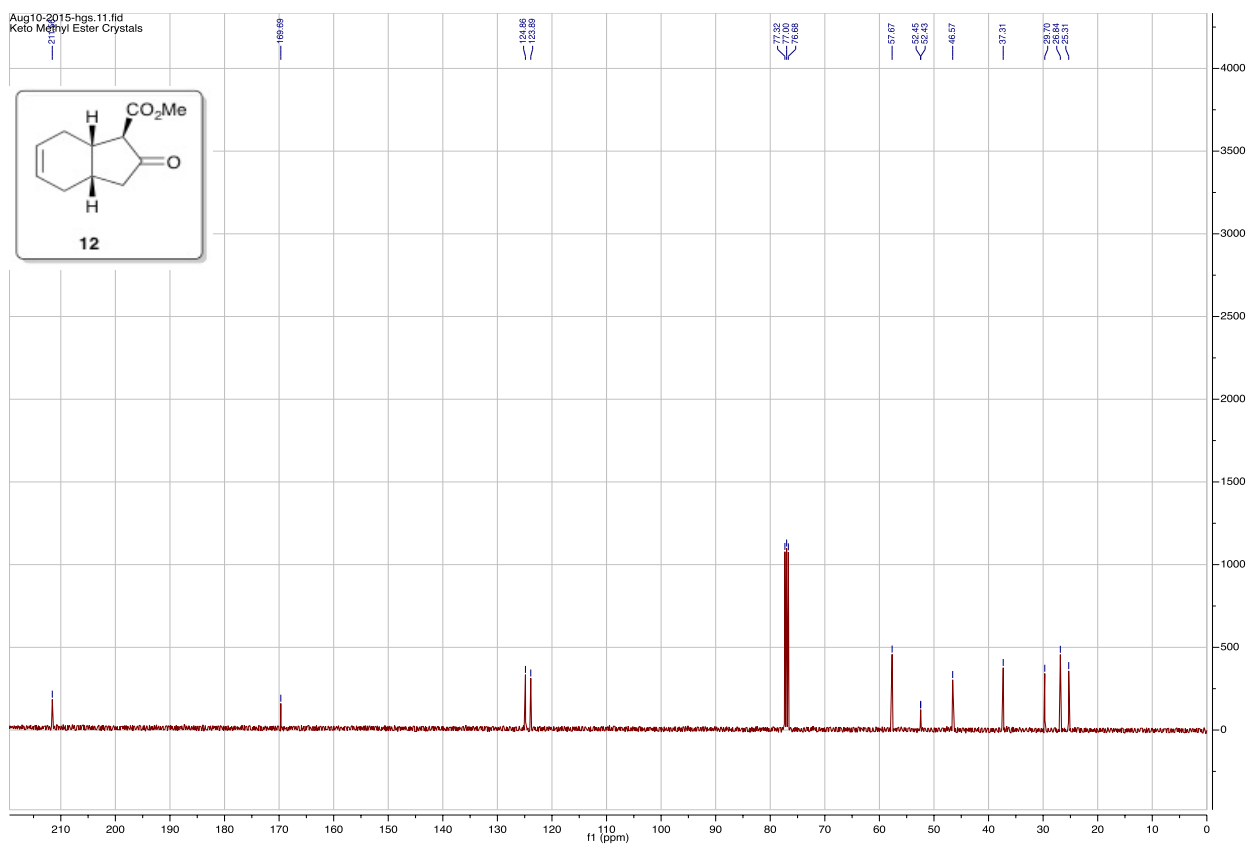

Figure S-14 <sup>13</sup>C-NMR spectrum of compound 12.



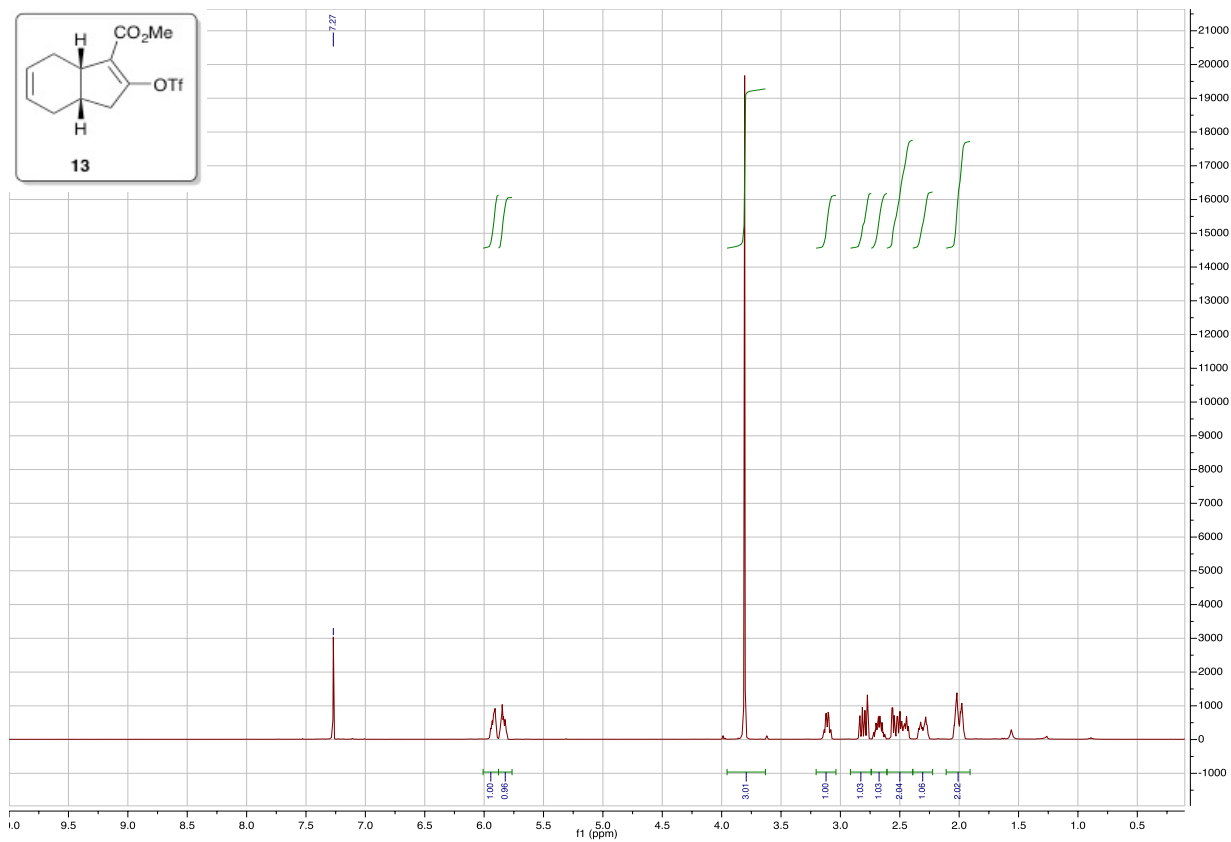

Figure S-15 <sup>1</sup>H-NMR spectrum of compound **13**.

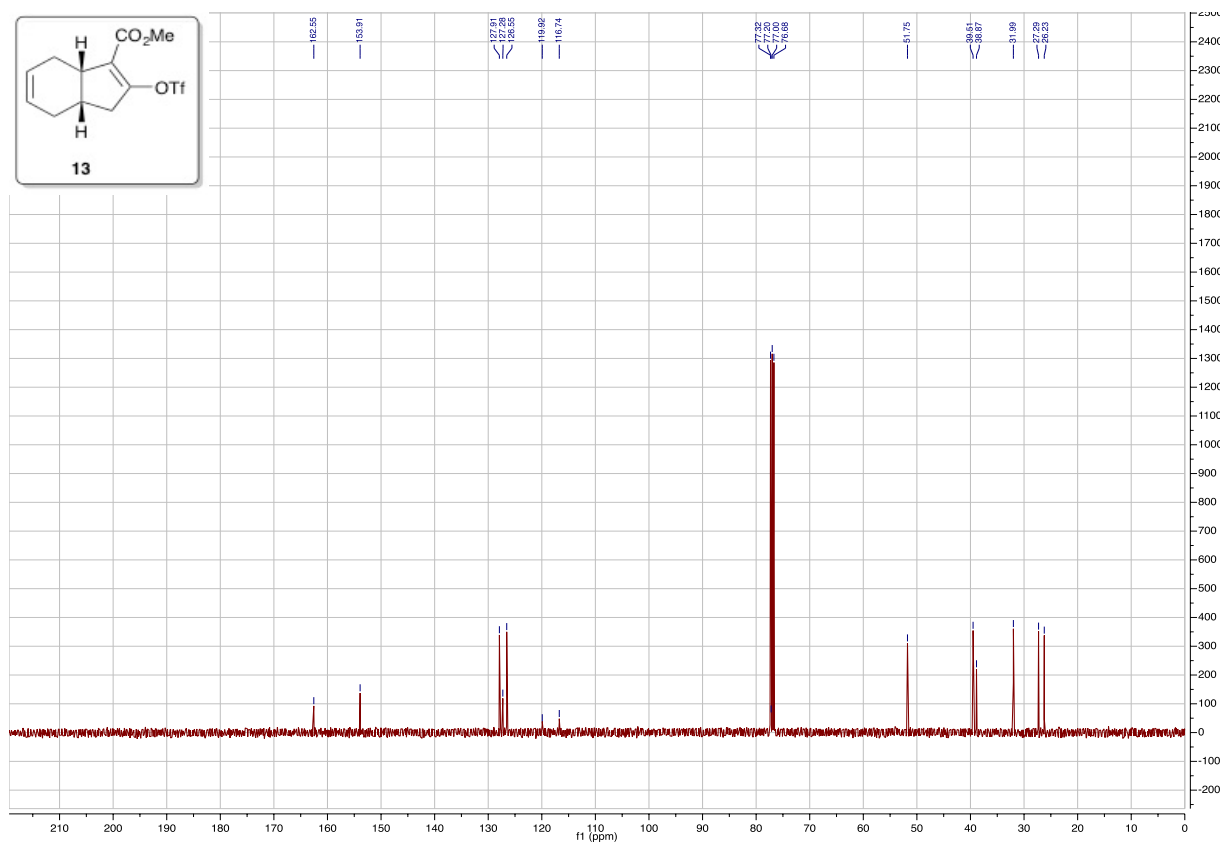

Figure S-16 <sup>13</sup>C-NMR spectrum of compound **13**.

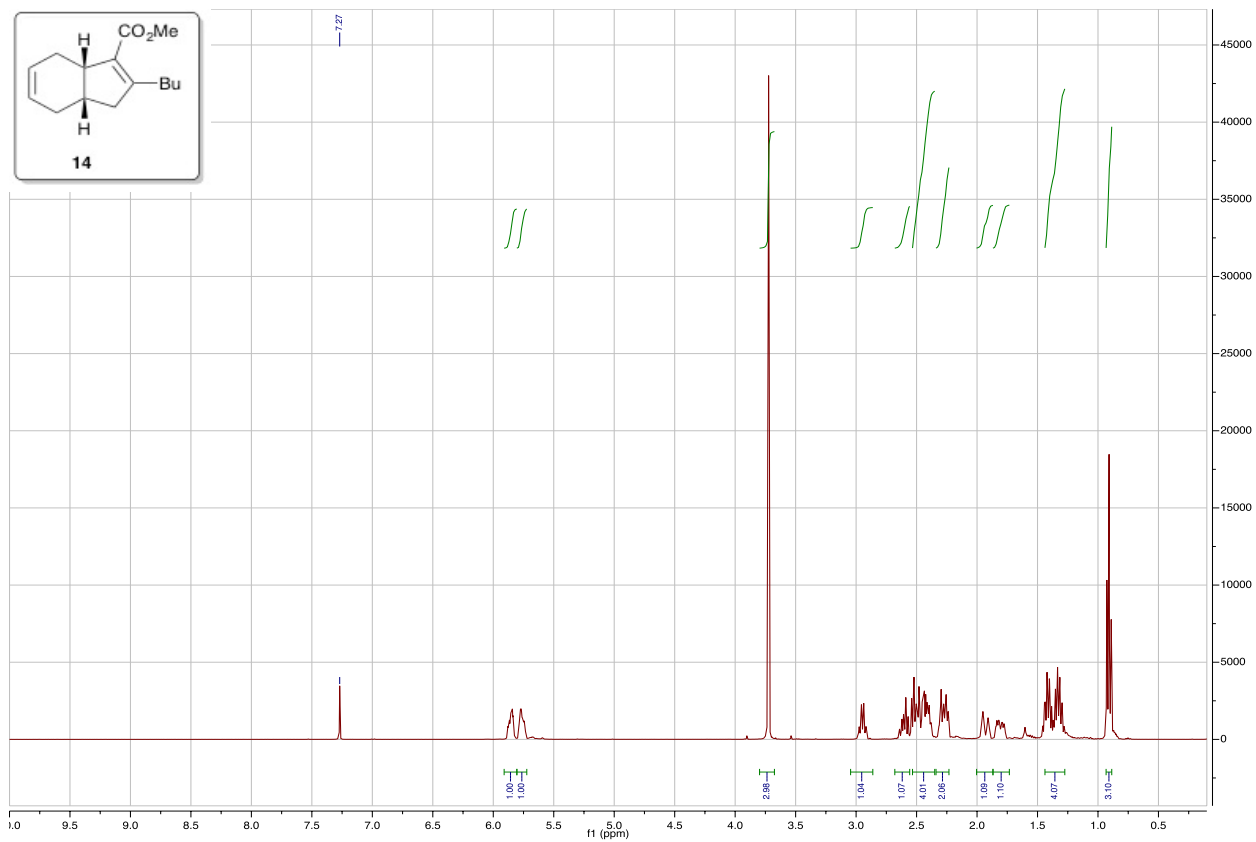

Figure S-17 <sup>1</sup>H-NMR spectrum of compound **14**.

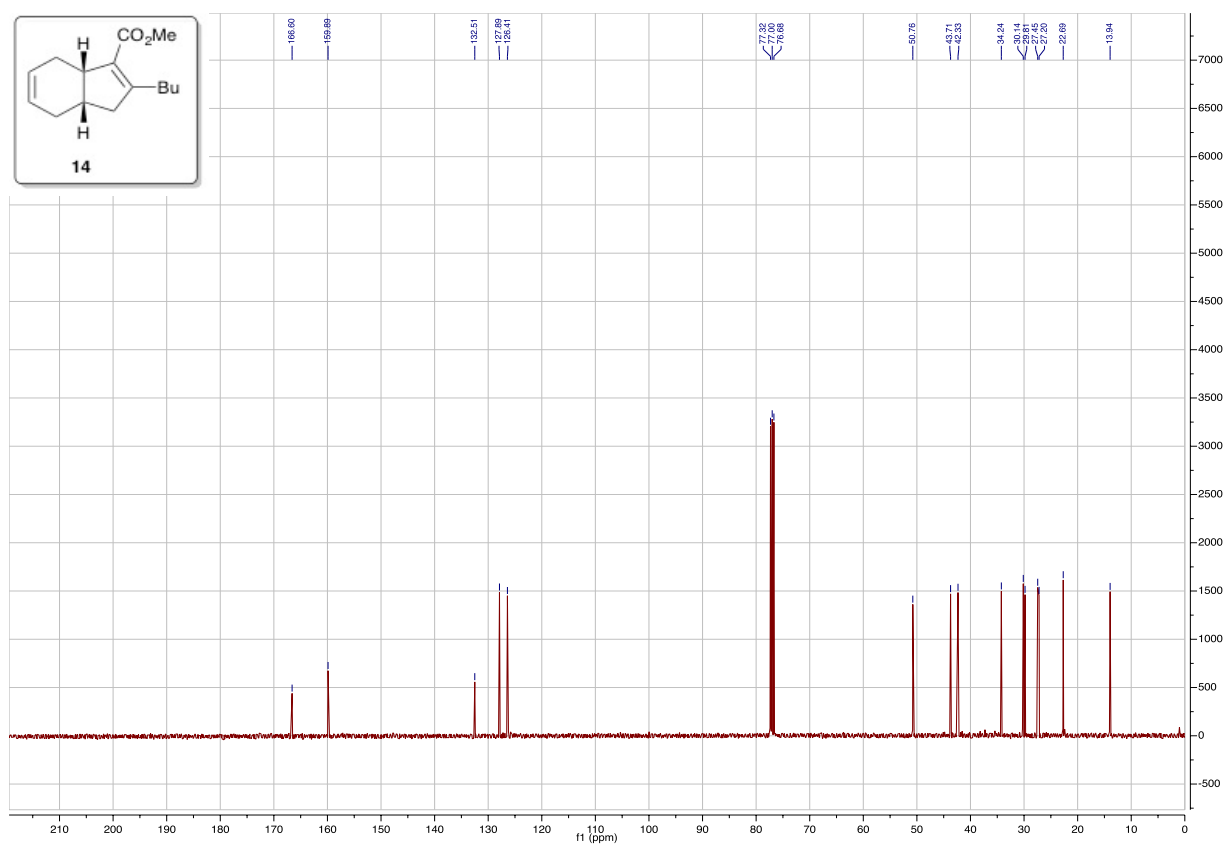

Figure S-18 <sup>13</sup>C-NMR spectrum of compound **14**.

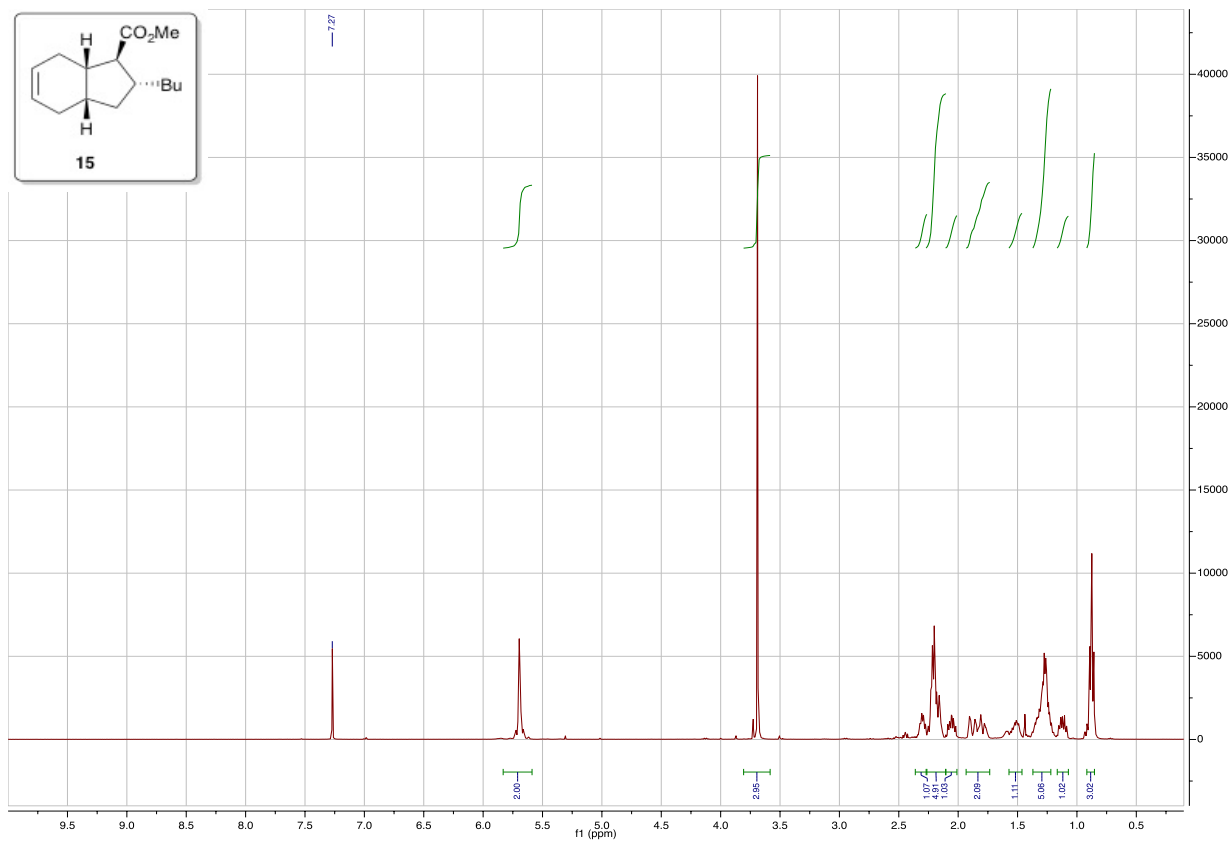

Figure S-19 <sup>1</sup>H-NMR spectrum of compound 15.

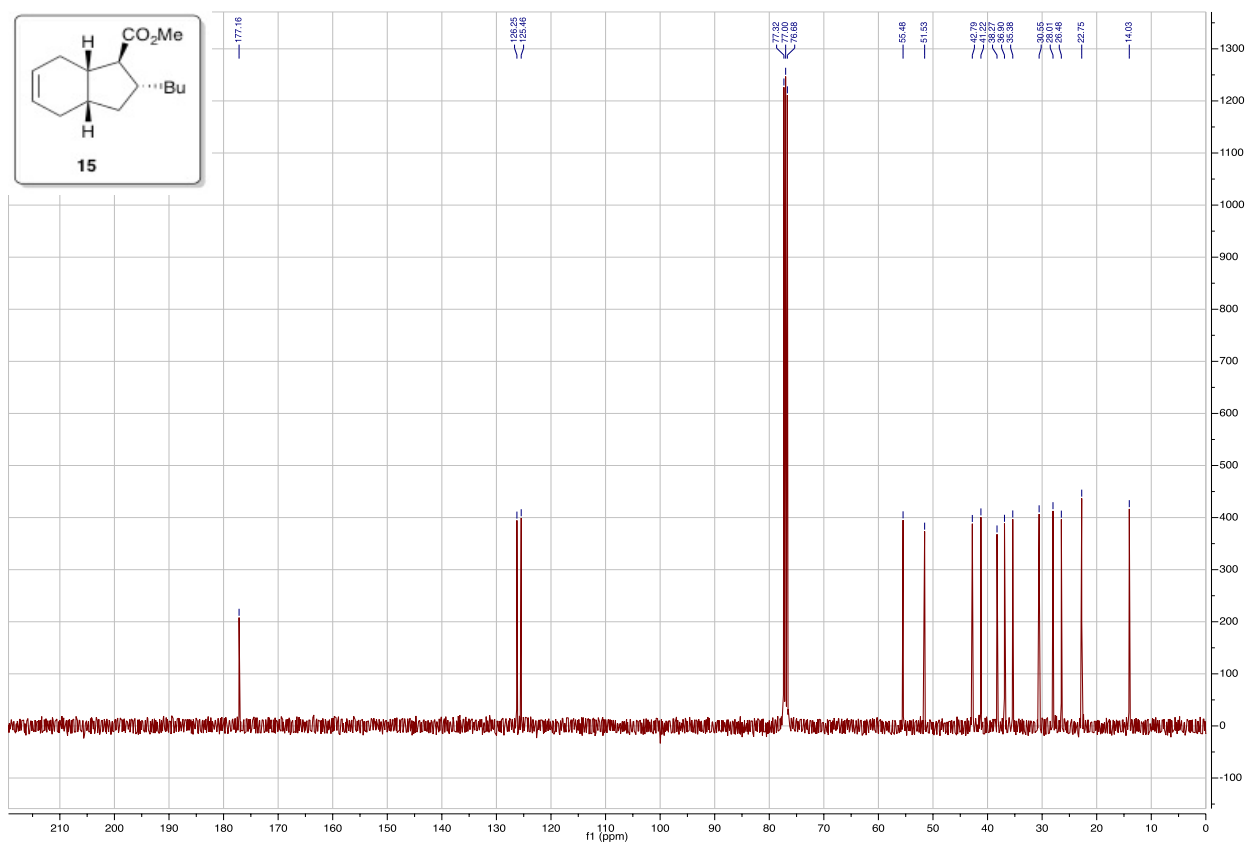

Figure S-20 <sup>13</sup>C-NMR spectrum of compound 15.

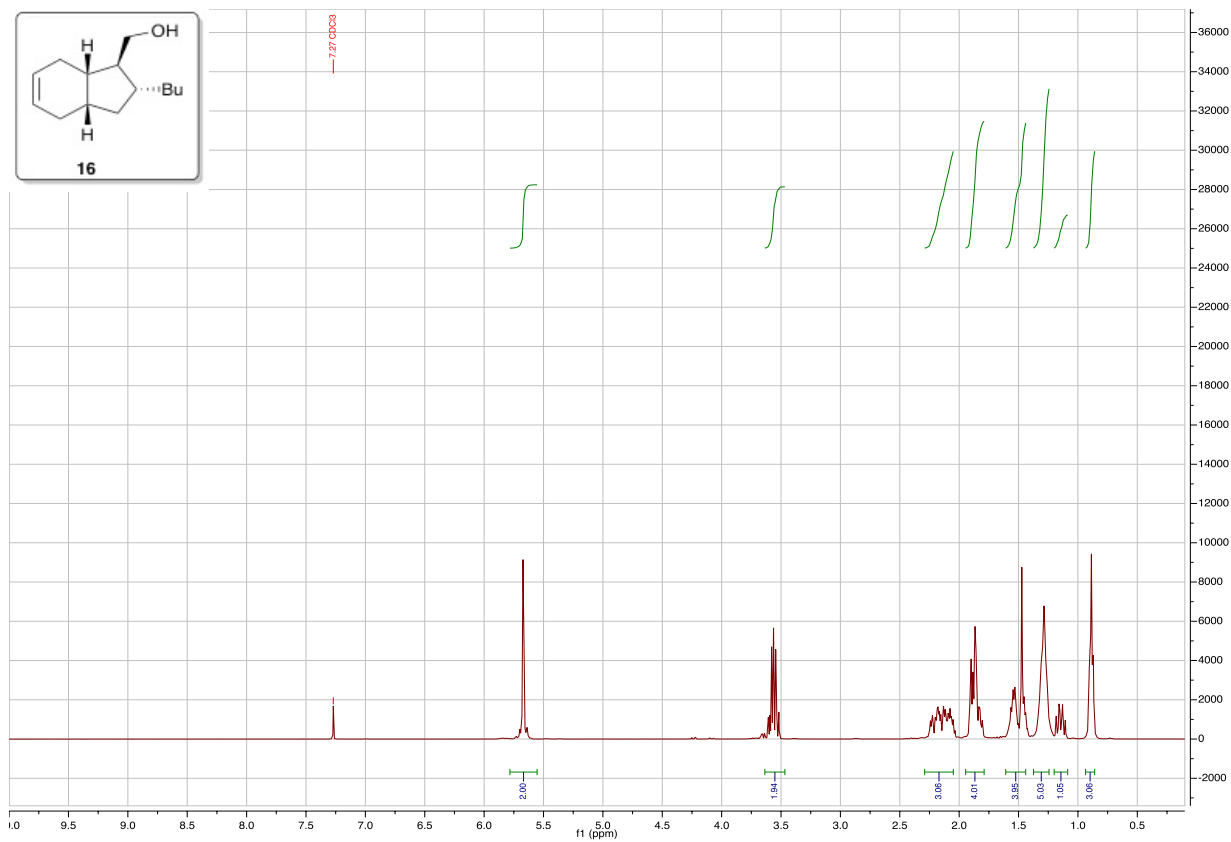

Figure S-21 <sup>1</sup>H-NMR spectrum of compound 16.

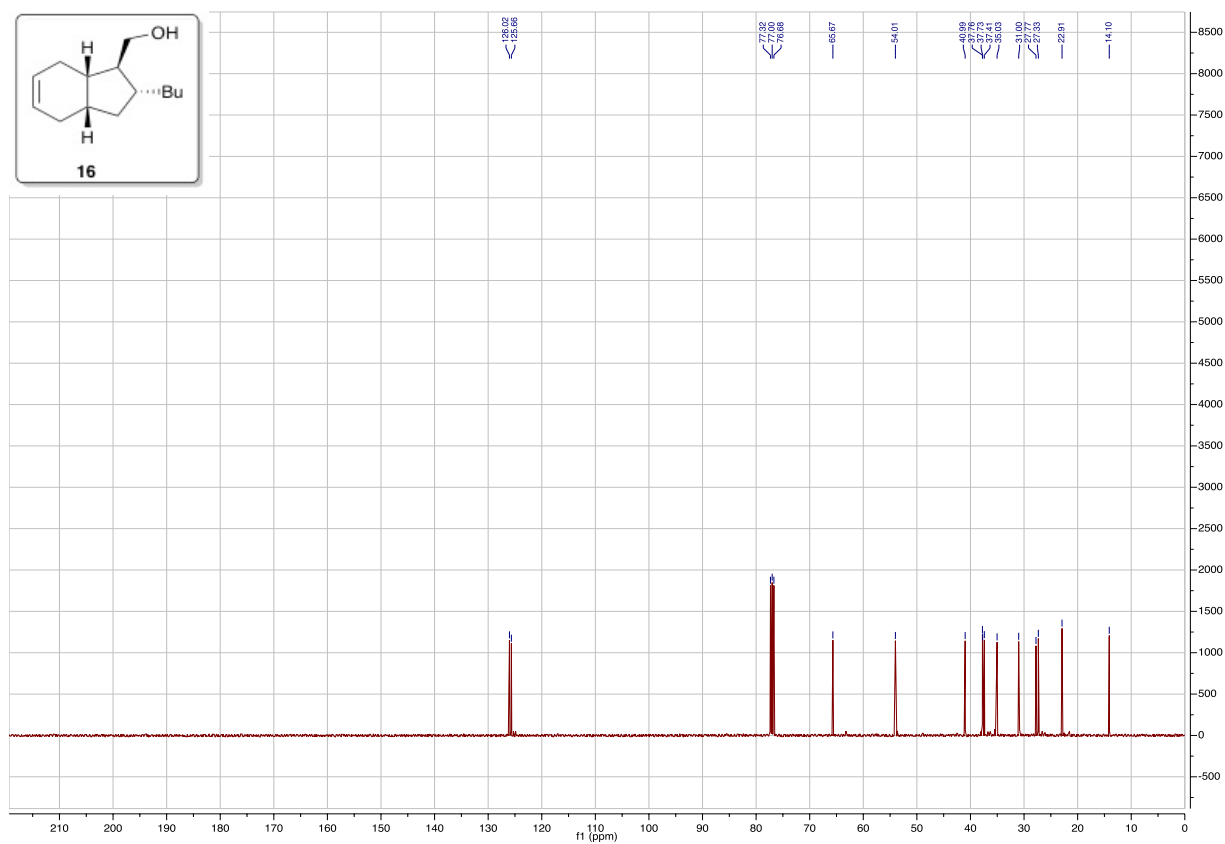

Figure S-16 <sup>13</sup>C-NMR spectrum of compound 22.

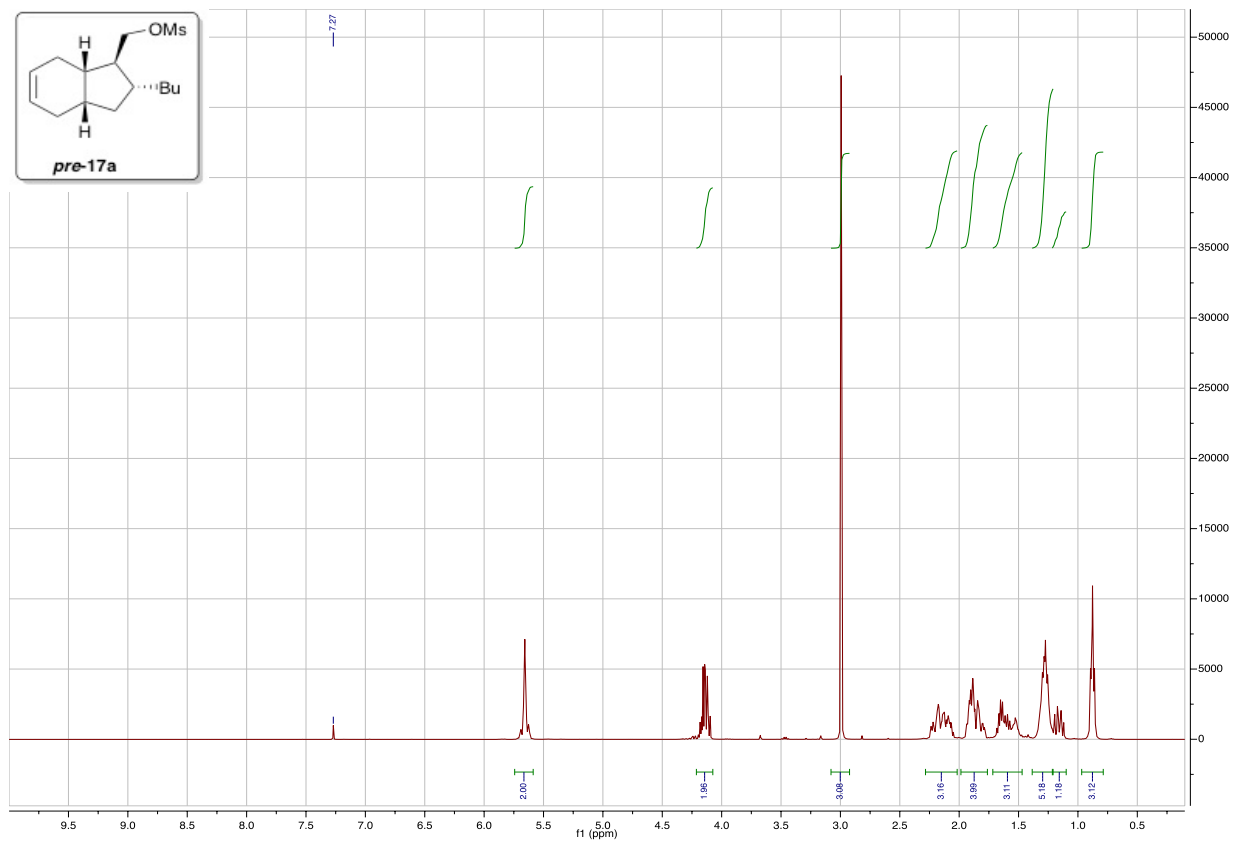

Figure S-23  $^1\text{H}$ -NMR spectrum of compound **pre-17a**.

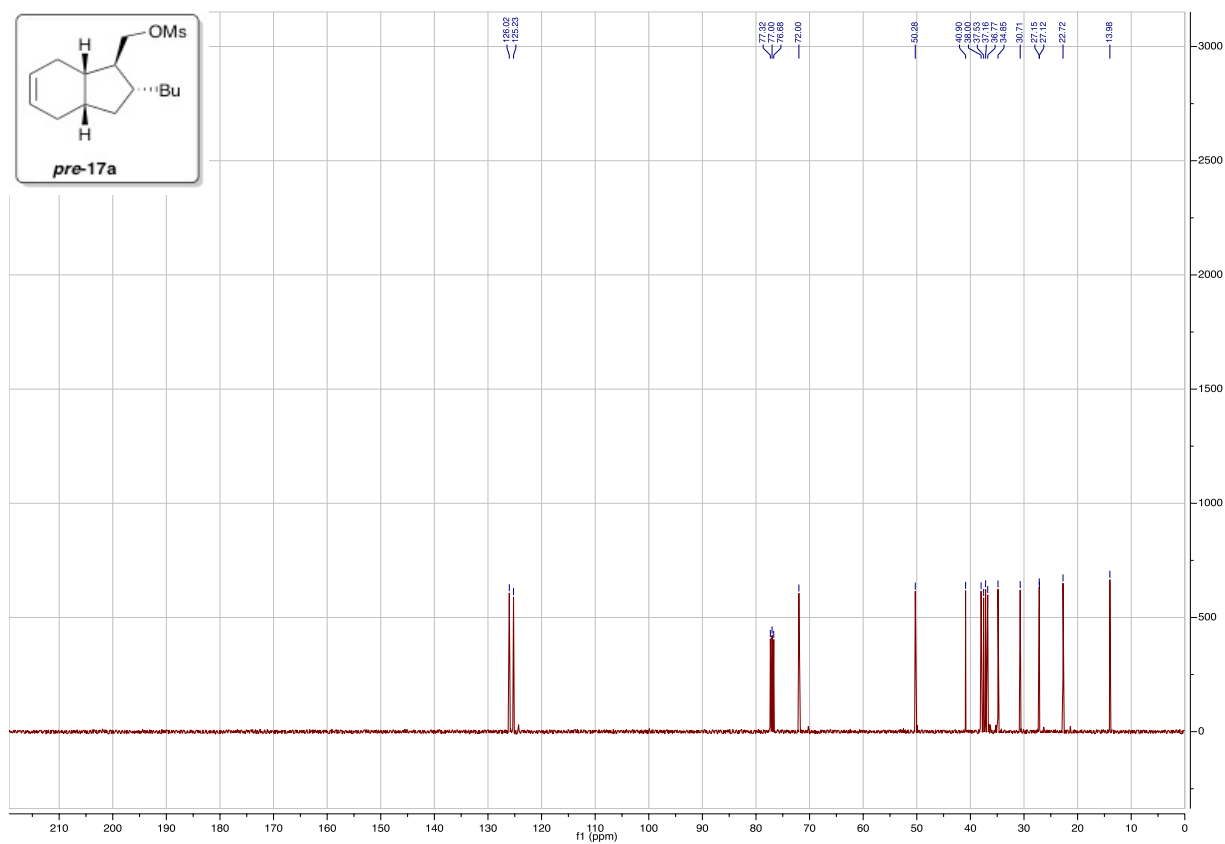

Figure S-24  $^{13}\text{C}$ -NMR spectrum of compound **pre-17a**.

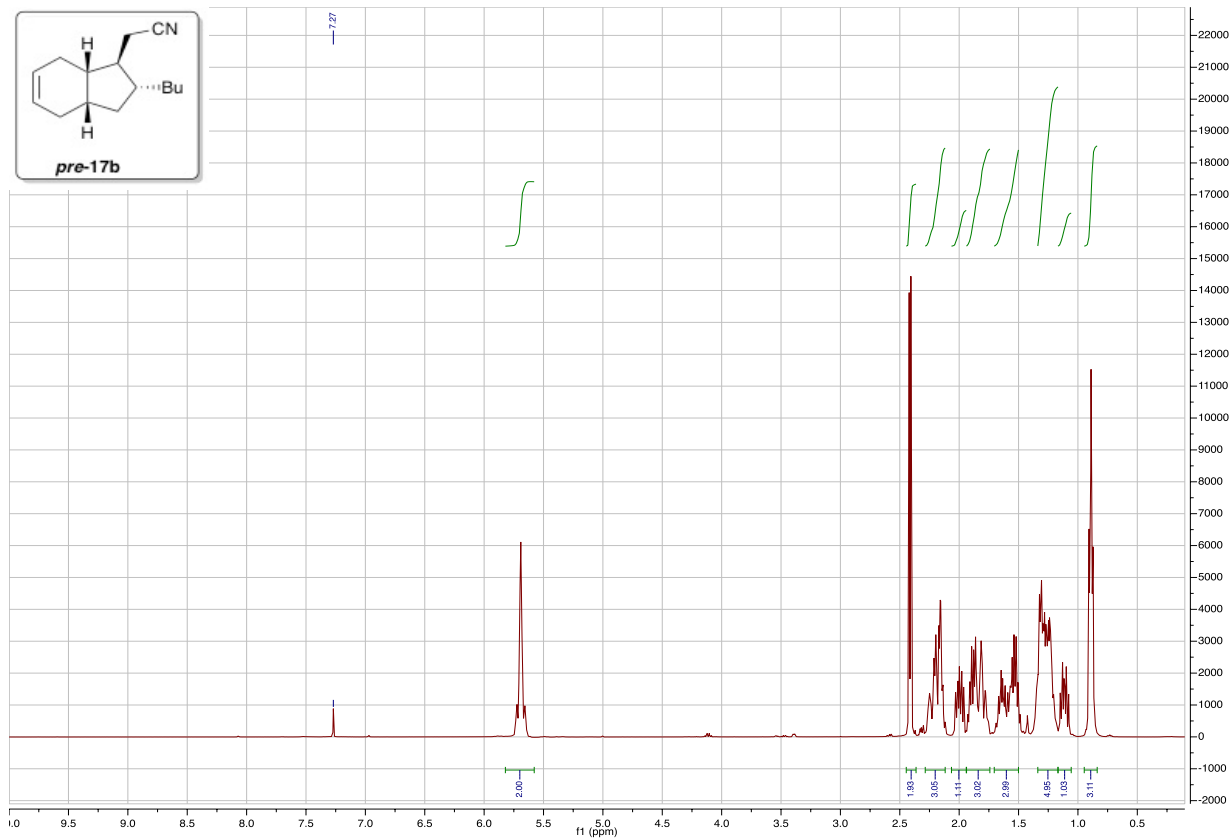

Figure S-25 <sup>1</sup>H-NMR spectrum of compound *pre-17b*.

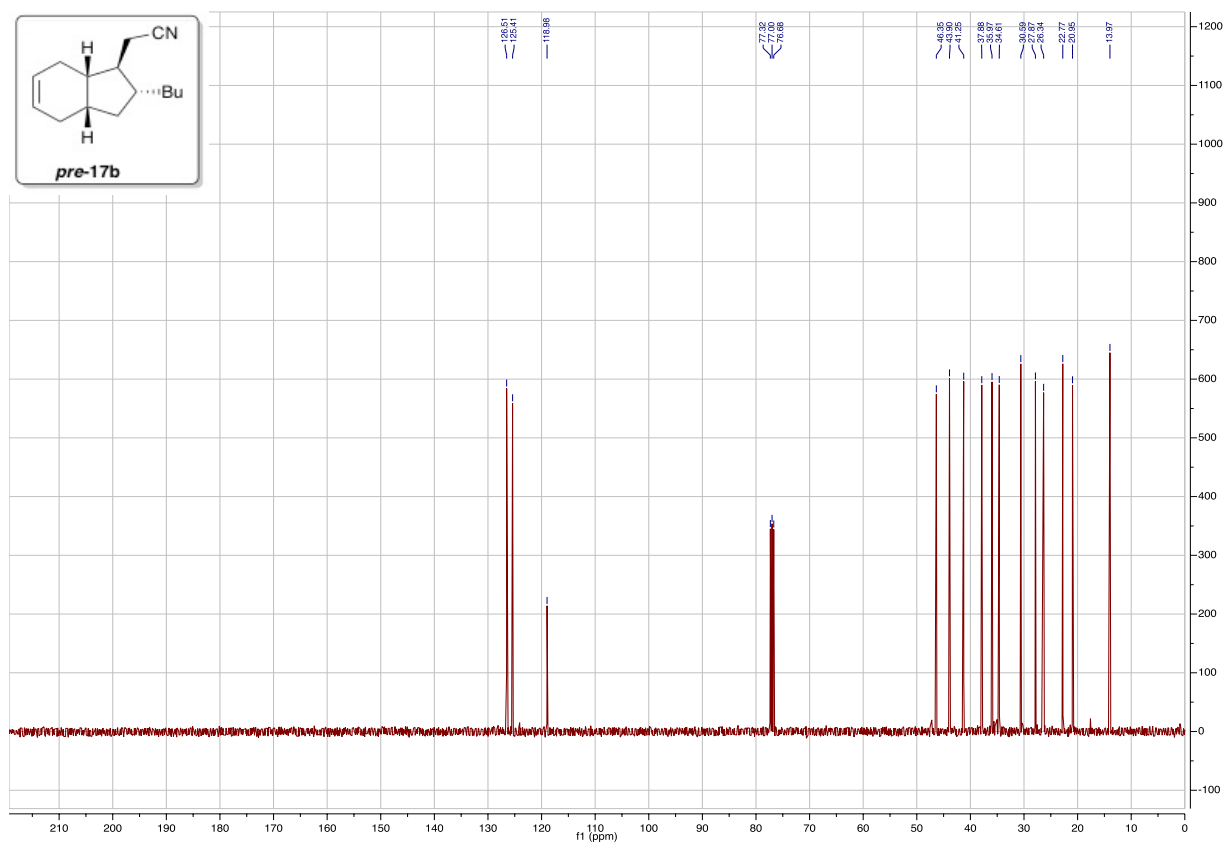

Figure S-26 <sup>13</sup>C-NMR spectrum of compound *pre-17b*.

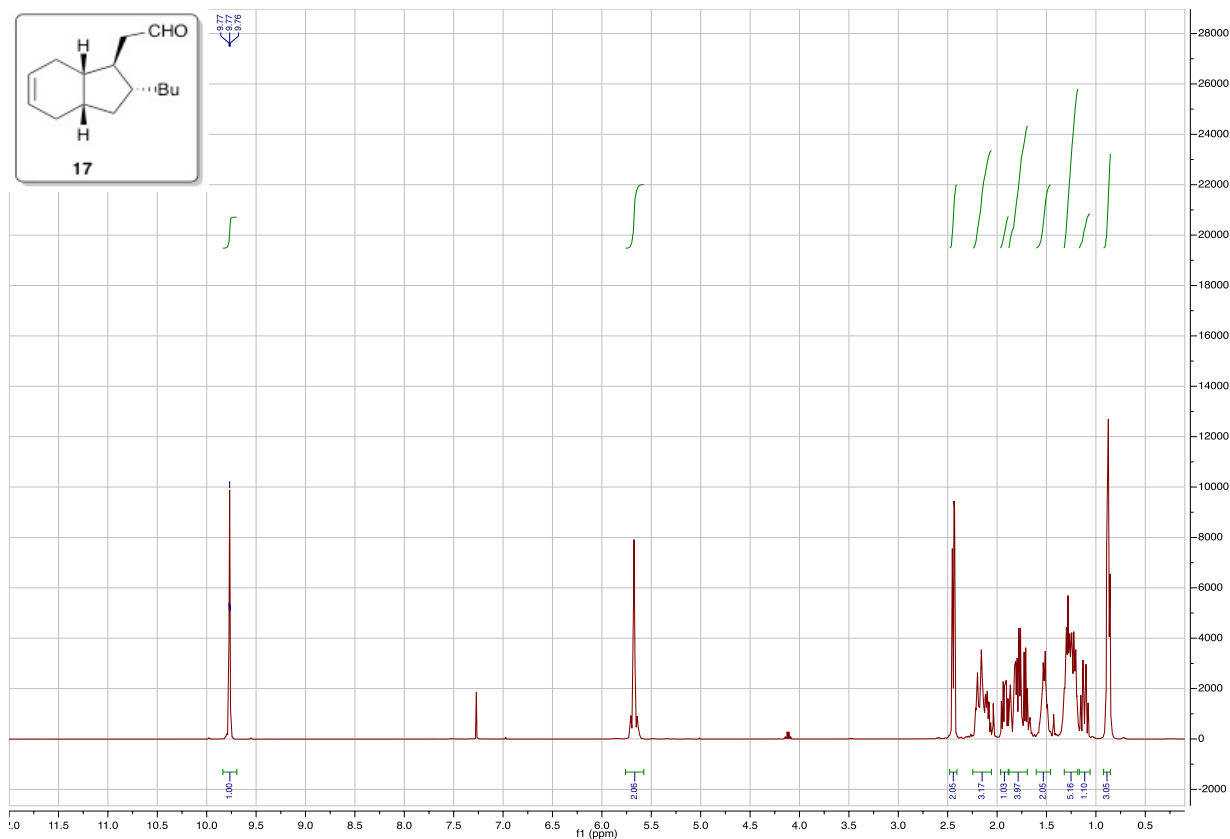

Figure S-27 <sup>1</sup>H-NMR spectrum of compound 17.

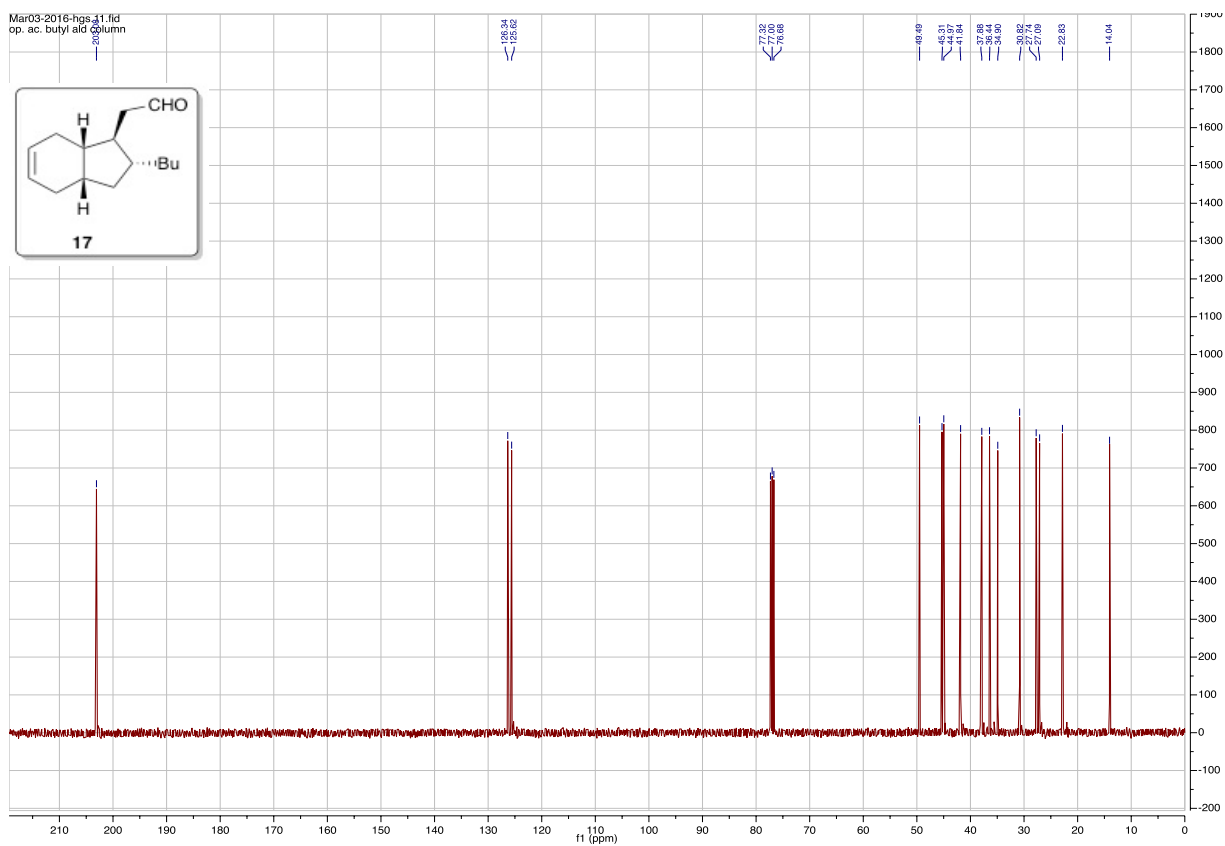

Figure S-28 <sup>13</sup>C-NMR spectrum of compound 17.

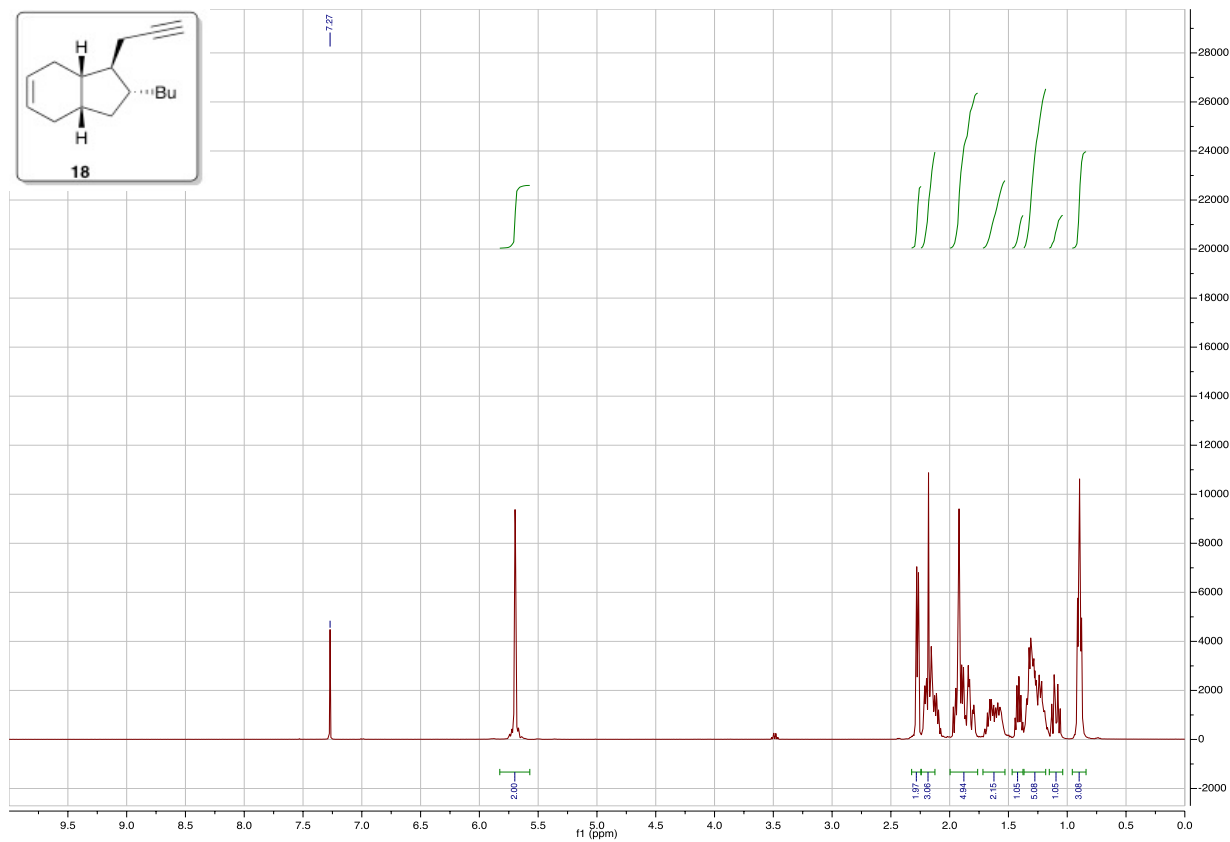

Figure S-29  $^1\text{H}$ -NMR spectrum of compound **18**.

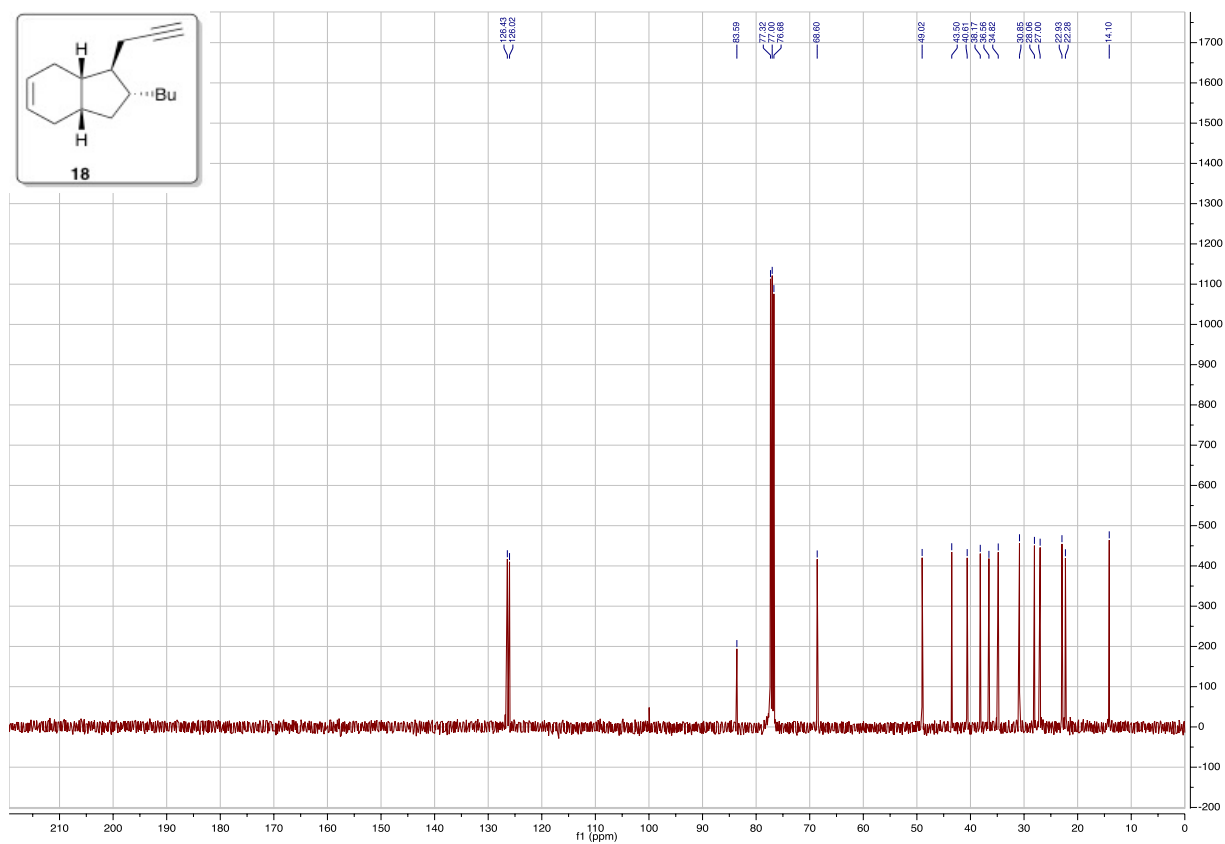

Figure S-30  $^{13}\text{C}$ -NMR spectrum of compound **18**.



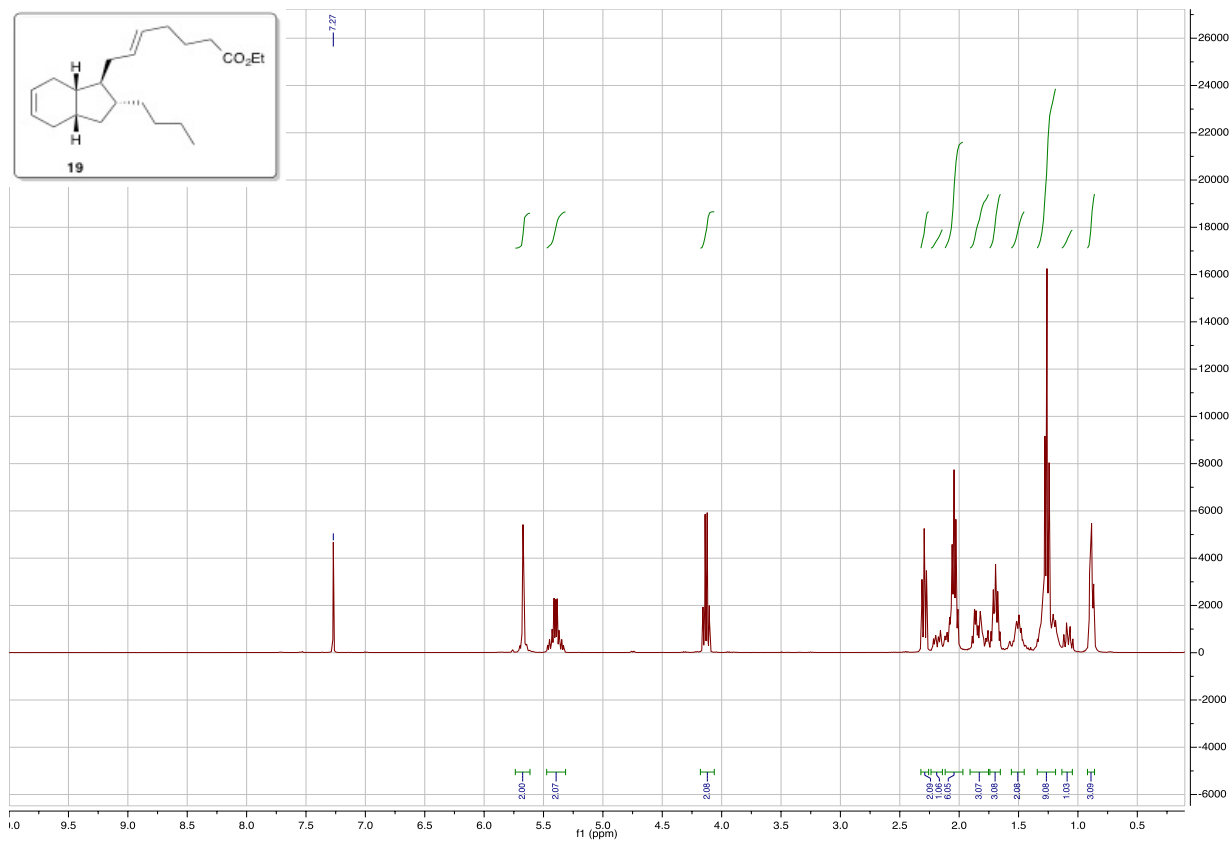

Figure S-31 <sup>1</sup>H-NMR spectrum of compound 19.

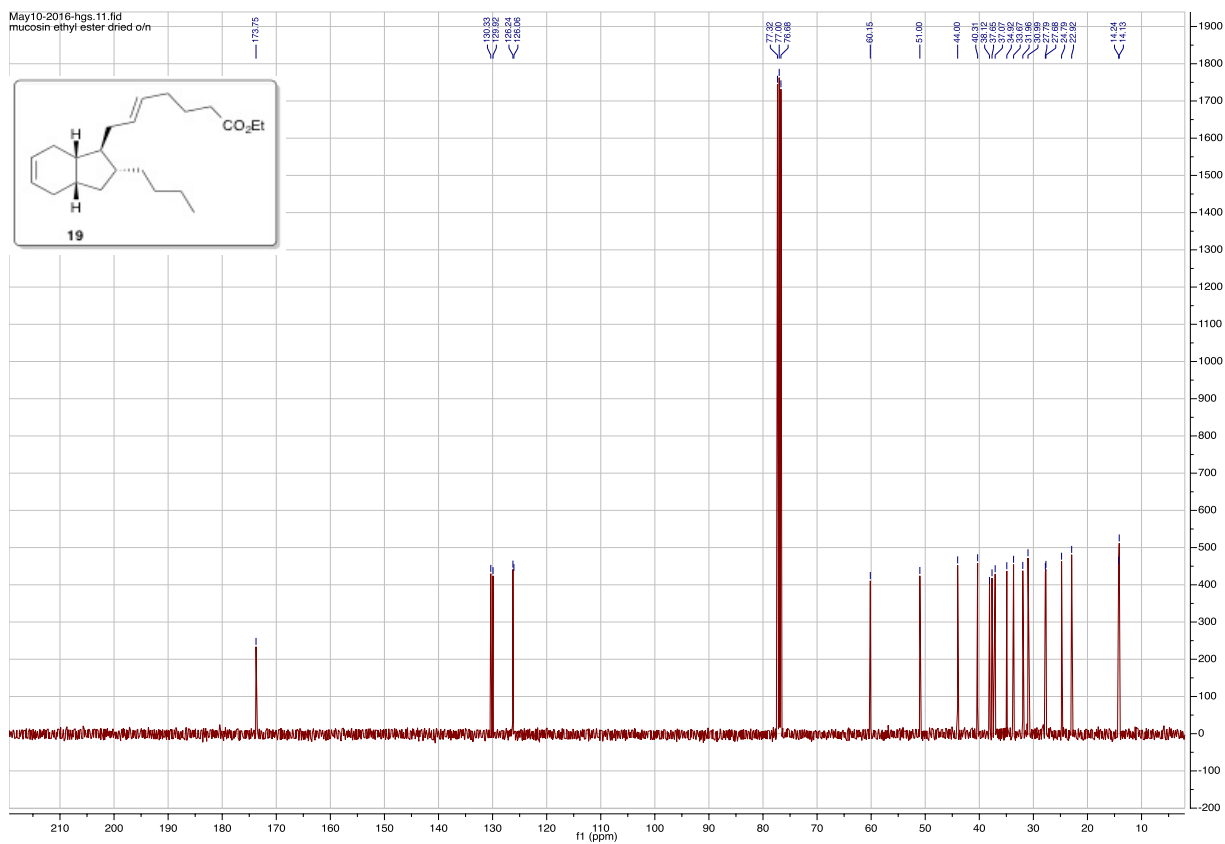

Figure S-32 <sup>13</sup>C-NMR spectrum of compound 19.

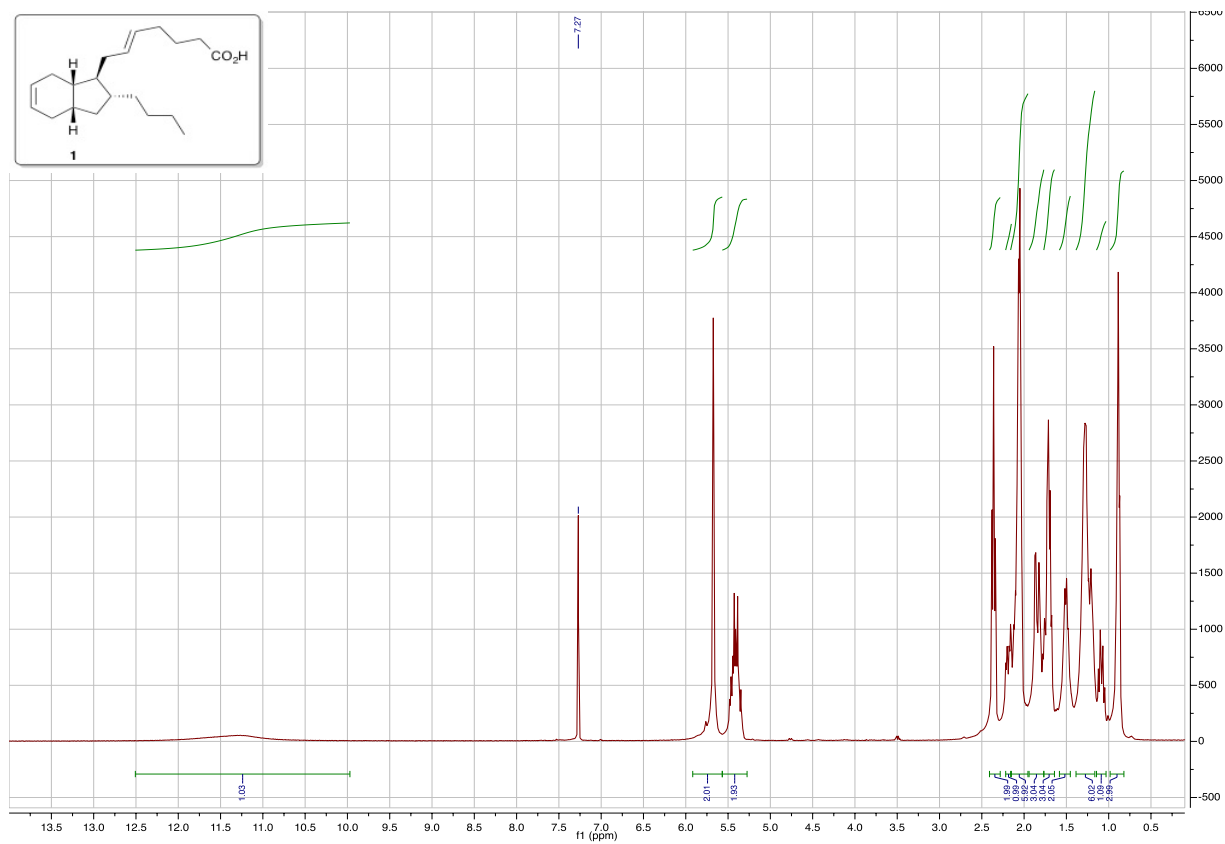

Figure S-33 <sup>1</sup>H-NMR spectrum of compound 1.

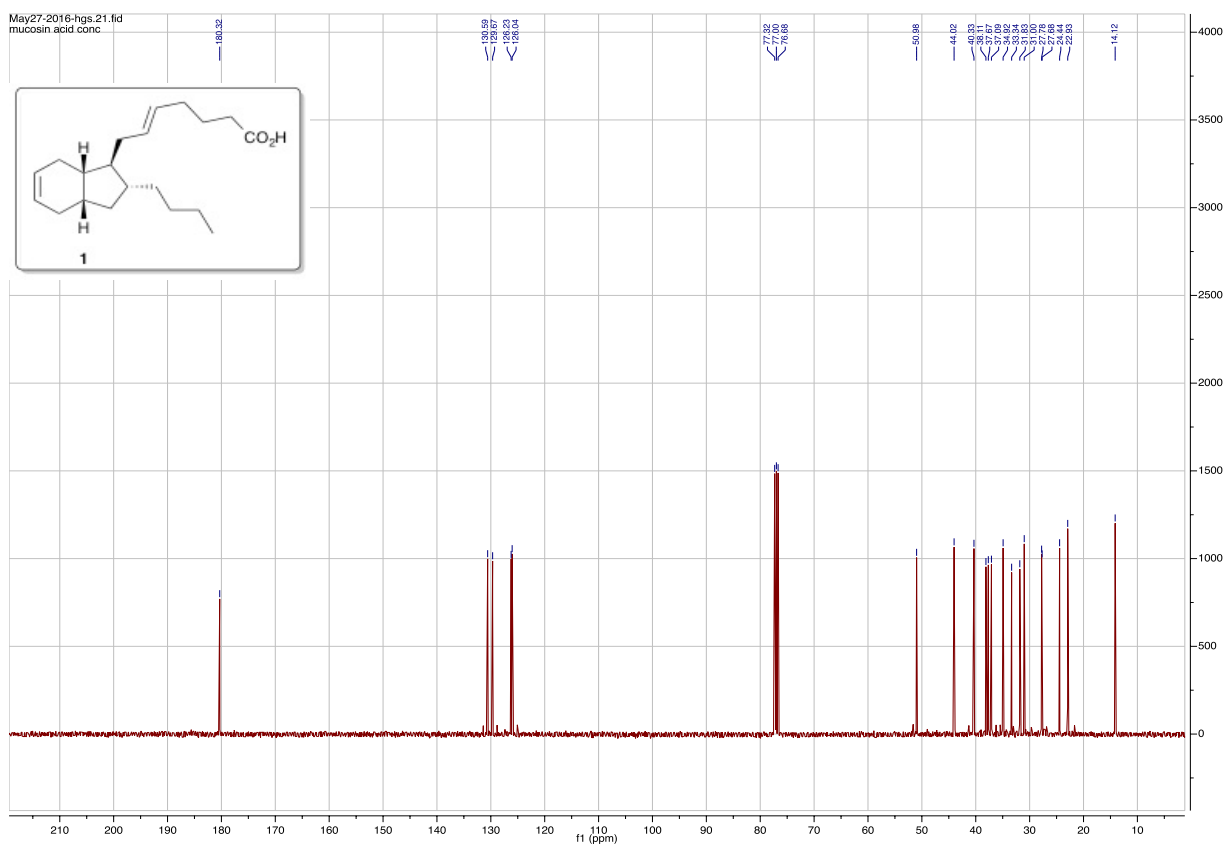

Figure S-34 <sup>13</sup>C-NMR spectrum of compound 1.

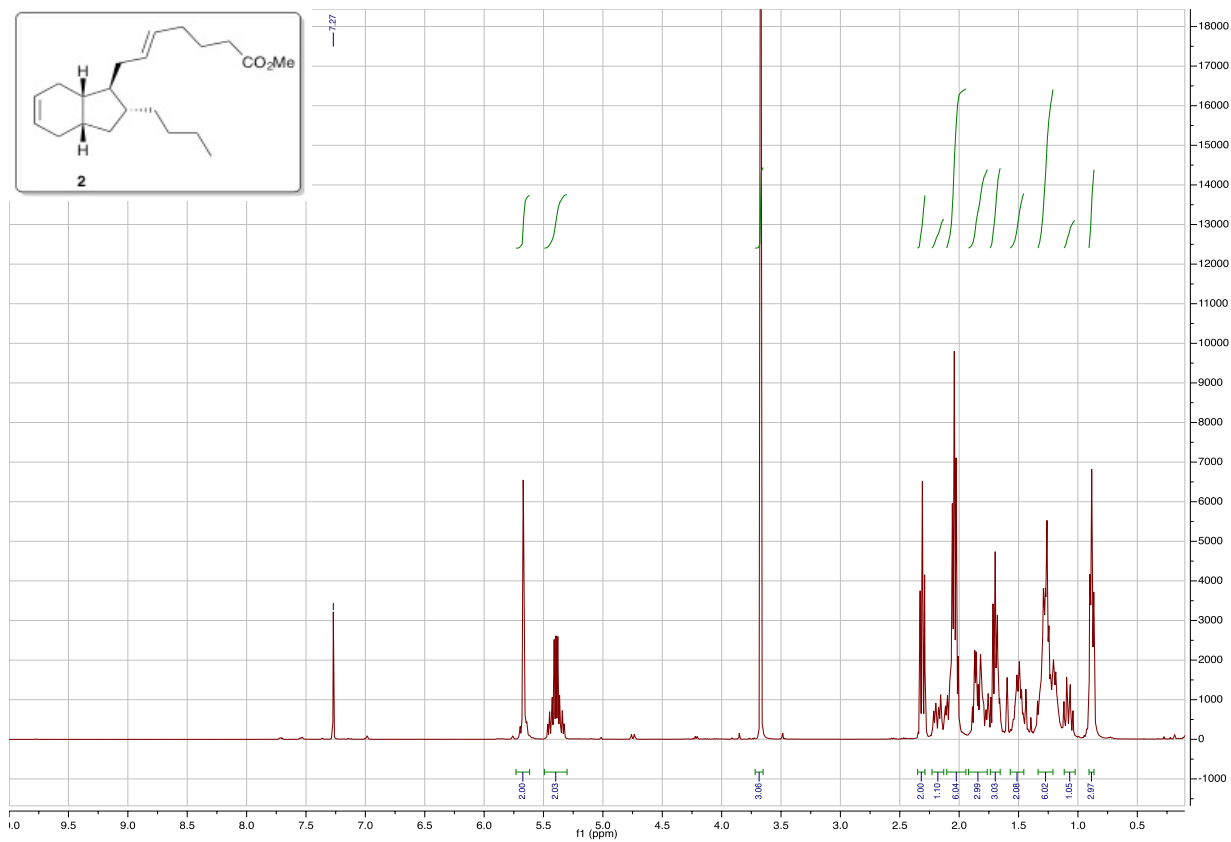

Figure S-35 <sup>1</sup>H-NMR spectrum of compound 2.

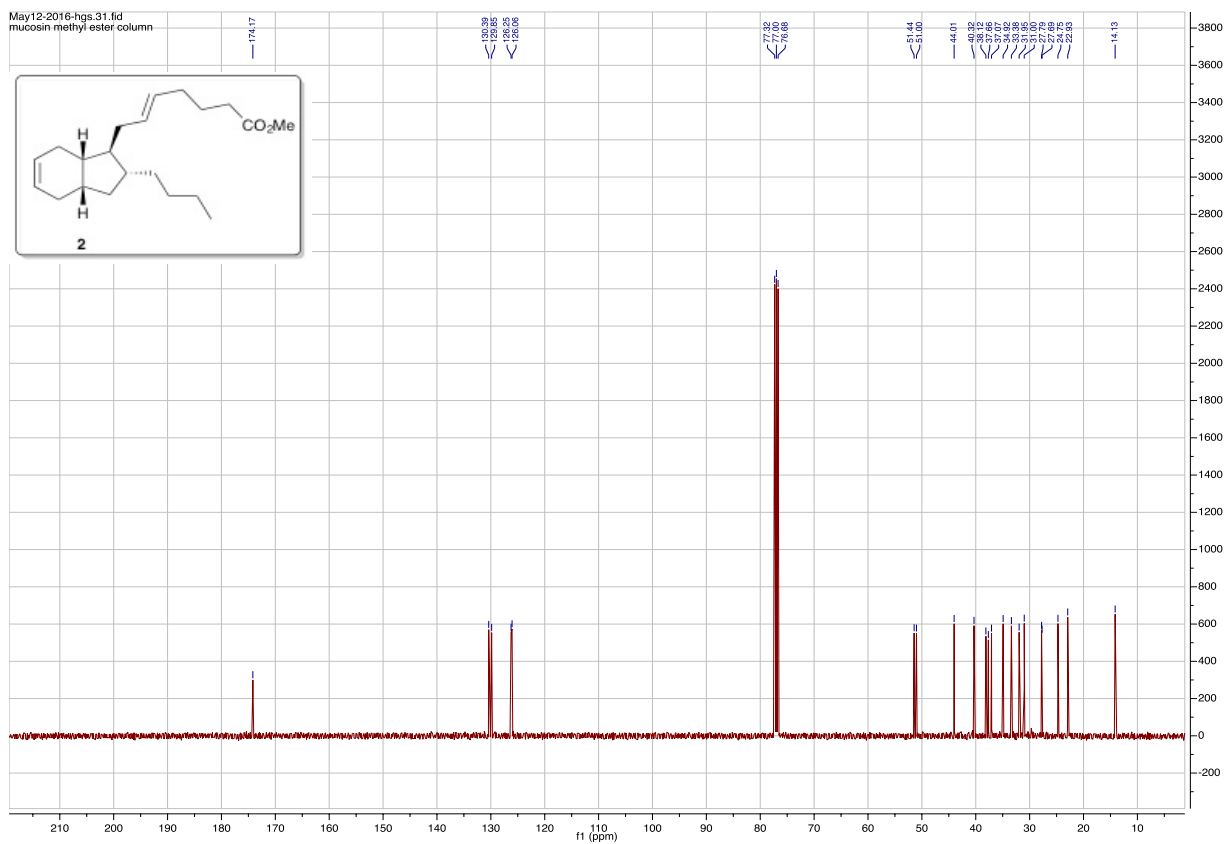

Figure S-36 <sup>13</sup>C-NMR spectrum of compound 2.

## Elemental Composition Report

### Single Mass Analysis

Tolerance = 10.0 PPM / DBE: min = -1.5, max = 50.0

Isotope cluster parameters: Separation = 1.0 Abundance = 1.0%

Monoisotopic Mass, Odd and Even Electron Ions

47 formula(e) evaluated with 1 results within limits (up to 50 closest results for each mass)

Sample 3 C<sub>11</sub>H<sub>14</sub>O<sub>3</sub> MW 194  
DEHGS2016021903 65 (2.723)

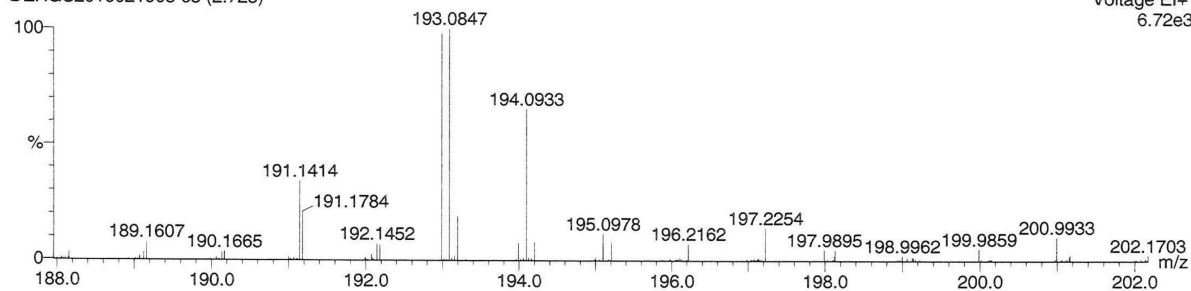

Minimum: -1.5  
Maximum: 200.0 10.0 50.0

| Mass     | Calc. Mass | mDa  | PPM  | DBE | Score | Formula                                        |
|----------|------------|------|------|-----|-------|------------------------------------------------|
| 194.0933 | 194.0943   | -1.0 | -5.1 | 5.0 | 1     | C <sub>11</sub> H <sub>14</sub> O <sub>3</sub> |

Figure S-37 HRMS of compound 12.

## Elemental Composition Report

### Single Mass Analysis

Tolerance = 10.0 PPM / DBE: min = -1.5, max = 50.0

Isotope cluster parameters: Separation = 1.0 Abundance = 1.0%

Monoisotopic Mass, Odd and Even Electron Ions

287 formula(e) evaluated with 3 results within limits (up to 50 closest results for each mass)

Sample 4 C<sub>12</sub>H<sub>13</sub>O<sub>5</sub>SF<sub>3</sub> MW 326  
DEHGS2016021904 66 (2.761)

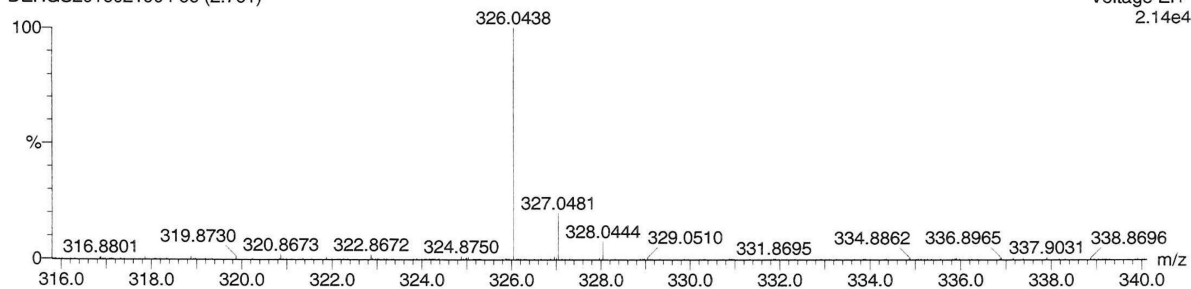

Minimum: -1.5  
Maximum: 200.0 10.0 50.0

| Mass     | Calc. Mass | mDa | PPM | DBE  | Score | Formula                                                         |
|----------|------------|-----|-----|------|-------|-----------------------------------------------------------------|
| 326.0438 | 326.0436   | 0.2 | 0.7 | 5.0  | 3     | C <sub>12</sub> H <sub>13</sub> O <sub>5</sub> S F <sub>3</sub> |
|          | 326.0424   | 1.4 | 4.2 | 9.0  | 2     | C <sub>15</sub> H <sub>12</sub> O <sub>4</sub> S F <sub>2</sub> |
|          | 326.0413   | 2.5 | 7.7 | 13.0 | 1     | C <sub>18</sub> H <sub>11</sub> O <sub>3</sub> S F              |

Figure S-38 HRMS of compound 13.

## Elemental Composition Report

### Single Mass Analysis

Tolerance = 10.0 PPM / DBE: min = -1.5, max = 50.0

Isotope cluster parameters: Separation = 1.0 Abundance = 1.0%

Monoisotopic Mass, Odd and Even Electron Ions

30 formula(e) evaluated with 1 results within limits (up to 50 closest results for each mass)

C15H22O2 HRMS MW 3234.1620

DEHarry2016030401 547 (11.014)

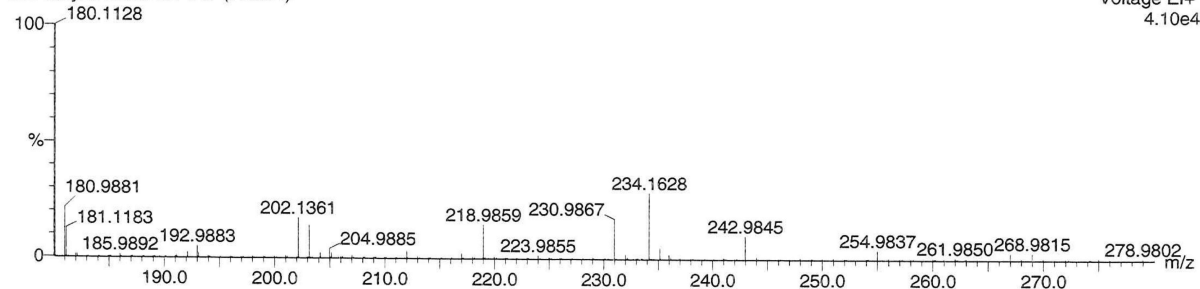

Minimum: 200.0 10.0 -1.5  
Maximum: 200.0 10.0 50.0

| Mass     | Calc. Mass | mDa | PPM | DBE | Score | Formula    |
|----------|------------|-----|-----|-----|-------|------------|
| 234.1628 | 234.1620   | 0.8 | 3.5 | 5.0 | 1     | C15 H22 O2 |

Figure S-39 HRMS of compound 14.

## Elemental Composition Report

### Single Mass Analysis

Tolerance = 10.0 PPM / DBE: min = -1.5, max = 50.0

Isotope cluster parameters: Separation = 1.0 Abundance = 1.0%

Monoisotopic Mass, Odd and Even Electron Ions

31 formula(e) evaluated with 1 results within limits (up to 50 closest results for each mass)

C15H24O2 HRMS MW 236.1776 pr 2

DEHarry2016030402 265 (5.336)

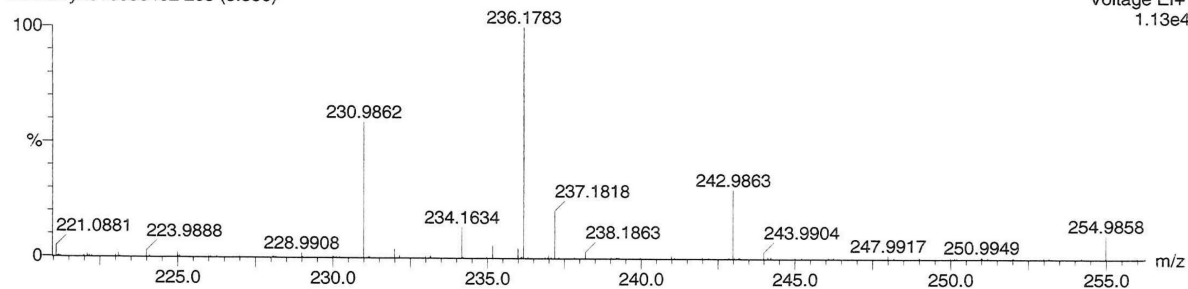

Minimum: 200.0 10.0 -1.5  
Maximum: 200.0 10.0 50.0

| Mass     | Calc. Mass | mDa | PPM | DBE | Score | Formula    |
|----------|------------|-----|-----|-----|-------|------------|
| 236.1783 | 236.1776   | 0.7 | 2.8 | 4.0 | 1     | C15 H24 O2 |

Figure S-40 HRMS of compound 15.

## Elemental Composition Report

### Single Mass Analysis

Tolerance = 10.0 PPM / DBE: min = -1.5, max = 50.0

Isotope cluster parameters: Separation = 1.0 Abundance = 1.0%

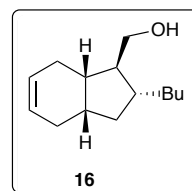

Page 1

Monoisotopic Mass, Odd and Even Electron Ions

21 formula(e) evaluated with 1 results within limits (up to 50 closest results for each mass)

C<sub>14</sub>H<sub>24</sub>O HRMS MW 208,1827 pr 3  
DEHarry2016030403 222 (4.505)

Voltage EI+  
2.24e4

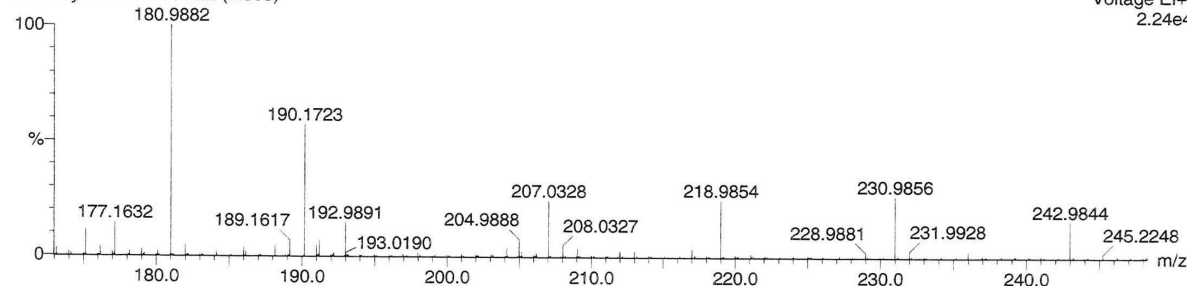

| Minimum: |            |      |      | -1.5 |       |                                 |
|----------|------------|------|------|------|-------|---------------------------------|
| Maximum: | 200.0      | 10.0 | 50.0 |      |       |                                 |
| Mass     | Calc. Mass | mDa  | PPM  | DBE  | Score | Formula                         |
| 190.1723 | 190.1722   | 0.1  | 0.8  | 4.0  | 1     | C <sub>14</sub> H <sub>22</sub> |

Figure S-41 HRMS of compound **16**.

## Elemental Composition Report

### Single Mass Analysis

Tolerance = 10.0 PPM / DBE: min = -1.5, max = 50.0

Isotope cluster parameters: Separation = 1.0 Abundance = 1.0%

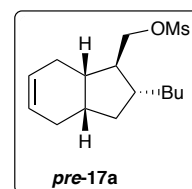

Page 1

Monoisotopic Mass, Odd and Even Electron Ions

234 formula(e) evaluated with 5 results within limits (up to 50 closest results for each mass)

Sample 5 C<sub>15</sub>H<sub>26</sub>O<sub>3</sub>S MW 286  
DEHGS2016021905 96 (4.016)

Voltage EI+  
29.2

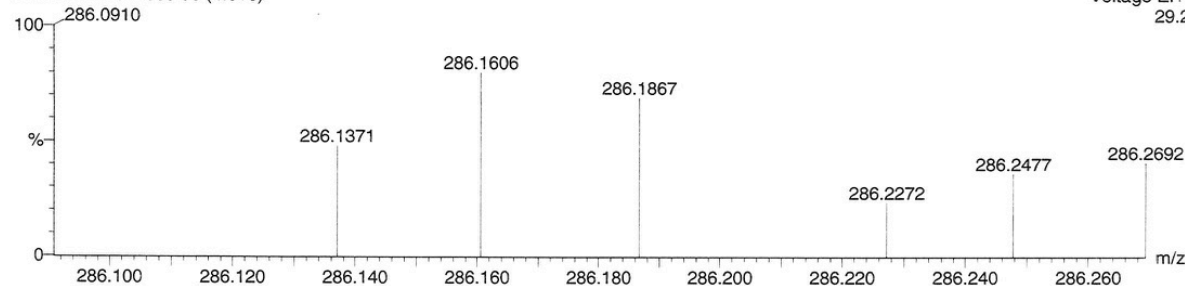

| Minimum: |            |      |      | -1.5 |       |                                                               |
|----------|------------|------|------|------|-------|---------------------------------------------------------------|
| Maximum: | 200.0      | 10.0 | 50.0 |      |       |                                                               |
| Mass     | Calc. Mass | mDa  | PPM  | DBE  | Score | Formula                                                       |
| 286.1606 | 286.1603   | 0.3  | 1.2  | 3.0  | 5     | C <sub>15</sub> H <sub>26</sub> O <sub>3</sub> S              |
|          | 286.1614   | -0.8 | -2.8 | -1.0 | 2     | C <sub>12</sub> H <sub>27</sub> O <sub>4</sub> F S            |
|          | 286.1592   | 1.4  | 5.0  | 0.0  | 1     | C <sub>12</sub> H <sub>24</sub> O <sub>5</sub> F <sub>2</sub> |
|          | 286.1580   | 2.6  | 9.0  | 4.0  | 4     | C <sub>15</sub> H <sub>23</sub> O <sub>4</sub> F              |
|          | 286.1578   | 2.8  | 9.7  | 0.0  | 3     | C <sub>13</sub> H <sub>25</sub> O F <sub>3</sub> S            |

Figure S-42 HRMS of compound **pre-17a**.

## Elemental Composition Report

### Single Mass Analysis

Tolerance = 10.0 PPM / DBE: min = -1.5, max = 50.0

Isotope cluster parameters: Separation = 1.0 Abundance = 1.0%

Monoisotopic Mass, Odd and Even Electron Ions

51 formula(e) evaluated with 1 results within limits (up to 50 closest results for each mass)

C<sub>15</sub>H<sub>23</sub>N HRMS MW 217 pr 4  
DEHarry2016030404 160 (3.247)

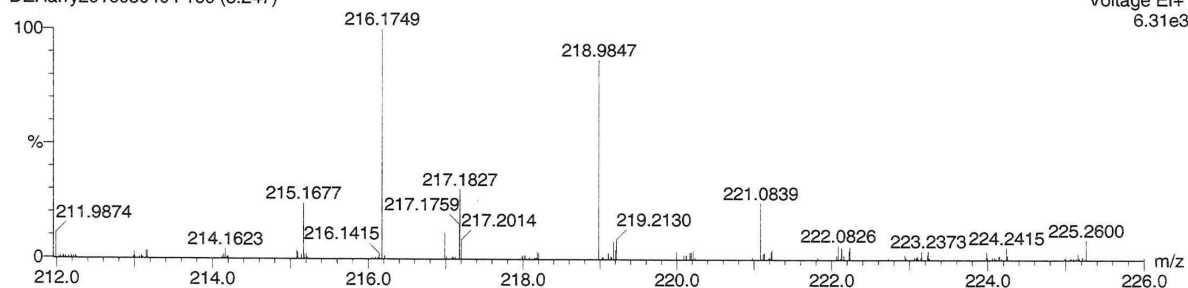

Minimum: 200.0 10.0 -1.5  
Maximum: 200.0 10.0 50.0

| Mass     | Calc. Mass | mDa  | PPM  | DBE | Score | Formula                           |
|----------|------------|------|------|-----|-------|-----------------------------------|
| 217.1827 | 217.1830   | -0.3 | -1.6 | 5.0 | 1     | C <sub>15</sub> H <sub>23</sub> N |

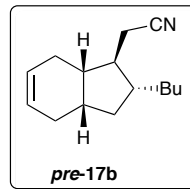

Page 1

Figure S-43 HRMS of compound **pre-17b**.

## Elemental Composition Report

### Single Mass Analysis

Tolerance = 10.0 PPM / DBE: min = -1.5, max = 50.0

Isotope cluster parameters: Separation = 1.0 Abundance = 1.0%

Monoisotopic Mass, Odd and Even Electron Ions

53 formula(e) evaluated with 1 results within limits (up to 50 closest results for each mass)

C<sub>15</sub>H<sub>24</sub>O HRMS MW 220 pr 5  
DEHarry2016030405 276 (5.601)

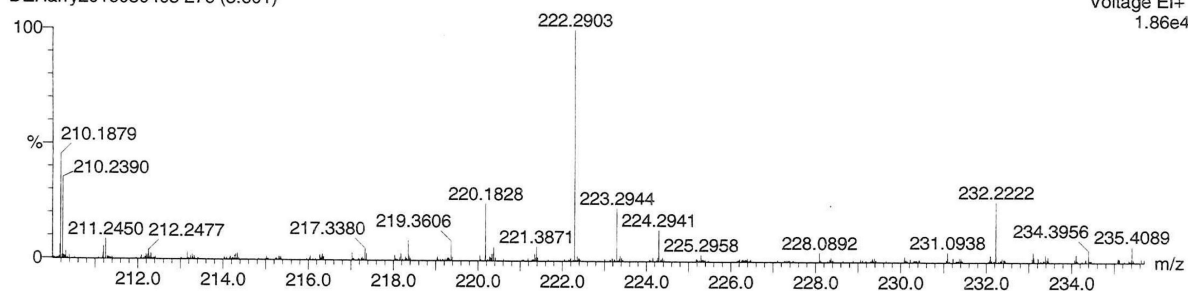

Minimum: 200.0 10.0 -1.5  
Maximum: 200.0 10.0 50.0

| Mass     | Calc. Mass | mDa | PPM | DBE | Score | Formula                           |
|----------|------------|-----|-----|-----|-------|-----------------------------------|
| 220.1828 | 220.1827   | 0.1 | 0.4 | 4.0 | 1     | C <sub>15</sub> H <sub>24</sub> O |

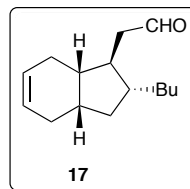

Page 1

Figure S-44 HRMS of compound **17**.



## Elemental Composition Report

Page 1

### Single Mass Analysis

Tolerance = 10.0 PPM / DBE: min = -1.5, max = 50.0

Isotope cluster parameters: Separation = 1.0 Abundance = 1.0%

Monoisotopic Mass, Odd and Even Electron Ions

6 formula(e) evaluated with 1 results within limits (up to 50 closest results for each mass)

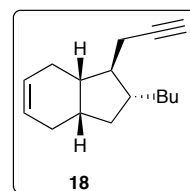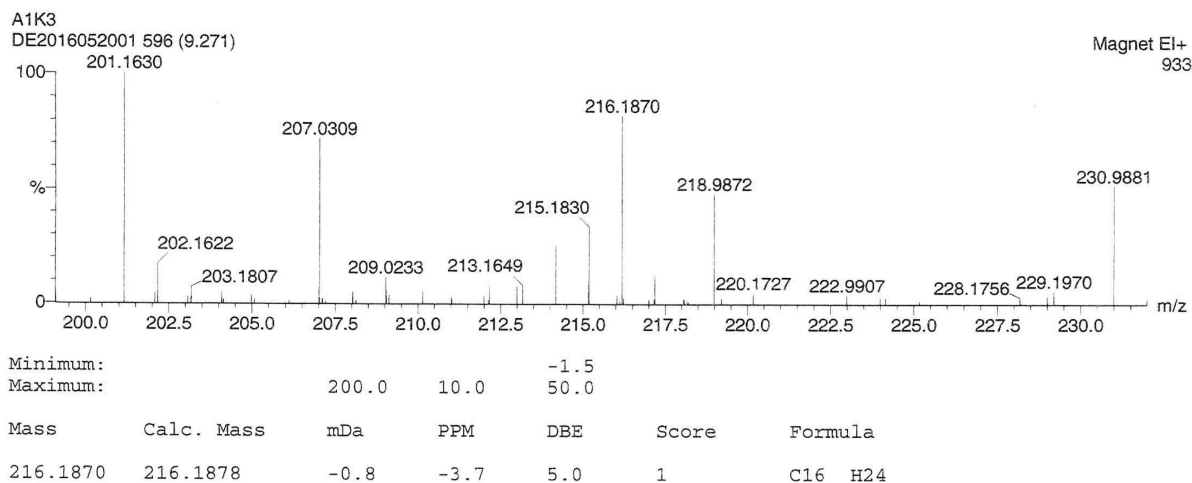

Figure S-45 HRMS of compound 18.

## Elemental Composition Report

Page 1

### Single Mass Analysis

Tolerance = 10.0 PPM / DBE: min = -1.5, max = 50.0

Isotope cluster parameters: Separation = 1.0 Abundance = 1.0%

Monoisotopic Mass, Odd and Even Electron Ions

32 formula(e) evaluated with 1 results within limits (up to 50 closest results for each mass)

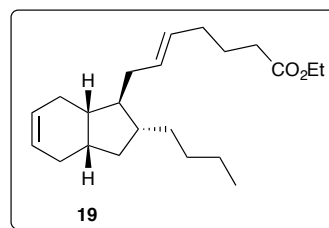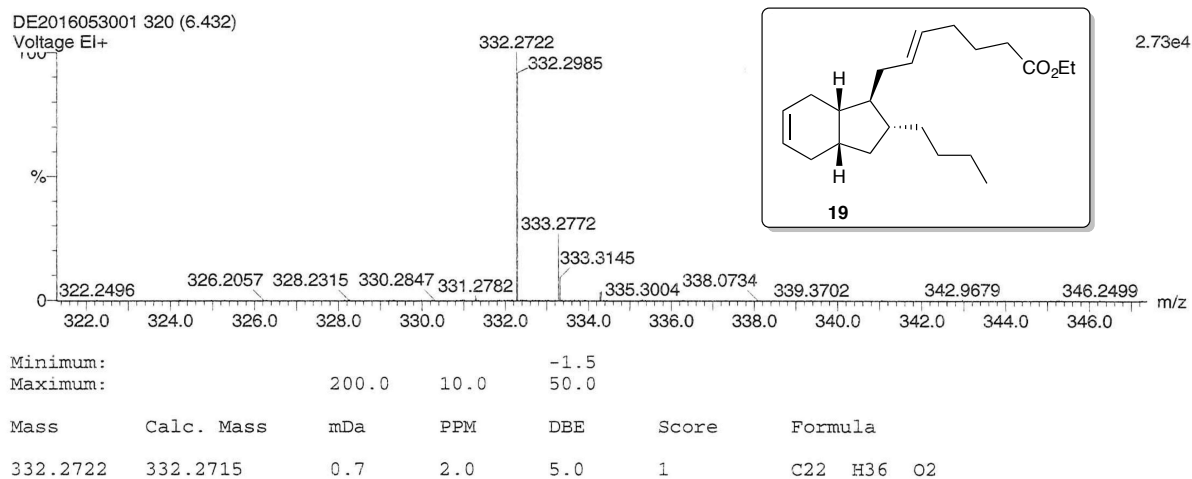

Figure S-46 HRMS of compound 19.



## Elemental Composition Report

Page 1

## Single Mass Analysis

Tolerance = 10.0 PPM / DBE: min = -1.5, max = 50.0

Isotope cluster parameters: Separation = 1.0 Abundance = 1.0%

Monoisotopic Mass, Odd and Even Electron Ions

29 formula(e) evaluated with 1 results within limits (up to 50 closest results for each mass)

C<sub>20</sub>H<sub>32</sub>O<sub>2</sub>  
DE2016053002 184 (3.702)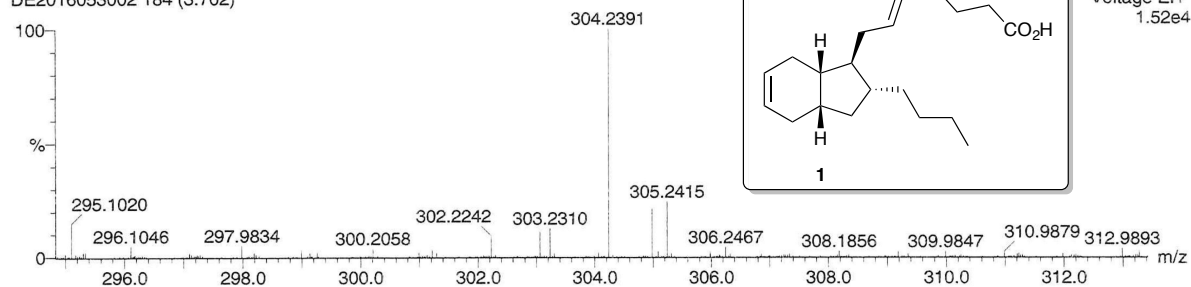

|          |            |      |      |      |       |                                                |
|----------|------------|------|------|------|-------|------------------------------------------------|
| Minimum: |            |      |      | -1.5 |       |                                                |
| Maximum: | 200.0      | 10.0 | 50.0 |      |       |                                                |
| Mass     | Calc. Mass | mDa  | PPM  | DBE  | Score | Formula                                        |
| 304.2391 | 304.2402   | -1.1 | -3.7 | 5.0  | 1     | C <sub>20</sub> H <sub>32</sub> O <sub>2</sub> |

Figure S-47 HRMS of compound 1.

## Elemental Composition Report

Page 1

## Single Mass Analysis

Tolerance = 10.0 PPM / DBE: min = -1.5, max = 50.0

Isotope cluster parameters: Separation = 1.0 Abundance = 1.0%

Monoisotopic Mass, Odd and Even Electron Ions

31 formula(e) evaluated with 1 results within limits (up to 50 closest results for each mass)

M.M.E  
DE2016052002 216 (2.851)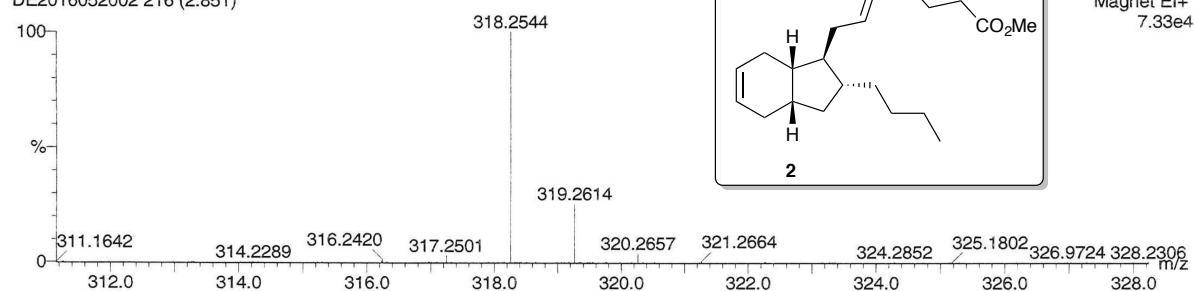

|          |            |      |      |      |       |                                                |
|----------|------------|------|------|------|-------|------------------------------------------------|
| Minimum: |            |      |      | -1.5 |       |                                                |
| Maximum: | 200.0      | 10.0 | 50.0 |      |       |                                                |
| Mass     | Calc. Mass | mDa  | PPM  | DBE  | Score | Formula                                        |
| 318.2544 | 318.2559   | -1.5 | -4.7 | 5.0  | 1     | C <sub>21</sub> H <sub>34</sub> O <sub>2</sub> |

Figure S-48 HRMS of compound 2.

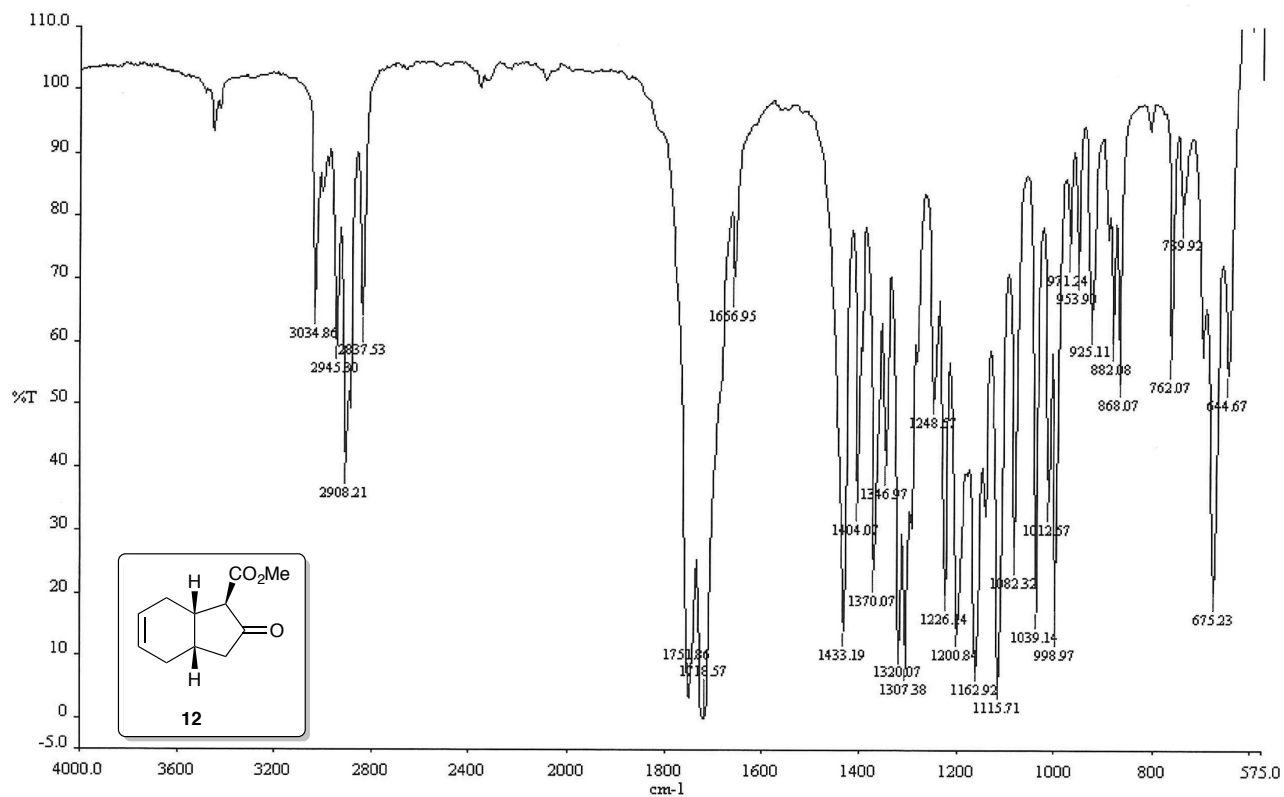

Figure S-49 IR of compound 12.

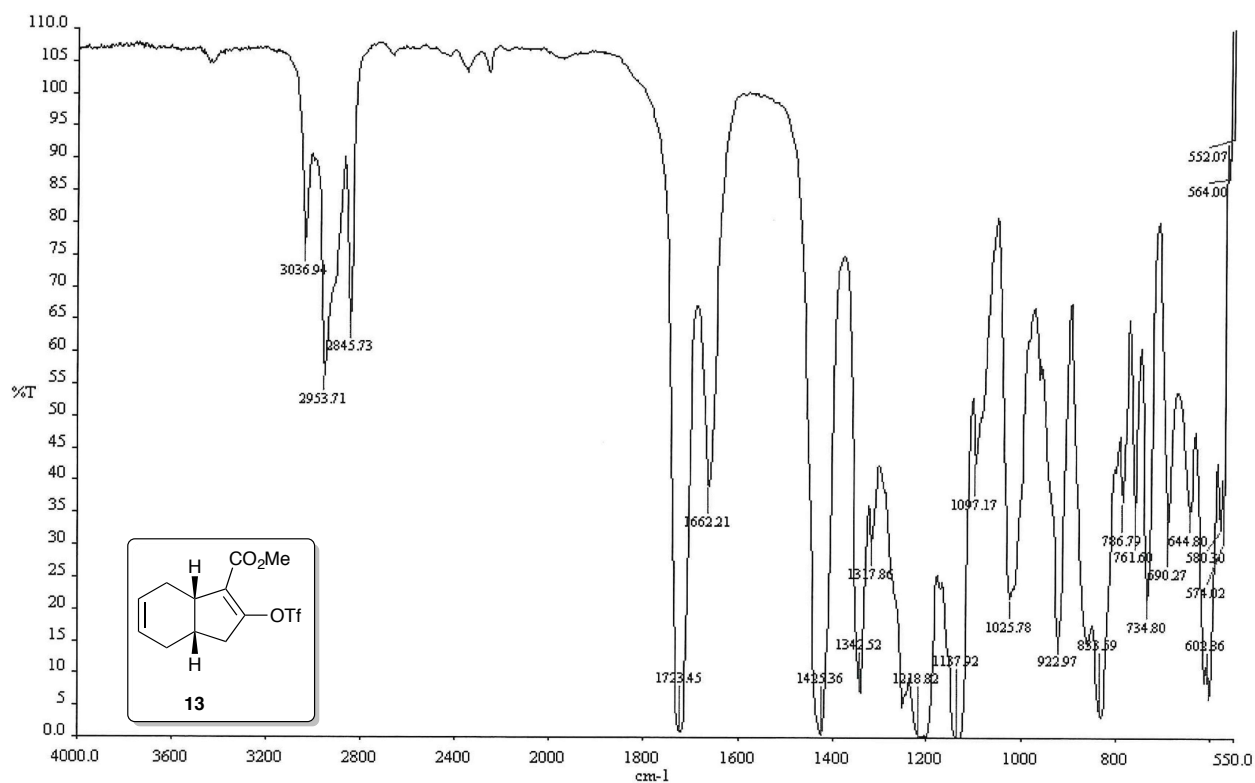

Figure S-50 IR of compound 13.

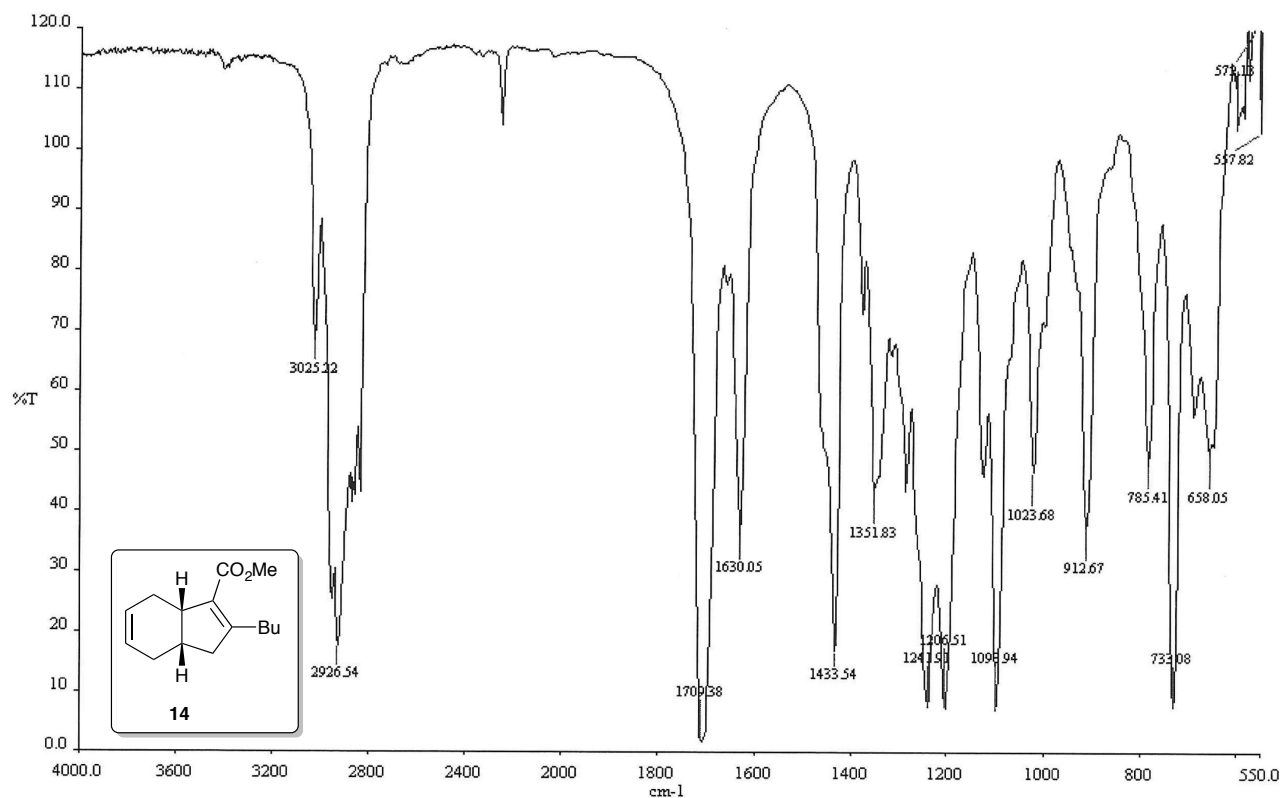

Figure S-51 IR of compound 14.

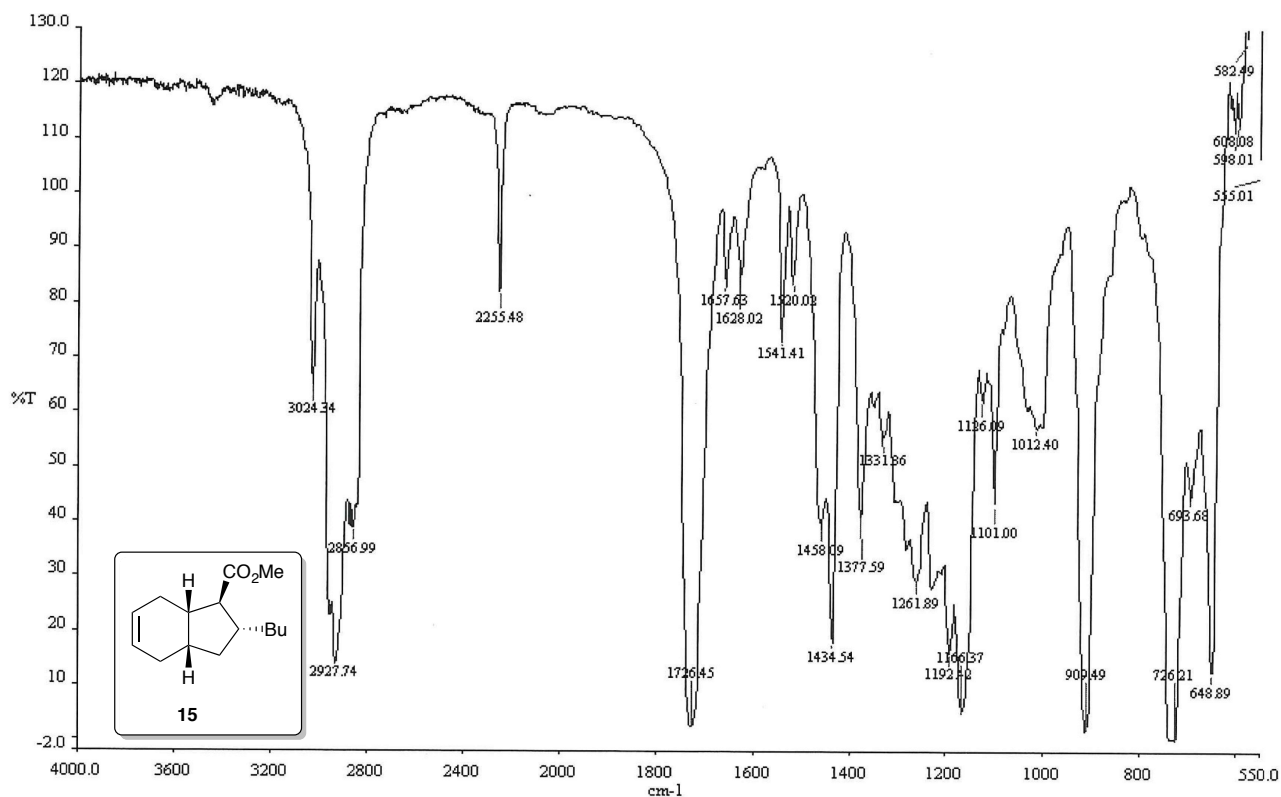

Figure S-52 IR of compound 15.

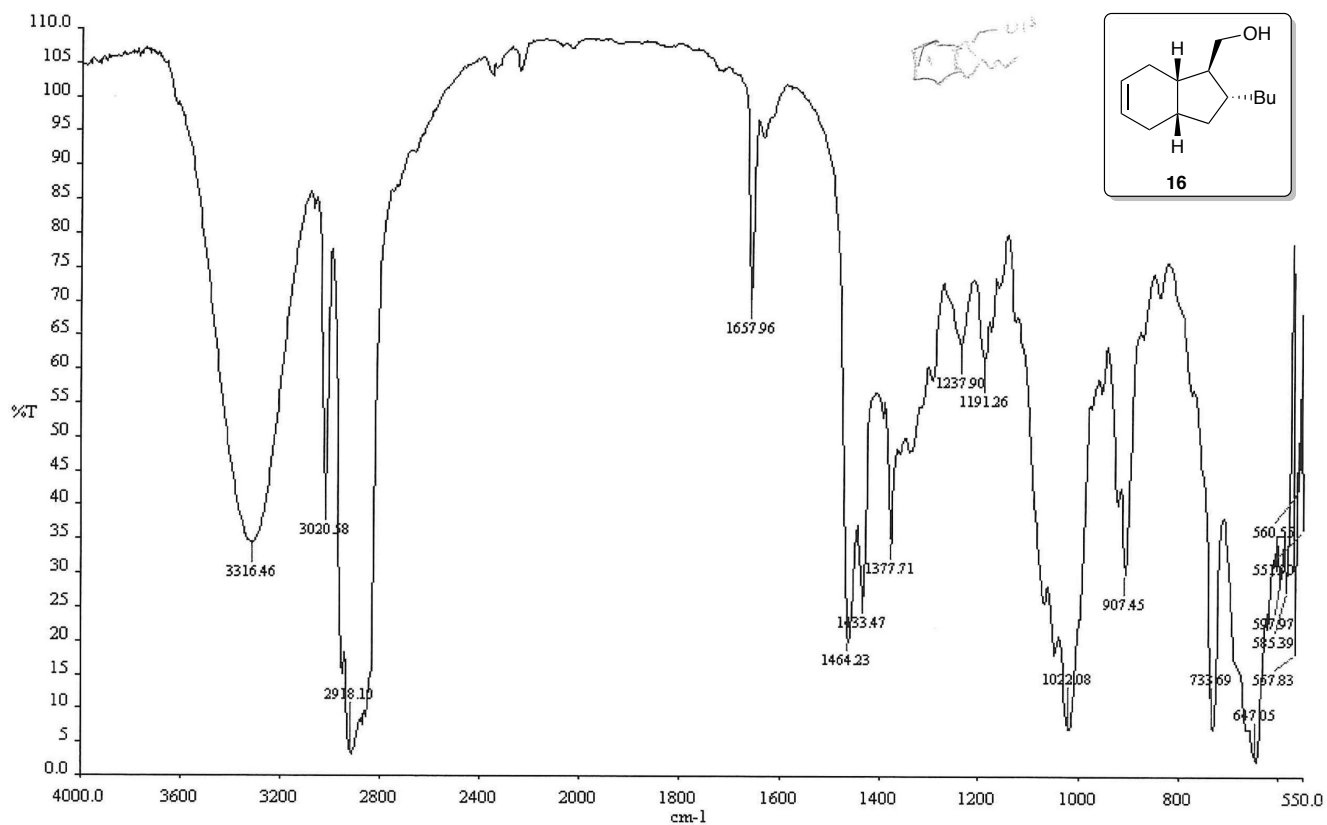

Figure S-53 IR of compound **16**.

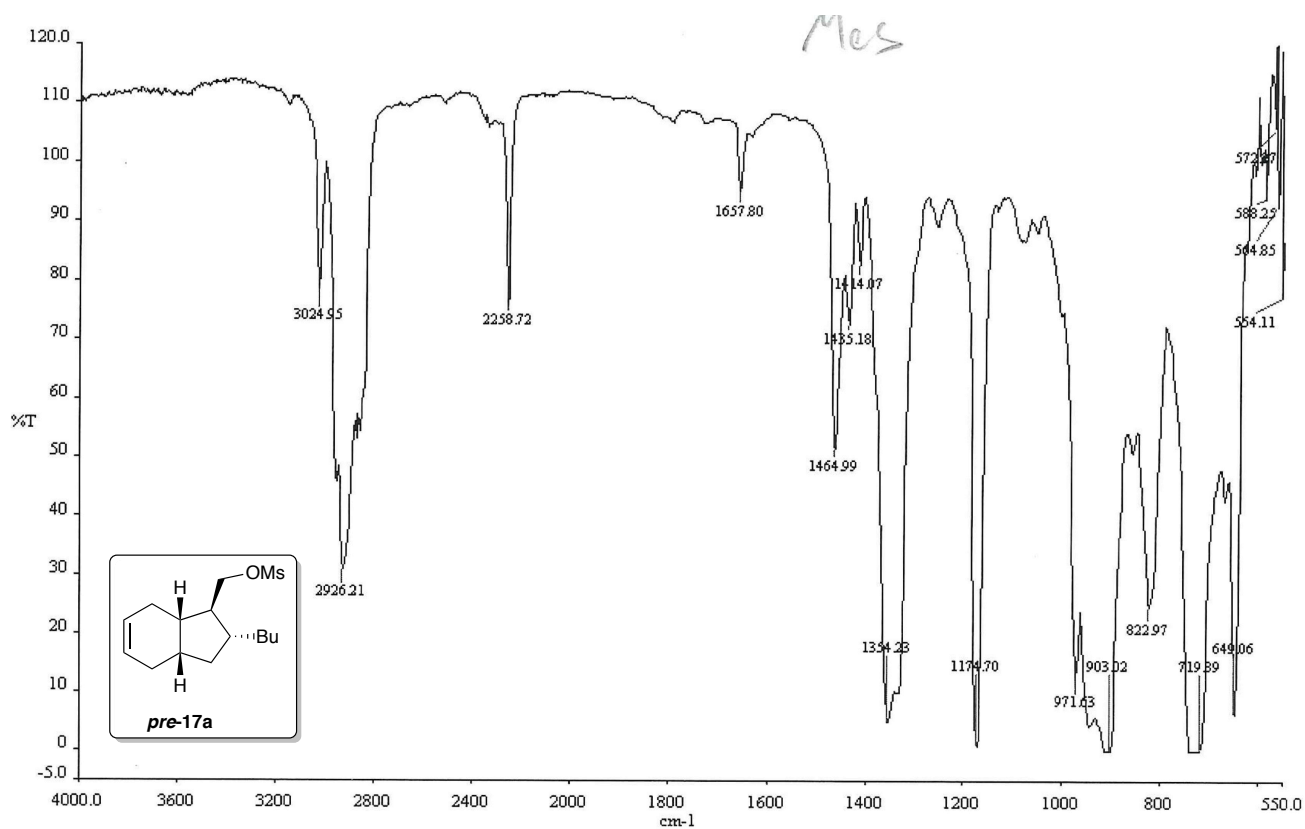

Figure S-54 IR of compound **pre-17a**.

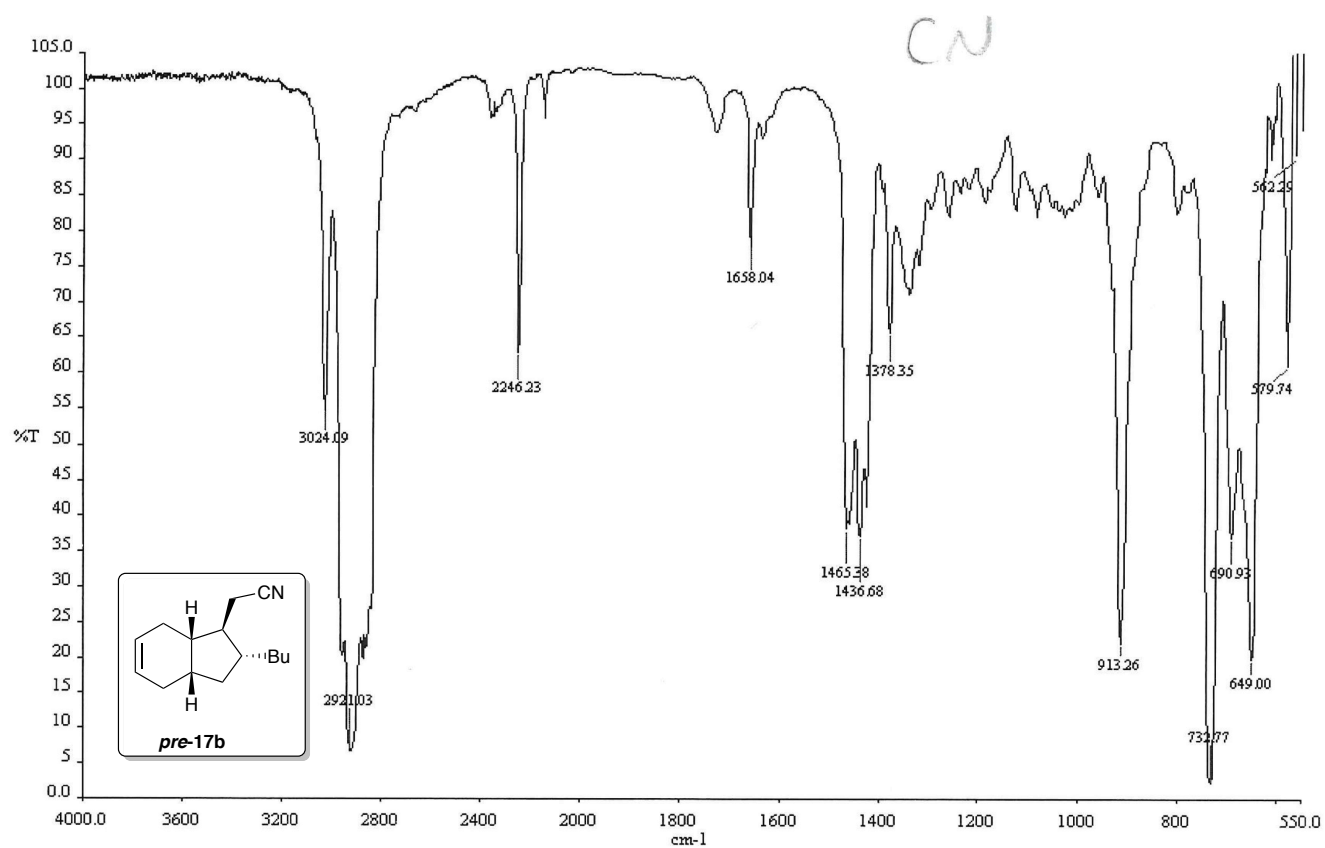

Figure S-55 IR of compound **pre-17b**.

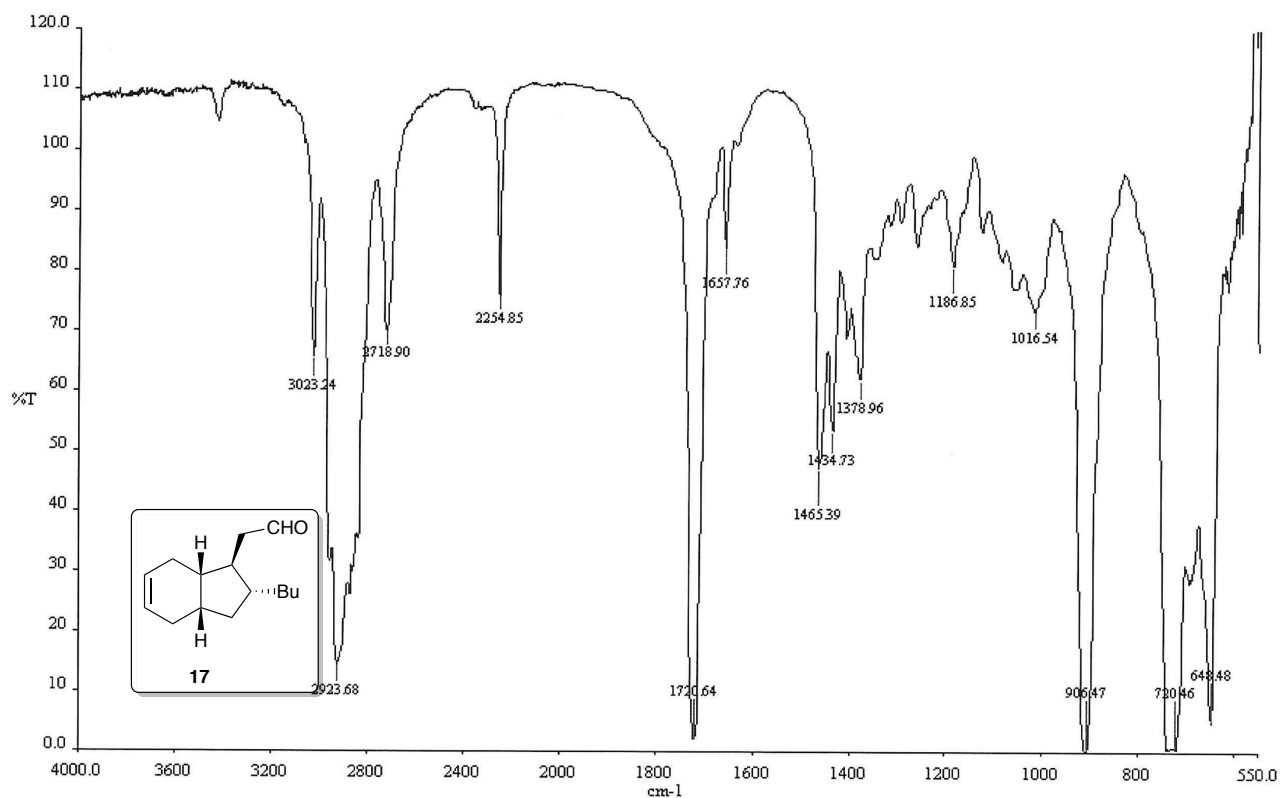

Figure S-56 IR of compound **17**.

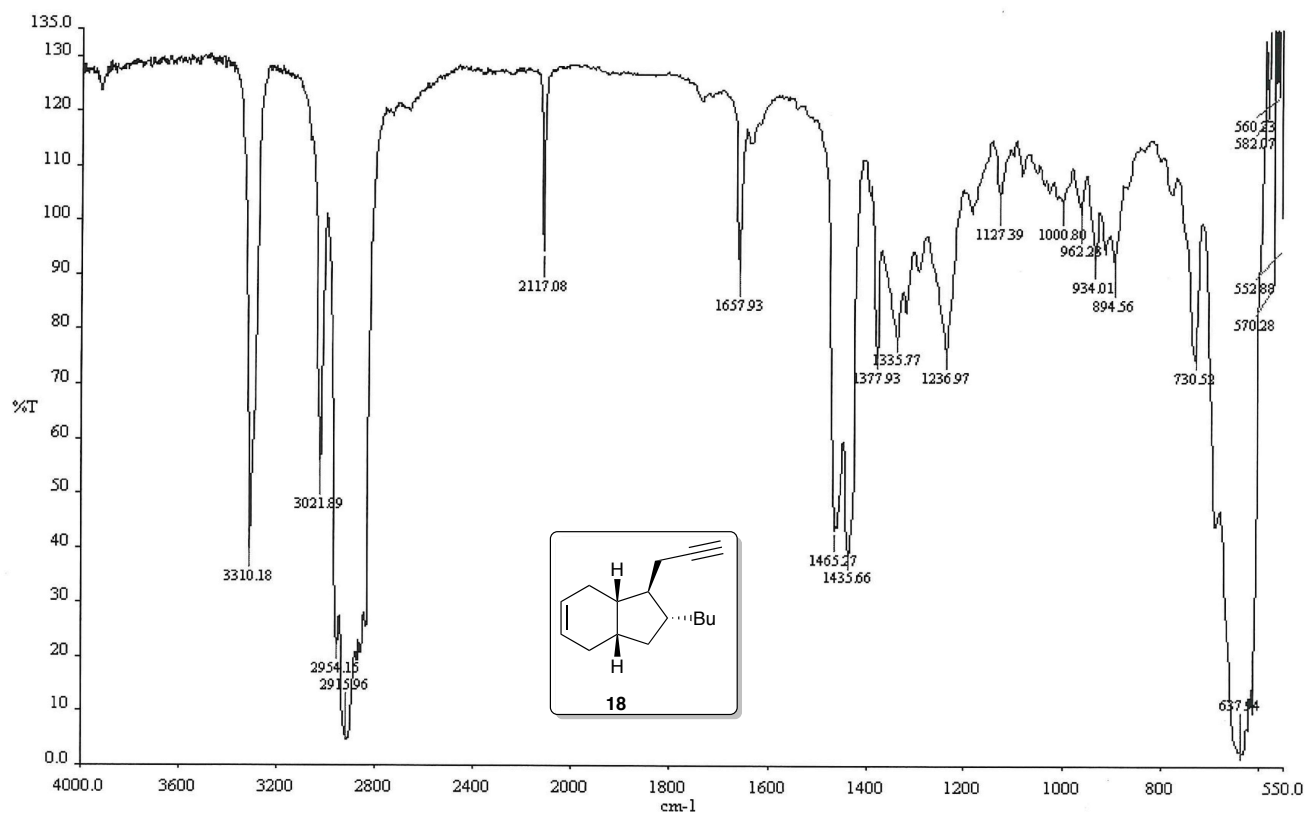

Figure S-57 IR of compound **18**.

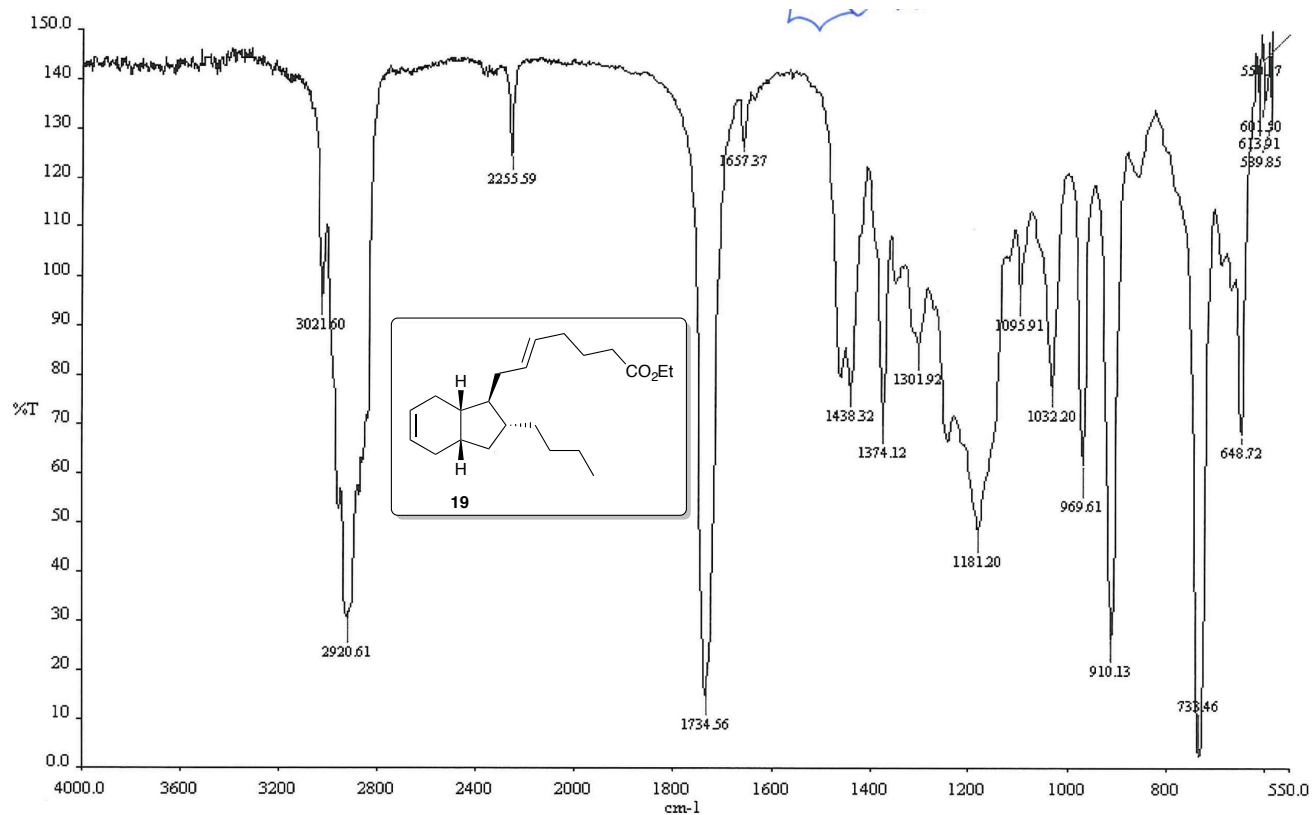

Figure S-58 IR of compound **19**.

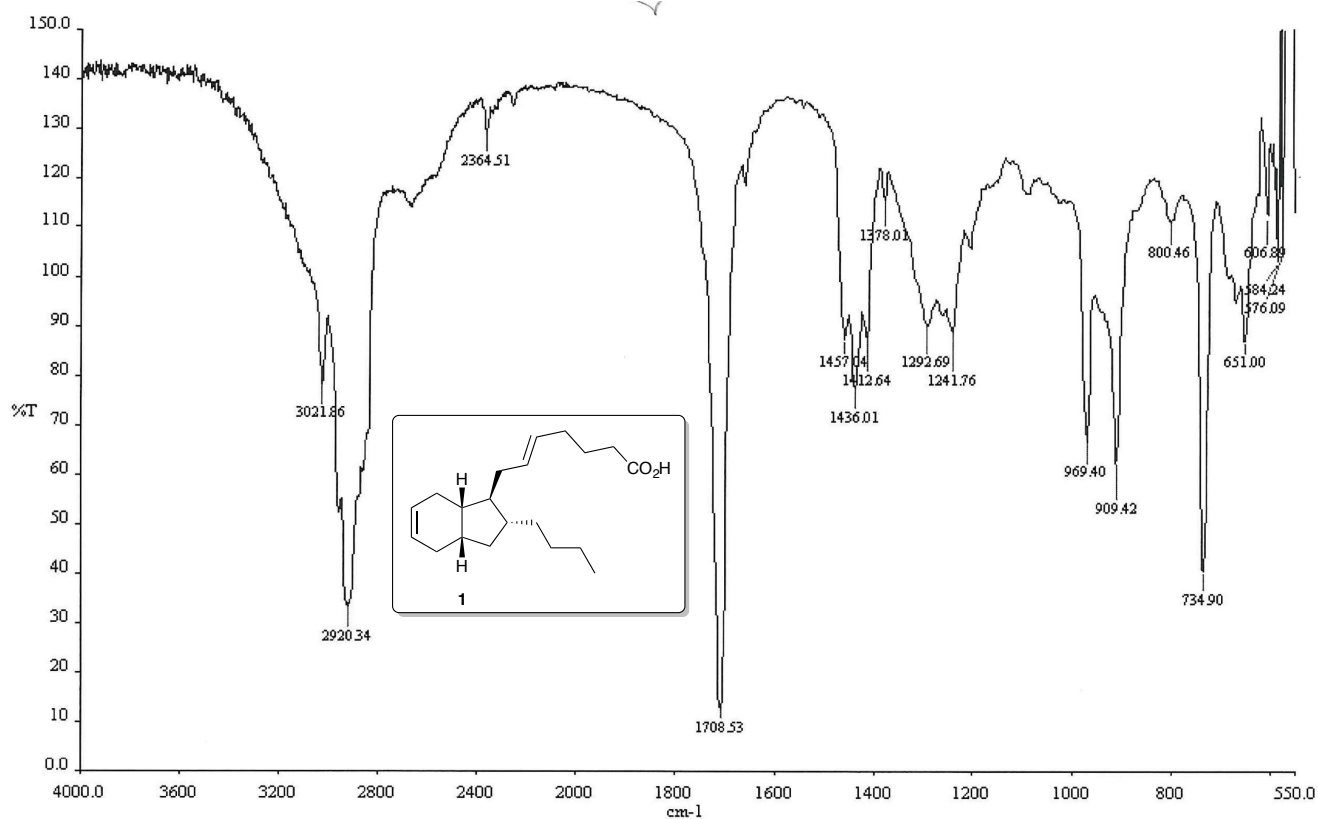

Figure S-59 IR of compound 1.

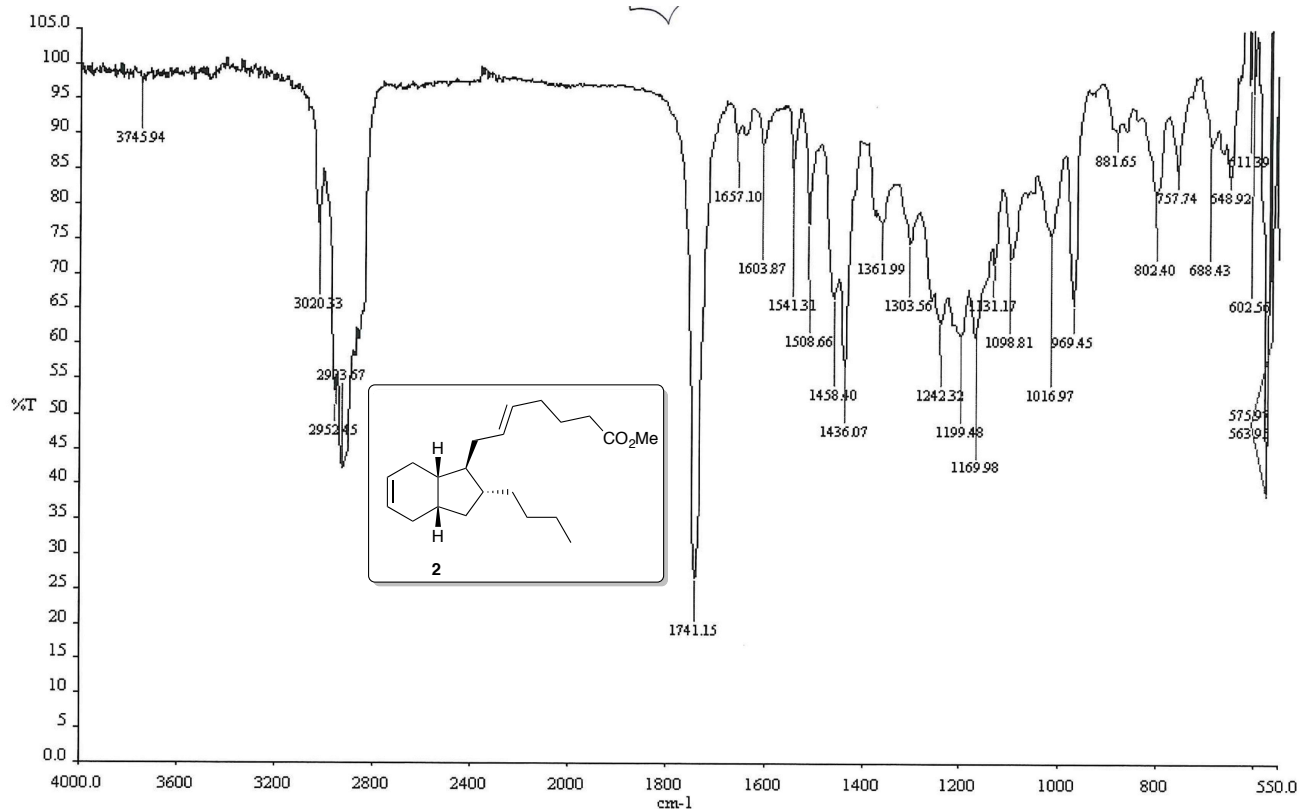

Figure S-60 IR of compound 2.

Sample Name: RAC

=====

Acq. Operator : SYSTEM  
 Sample Operator : SYSTEM  
 Acq. Instrument : 7820 GC Location : Vial 1  
 Injection Date : 5/2/2016 15:28:06

Inj Volume : Manually

Method : C:\CHEM32\1\METHODS\CP7502\CP7502.M  
 Last changed : 5/2/2016 14:05:55 by SYSTEM  
 Sample Info : 80 grader 30 min, 3 grader/min til 150 grader, 5 min hold time

Additional Info : Peak(s) manually integrated

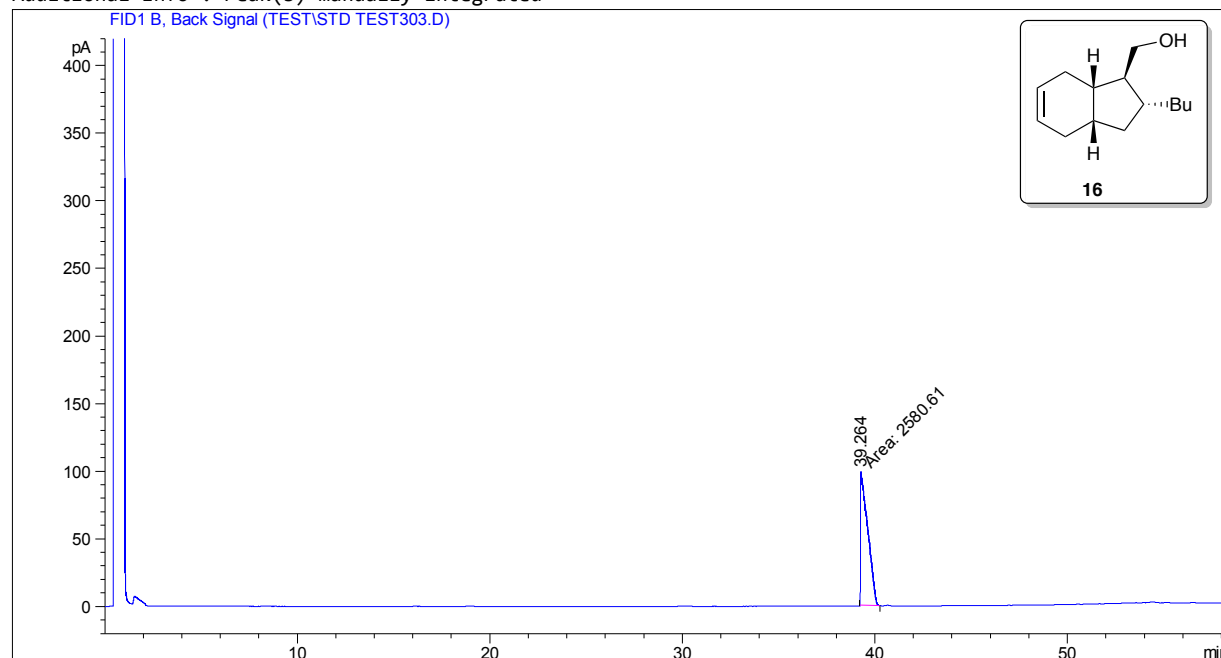

=====

External Standard Report

=====

Sorted By : Signal  
 Calib. Data Modified : Tuesday, August 20, 2013 11:04:49  
 Multiplier : 1.0000  
 Dilution : 1.0000  
 Do not use Multiplier & Dilution Factor with ISTDs

Signal 1: FID1 B, Back Signal

| RetTime<br>[min] | Type | Area<br>[pA*s] | Amt/Area | Amount<br>[ng/ul] | Grp | Name       |
|------------------|------|----------------|----------|-------------------|-----|------------|
| 3.710            | -    | -              | -        | -                 | -   | tridekan   |
| 4.351            | -    | -              | -        | -                 | -   | tetradekan |
| 4.970            | -    | -              | -        | -                 | -   | pentadekan |
| 5.557            | -    | -              | -        | -                 | -   | hexadekan  |

Totals : 0.00000

Figure S-61 Chiral GLC of compound 16.



Sample Name: RAC

1 Warnings or Errors :

Warning : Calibrated compound(s) not found

=====

## Area Percent Report

=====

Sorted By : Signal  
 Calib. Data Modified : Tuesday, August 20, 2013 11:04:49  
 Multiplier : 1.0000  
 Dilution : 1.0000  
 Do not use Multiplier & Dilution Factor with ISTDs

Signal 1: FID1 B, Back Signal

| Peak # | RetTime [min] | Type | Width [min] | Area [pA*s] | Area %  | Name       |
|--------|---------------|------|-------------|-------------|---------|------------|
| 1      | 3.710         |      | 0.0000      | 0.00000     | 0.00000 | tridekan   |
| 2      | 4.351         |      | 0.0000      | 0.00000     | 0.00000 | tetradekan |
| 3      | 4.970         |      | 0.0000      | 0.00000     | 0.00000 | pentadekan |
| 4      | 5.557         |      | 0.0000      | 0.00000     | 0.00000 | hexadekan  |
| 5      | 39.264 MM     |      | 0.4356      | 2580.60645  | 1.000e2 | ?          |

Totals : 2580.60645

1 Warnings or Errors :

Warning : Calibrated compound(s) not found

=====

\*\*\* End of Report \*\*\*

Sample Name: Rac fort 1:5

```

=====
Acq. Operator   : SYSTEM
Sample Operator : SYSTEM
Acq. Instrument : 7820 GC
Injection Date  : 5/10/2016 14:46:51
Location       : Vial 1
Inj Volume     : Manually

```

```

Method          : C:\CHEM32\1\METHODS\CP7502\CP7502.M
Last changed    : 5/2/2016 14:05:55 by SYSTEM
Sample Info     : 80 grader 30 min, 3 grader/min til 150 grader, 5 min hold time

```

Additional Info : Peak(s) manually integrated

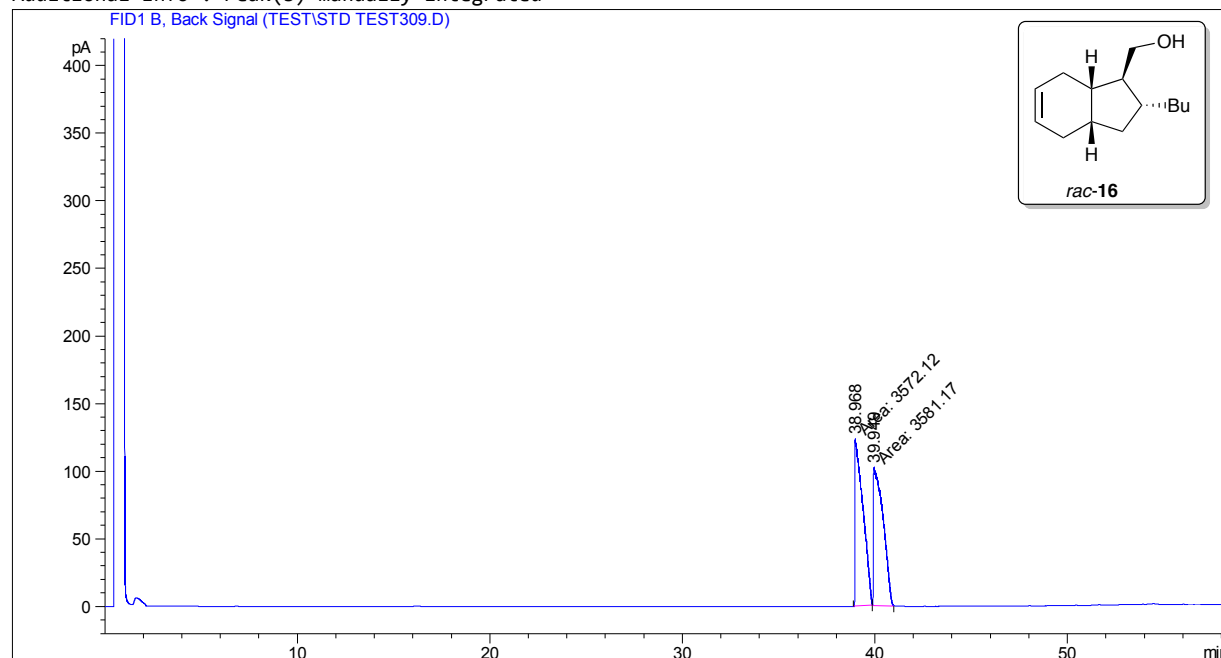

```

=====
External Standard Report
=====

```

```

Sorted By      : Signal
Calib. Data Modified : Tuesday, August 20, 2013 11:04:49
Multiplier     : 1.0000
Dilution       : 1.0000
Do not use Multiplier & Dilution Factor with ISTDs

```

Signal 1: FID1 B, Back Signal

| RetTime<br>[min] | Type | Area<br>[pA*s] | Amt/Area | Amount<br>[ng/ul] | Grp | Name       |
|------------------|------|----------------|----------|-------------------|-----|------------|
| 3.710            | -    | -              | -        | -                 | -   | tridekan   |
| 4.351            | -    | -              | -        | -                 | -   | tetradekan |
| 4.970            | -    | -              | -        | -                 | -   | pentadekan |
| 5.557            | -    | -              | -        | -                 | -   | hexadekan  |

Totals : 0.00000

Figure S-63 Chiral GLC of compound *rac*-16.

Sample Name: Rac fort 1:5

1 Warnings or Errors :

Warning : Calibrated compound(s) not found

=====

## Area Percent Report

=====

Sorted By : Signal  
 Calib. Data Modified : Tuesday, August 20, 2013 11:04:49  
 Multiplier : 1.0000  
 Dilution : 1.0000  
 Do not use Multiplier & Dilution Factor with ISTDs

Signal 1: FID1 B, Back Signal

| Peak # | RetTime [min] | Type | Width [min] | Area [pA*s] | Area %   | Name       |
|--------|---------------|------|-------------|-------------|----------|------------|
| 1      | 3.710         |      | 0.0000      | 0.00000     | 0.00000  | tridekan   |
| 2      | 4.351         |      | 0.0000      | 0.00000     | 0.00000  | tetradekan |
| 3      | 4.970         |      | 0.0000      | 0.00000     | 0.00000  | pentadekan |
| 4      | 5.557         |      | 0.0000      | 0.00000     | 0.00000  | hexadekan  |
| 5      | 38.968        | MM   | 0.4812      | 3572.11621  | 49.93671 | ?          |
| 6      | 39.949        | MM   | 0.5835      | 3581.17065  | 50.06329 | ?          |

Totals : 7153.28687

1 Warnings or Errors :

Warning : Calibrated compound(s) not found

=====

\*\*\* End of Report \*\*\*

### Preparation 3,5-dinitrobenzoate derivative of (**16**).

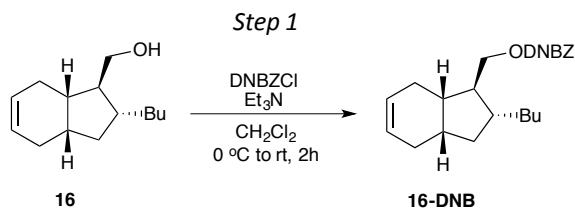

**Scheme S-3** Derivatization of advanced intermediate **16** to 2,5-dinitrobenzoate **16-DNB**.

**(1*S*,6*S*,7*S*,8*R*)-8-Butyl-7-((3,5-dinitrobenzoyl)oxymethyl)bicyclo[4.3.0]non-3-ene (**16-DNB**).**

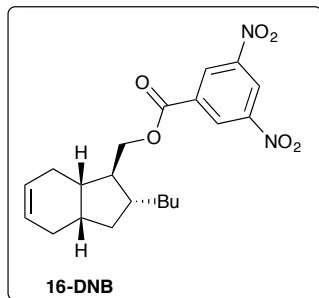

A stirring solution of (1*S*,6*S*,7*S*,8*R*)-8-butyl-7-(hydroxymethyl)bicyclo[4.3.0]non-3-ene **16** (120 mg, 0.577 mmol, 1.0 equiv.) in dry DCM (10 mL) was added Et<sub>3</sub>N (0.241 mL, 1.73 mmol, 3.0 equiv.) dropwise. The solution was then cooled to 0 °C and 3,5-dinitrobenzoyl chloride (173 mg, 0.75 mmol, 1.3 equiv.) was added in one portion. The reaction was slowly warmed to room temperature and monitored by TLC until completion. After 2h, the reaction mixture was poured over H<sub>2</sub>O (10 mL) and the organic layer separated. The aqueous layer was then extracted with DCM (2 x 10 mL) and the organic layers combined. The organic layers were then washed with H<sub>2</sub>O (1 x 30 mL), brine (1 x 30 mL), dried with MgSO<sub>4</sub>, filtered and concentrated *in vacuo* to form a crude orange oil. This was purified by column chromatography on silica (hexane/EtOAc, 95:5) to afford the title compound as a slightly off-white powder. Yield: 185 mg, (82%), [ $\alpha$ ]<sub>D</sub><sup>26</sup> -3.67 (c = 0.1, CHCl<sub>3</sub>); <sup>1</sup>H NMR (400 MHz, CDCl<sub>3</sub>)  $\delta$  9.25-9.24 (m, 1H), 9.16-9.15 (m, 2H), 5.74-5.67 (m, 2H), 4.45-4.37 (m, 2H), 2.27-2.14 (m, 3H), 2.01-1.90 (m, 4H), 1.85-1.79 (m, 1H), 1.74-1.68 (m, 1H), 1.66-1.60 (m, 1H), 1.42-1.19 (m, 6H), 0.89-0.88 (m, 3H); <sup>13</sup>C NMR (100 MHz, CDCl<sub>3</sub>)  $\delta$  162.6, 148.6, 134.1, 129.3 (2C), 126.2, 125.2, 122.3, 69.7, 50.0, 41.8, 38.7, 37.7, 37.2, 35.1, 30.9, 27.4, 27.3, 22.8, 14.0; IR (neat, cm<sup>-1</sup>) 3012 (m), 3022 (m), 2922 (s), 1728 (s), 1628 (m), 1597 (w), 1540 (s), 1460 (m); HRMS (EI<sup>+</sup>): Exact mass calculated for C<sub>21</sub>H<sub>26</sub>N<sub>2</sub>O<sub>6</sub> [*M*]<sup>+</sup>: 402.1791, found 402.1788; m.p.: 45-47 °C; TLC (hexane/EtOAc 9:1, KMnO<sub>4</sub> stain): R<sub>f</sub>=0.55.

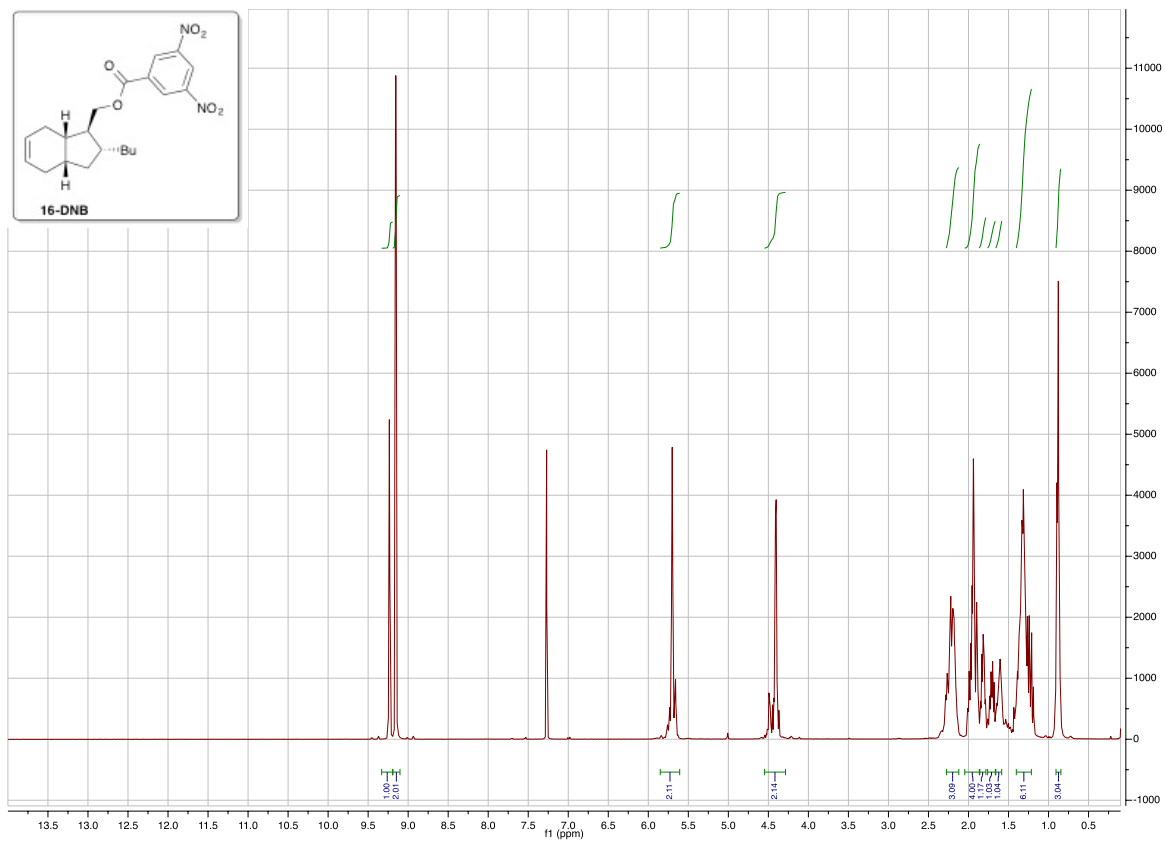

Figure S-65 <sup>1</sup>H-NMR spectrum of compound 16-DNB.

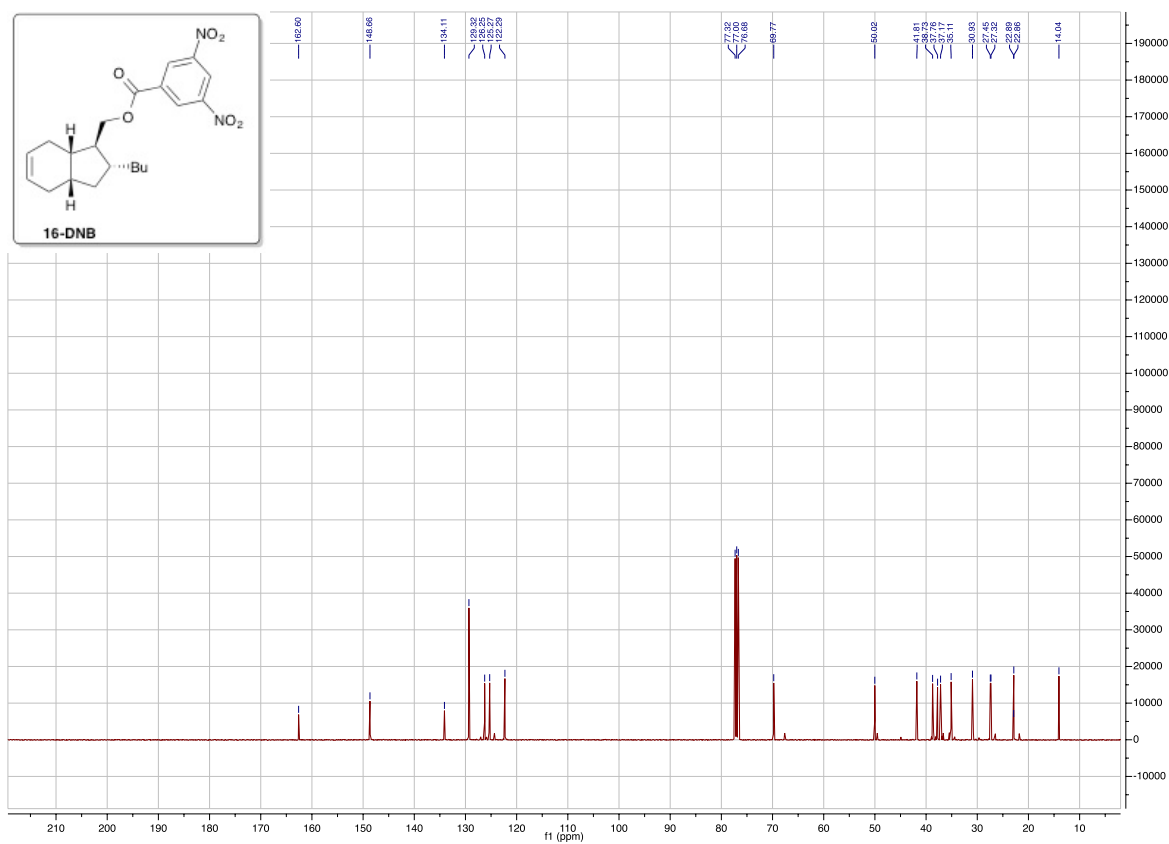

Figure S-66 <sup>13</sup>C-NMR spectrum of compound 16-DNB.

## Single Mass Analysis

Tolerance = 10.0 PPM / DBE: min = -1.5, max = 50.0

Isotope cluster parameters: Separation = 1.0 Abundance = 1.0%

Monoisotopic Mass, Odd and Even Electron Ions

23 formula(e) evaluated with 1 results within limits (up to 50 closest results for each mass)

DE2016060605 295 (5.925)

Voltage EI+

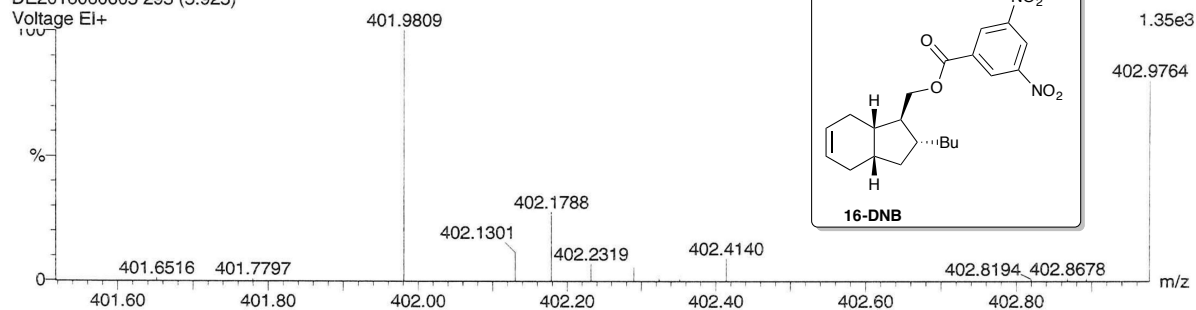

Minimum:

Maximum:

200.0

10.0

-1.5

50.0

Mass

Calc. Mass

mDa

PPM

DBE

Score

Formula

402.1788

402.1791

-0.3

-0.7

10.0

1

C21 H26 N2 O6

Figure S-67 HRMS spectrum of compound 16-DNB.

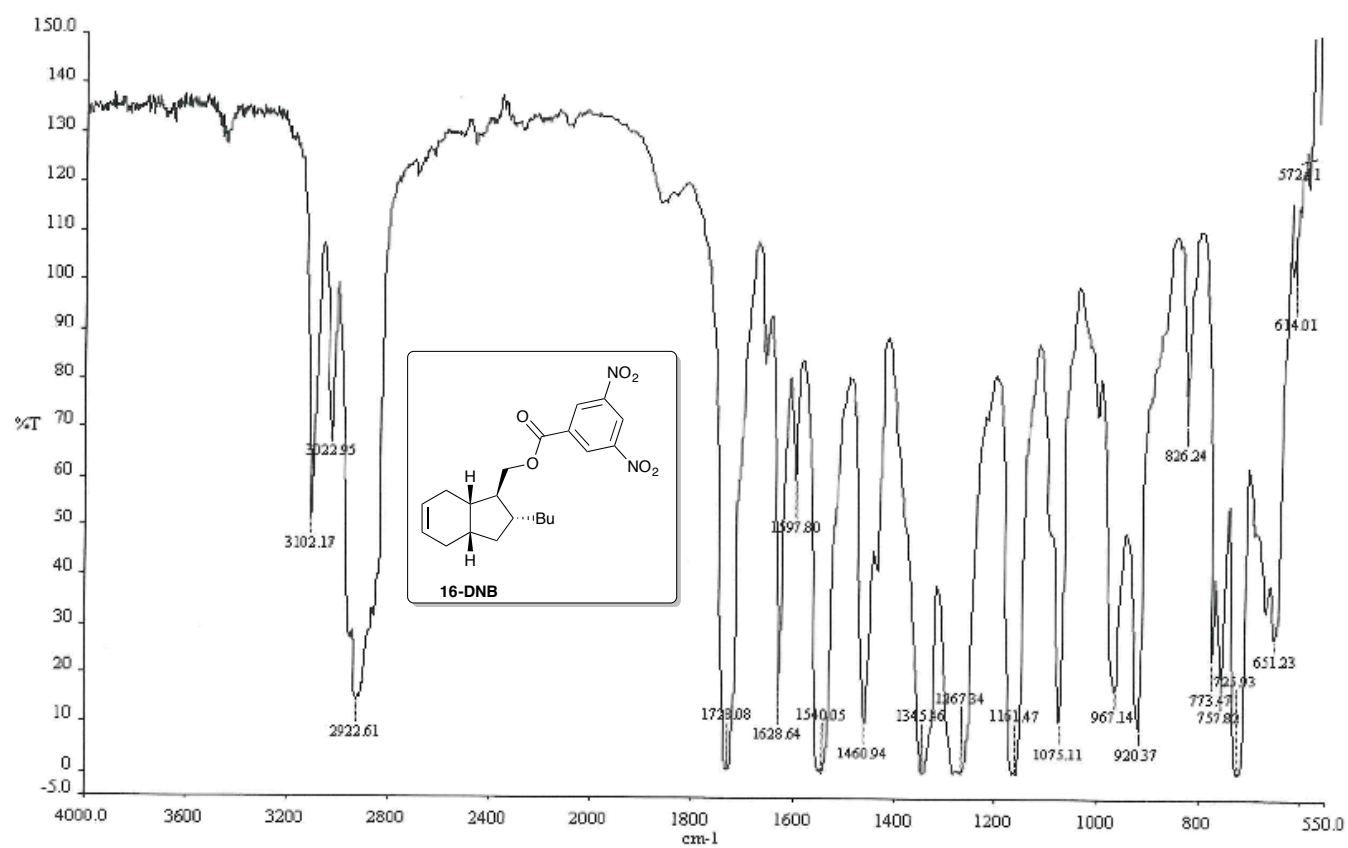

Figure S-68 IR spectrum of compound 16-DNB.

# X-ray crystallography on compound (16-DNB):

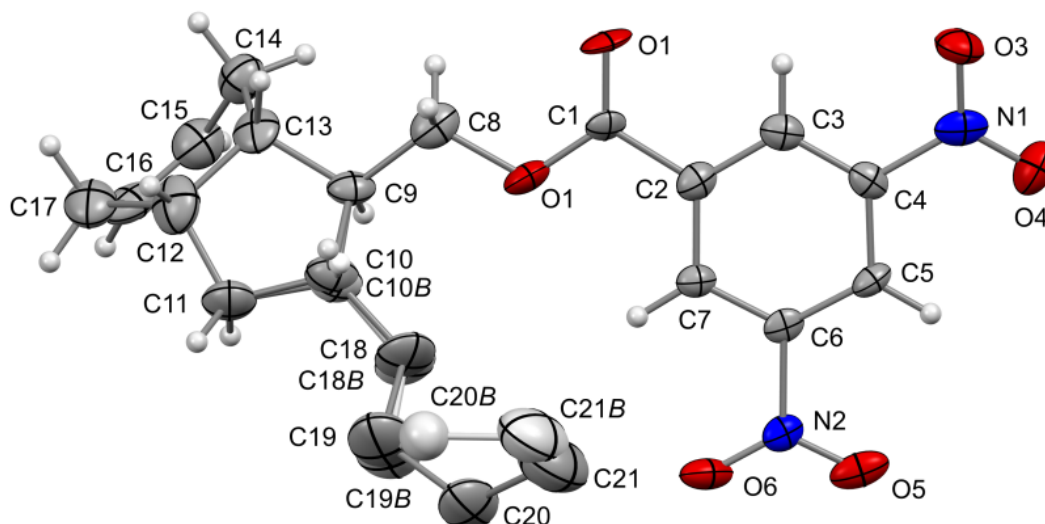

**Figure S-69** Single crystal X-ray structure of the 3,5-dinitrobenzoate of alcohol **16** at 110 K. The disordered n-butyl group (H-atoms omitted) has a major orientation [occupancy 0.74(3)] with *trans,trans,gauche+* torsion angles along C9-C10-C18-C19-C20-C21, while the minor orientation (atoms in lighter tone) is *trans,gauche-,gauche-*.

**Table S-1** Crystal data for 3,5-dinitrobenzoate of alcohol **16**.\*

| (I)                                                                                                                     |                                                               |
|-------------------------------------------------------------------------------------------------------------------------|---------------------------------------------------------------|
| Crystal data                                                                                                            |                                                               |
| Chemical formula                                                                                                        | C <sub>21</sub> H <sub>26</sub> N <sub>2</sub> O <sub>6</sub> |
| <i>M<sub>r</sub></i>                                                                                                    | 402.44                                                        |
| Crystal system, space group                                                                                             | Monoclinic, <i>P</i> 2 <sub>1</sub>                           |
| <i>a</i> (Å)                                                                                                            | 10.866(5)                                                     |
| <i>b</i> (Å)                                                                                                            | 5.196(2)                                                      |
| <i>c</i> (Å)                                                                                                            | 18.617(10)                                                    |
| $\beta$ (°)                                                                                                             | 106.703(11)                                                   |
| <i>V</i> (Å <sup>3</sup> )                                                                                              | 1006.8(9)                                                     |
| <i>Z</i>                                                                                                                | 2                                                             |
| Radiation                                                                                                               | Mo K $\alpha$                                                 |
| Wavelength (Å)                                                                                                          | 0.71073                                                       |
| $\mu$ (mm <sup>-1</sup> )                                                                                               | 0.098                                                         |
| Temperature (K)                                                                                                         | 110(2)                                                        |
| Crystal size (mm)                                                                                                       | 0.21 × 0.19 × 0.01                                            |
| <i>T<sub>min</sub></i> , <i>T<sub>max</sub></i>                                                                         | 0.692, 1.000                                                  |
| No. of measured, independent and observed [ <i>I</i> > 2 $\sigma$ ( <i>I</i> )] reflections                             | 5899, 2089, 1718                                              |
| <i>R<sub>int</sub></i>                                                                                                  | 0.140                                                         |
| $\theta_{max}$ (°)                                                                                                      | 20.86                                                         |
| Refinement                                                                                                              |                                                               |
| <i>R</i> [ <i>F</i> <sup>2</sup> > 2 $\sigma$ ( <i>F</i> <sup>2</sup> )], <i>wR</i> ( <i>F</i> <sup>2</sup> ), <i>S</i> | 0.085, 0.225, 1.03                                            |
| No. of reflections                                                                                                      | 2089                                                          |
| No. of parameters                                                                                                       | 278                                                           |
| $\Delta\rho_{max}$ , $\Delta\rho_{min}$ (e Å <sup>-3</sup> )                                                            | 0.30, -0.28                                                   |
| CCDC                                                                                                                    | 1484546                                                       |

\* Bruker D8 Venture diffractometer with InCoatec ImuS Microfocus radiation source and Photon 100 CMOS detector. Data collection with Apex2,<sup>1</sup> data integration and cell refinement with SAINT,<sup>1</sup> absorption correction by SADABS,<sup>1</sup> structure solution with SHELXT,<sup>2</sup> structure refinement with SHELXL.<sup>3</sup> Molecular graphics from Mercury.<sup>4</sup>



## supporting information

## First total synthesis of mucosin based on its structural assignment

Harrison C. Gallantree-Smith, Simen. G Antonsen, Carl Henrik Görbitz,\* Trond V. Hansen, Jens M. J. Nolsøe and Yngve H. Stenstrøm

## Experimental

Very fragile, small platelets were obtained by slow evaporation from a methanol/pentane mixture.

## Refinement

Two disorder positions, with occupancies 0.74 (3) and 0.26 (3) were refined for the C18—C21 n-butyl group attached to C10. Their covalent geometries were restrained by a SHELXL SAME 0.004 0.008 command, additional restraints were imposed on the C—C bond lengths in this substituent. Corresponding atoms in the two conformations shared the same displacement parameters, except that a fixed value was used for C20B, which is separated from C20 by 1.38 Å.

## name

## Crystal data

$C_{21}H_{26}N_2O_6$   
 $M_r = 402.44$   
 Monoclinic,  $P2_1$   
 $a = 10.866$  (5) Å  
 $b = 5.196$  (2) Å  
 $c = 18.617$  (10) Å  
 $\beta = 106.703$  (11)°  
 $V = 1006.8$  (9) Å<sup>3</sup>  
 $Z = 2$

$F(000) = 428$   
 $D_x = 1.327$  Mg m<sup>-3</sup>  
 Mo  $K\alpha$  radiation,  $\lambda = 0.71073$  Å  
 Cell parameters from 2295 reflections  
 $\theta = 2.3$ – $20.9^\circ$   
 $\mu = 0.10$  mm<sup>-1</sup>  
 $T = 110$  K  
 Plate, colourless  
 $0.21 \times 0.19 \times 0.01$  mm

## Data collection

Bruker D8 Venture with Photon 100 CMOS detector  
 diffractometer  
 Radiation source: InCoatec ImuS Microfocus  
 Graphite monochromator  
 Detector resolution: 8.3 pixels mm<sup>-1</sup>  
 Sets of exposures each taken over  $0.5^\circ$   $\omega$  rotation  
 scans  
 Absorption correction: multi-scan  
 SADABS (Bruker, 2014)

$T_{\min} = 0.692$ ,  $T_{\max} = 1.000$   
 5899 measured reflections  
 2089 independent reflections  
 1718 reflections with  $I > 2\sigma(I)$   
 $R_{\text{int}} = 0.214$   
 $\theta_{\max} = 20.9^\circ$ ,  $\theta_{\min} = 2.3^\circ$   
 $h = -10 \rightarrow 10$   
 $k = -5 \rightarrow 5$   
 $l = -18 \rightarrow 18$

## Refinement

Refinement on  $F^2$   
 Least-squares matrix: full  
 $R[F^2 > 2\sigma(F^2)] = 0.085$   
 $wR(F^2) = 0.225$   
 $S = 1.03$   
 2089 reflections  
 278 parameters  
 77 restraints

Primary atom site location: structure-invariant direct  
 methods  
 Secondary atom site location: difference Fourier map  
 Hydrogen site location: inferred from neighbouring  
 sites  
 H-atom parameters constrained  
 $w = 1/[\sigma^2(F_o^2) + (0.0936P)^2 + 2.6032P]$   
 where  $P = (F_o^2 + 2F_c^2)/3$

## supporting information

$$(\Delta/\sigma)_{\max} < 0.001$$

$$\Delta\rho_{\max} = 0.30 \text{ e } \text{\AA}^{-3}$$

$$\Delta\rho_{\min} = -0.28 \text{ e } \text{\AA}^{-3}$$

### Special details

**Geometry.** All esds (except the esd in the dihedral angle between two l.s. planes) are estimated using the full covariance matrix. The cell esds are taken into account individually in the estimation of esds in distances, angles and torsion angles; correlations between esds in cell parameters are only used when they are defined by crystal symmetry. An approximate (isotropic) treatment of cell esds is used for estimating esds involving l.s. planes.

**Refinement.** Two disorder positions refined for n-butyl group attached to C10. Occupancies 0.74 (3) and 0.26 (3).

### Fractional atomic coordinates and isotropic or equivalent isotropic displacement parameters ( $\text{\AA}^2$ )

|      | x           | y           | z           | $U_{\text{iso}}^*/U_{\text{eq}}$ | Occ. (<1) |
|------|-------------|-------------|-------------|----------------------------------|-----------|
| O1   | 0.4965 (7)  | 0.0115 (19) | 0.3931 (4)  | 0.034 (2)                        |           |
| N1   | 0.7700 (10) | 0.288 (2)   | 0.6525 (7)  | 0.034 (3)                        |           |
| C1   | 0.5467 (10) | 0.212 (3)   | 0.3832 (7)  | 0.023 (3)                        |           |
| O2   | 0.5244 (7)  | 0.3323 (19) | 0.3180 (5)  | 0.032 (2)                        |           |
| N2   | 0.8755 (9)  | 0.896 (2)   | 0.4771 (7)  | 0.025 (2)                        |           |
| C2   | 0.6411 (11) | 0.353 (3)   | 0.4451 (7)  | 0.028 (3)                        |           |
| O3   | 0.7262 (8)  | 0.077 (2)   | 0.6594 (5)  | 0.040 (2)                        |           |
| C3   | 0.6602 (11) | 0.265 (2)   | 0.5163 (7)  | 0.028 (3)                        |           |
| H31  | 0.6121      | 0.1220      | 0.5254      | 0.033*                           |           |
| C4   | 0.7491 (10) | 0.382 (3)   | 0.5752 (6)  | 0.025 (3)                        |           |
| O4   | 0.8317 (8)  | 0.420 (2)   | 0.7046 (5)  | 0.044 (2)                        |           |
| C5   | 0.8206 (10) | 0.596 (2)   | 0.5648 (7)  | 0.024 (3)                        |           |
| H51  | 0.8798      | 0.6815      | 0.6053      | 0.029*                           |           |
| O5   | 0.9445 (7)  | 1.0018 (19) | 0.5311 (5)  | 0.039 (2)                        |           |
| C6   | 0.7990 (10) | 0.672 (2)   | 0.4921 (7)  | 0.021 (3)                        |           |
| O6   | 0.8619 (7)  | 0.9540 (18) | 0.4128 (5)  | 0.036 (2)                        |           |
| C7   | 0.7120 (10) | 0.562 (2)   | 0.4316 (6)  | 0.023 (3)                        |           |
| H71  | 0.7003      | 0.6265      | 0.3823      | 0.028*                           |           |
| C8   | 0.4292 (12) | 0.208 (3)   | 0.2553 (7)  | 0.036 (3)                        |           |
| H81  | 0.3491      | 0.1772      | 0.2692      | 0.044*                           |           |
| H82  | 0.4626      | 0.0397      | 0.2445      | 0.044*                           |           |
| C12  | 0.3164 (15) | 0.342 (3)   | 0.0499 (8)  | 0.055 (4)                        |           |
| H121 | 0.3329      | 0.1800      | 0.0253      | 0.066*                           |           |
| C13  | 0.2879 (13) | 0.270 (3)   | 0.1245 (7)  | 0.041 (4)                        |           |
| H131 | 0.2890      | 0.0776      | 0.1285      | 0.049*                           |           |
| C14  | 0.1617 (12) | 0.364 (3)   | 0.1326 (8)  | 0.046 (4)                        |           |
| H141 | 0.0929      | 0.2417      | 0.1076      | 0.055*                           |           |
| H142 | 0.1663      | 0.3703      | 0.1865      | 0.055*                           |           |
| C15  | 0.1292 (13) | 0.625 (3)   | 0.0990 (9)  | 0.050 (4)                        |           |
| H151 | 0.0928      | 0.7505      | 0.1241      | 0.059*                           |           |
| C16  | 0.1501 (12) | 0.682 (3)   | 0.0365 (10) | 0.049 (4)                        |           |
| H161 | 0.1334      | 0.8508      | 0.0167      | 0.059*                           |           |
| C17  | 0.2006 (14) | 0.483 (3)   | −0.0052 (8) | 0.053 (4)                        |           |
| H171 | 0.2286      | 0.5653      | −0.0458     | 0.063*                           |           |
| H172 | 0.1321      | 0.3573      | −0.0281     | 0.063*                           |           |
| C9   | 0.4010 (11) | 0.375 (3)   | 0.1869 (7)  | 0.032 (3)                        | 0.74 (3)  |
| H91  | 0.3797      | 0.5522      | 0.2003      | 0.038*                           | 0.74 (3)  |
| C11  | 0.4409 (12) | 0.494 (3)   | 0.0739 (8)  | 0.048 (4)                        | 0.74 (3)  |
| H111 | 0.4230      | 0.6802      | 0.0769      | 0.058*                           | 0.74 (3)  |

## supporting information

|      |             |           |             |            |          |
|------|-------------|-----------|-------------|------------|----------|
| H112 | 0.4911      | 0.4696    | 0.0377      | 0.058*     | 0.74 (3) |
| C10  | 0.5144 (12) | 0.391 (4) | 0.1509 (8)  | 0.044 (4)  | 0.74 (3) |
| H10  | 0.5419      | 0.2108    | 0.1440      | 0.053*     | 0.74 (3) |
| C18  | 0.6307 (14) | 0.537 (6) | 0.1938 (9)  | 0.060 (6)  | 0.74 (3) |
| H181 | 0.6668      | 0.4529    | 0.2431      | 0.072*     | 0.74 (3) |
| H182 | 0.6039      | 0.7130    | 0.2033      | 0.072*     | 0.74 (3) |
| C19  | 0.7354 (15) | 0.558 (7) | 0.1554 (11) | 0.084 (7)  | 0.74 (3) |
| H191 | 0.7465      | 0.3889    | 0.1335      | 0.101*     | 0.74 (3) |
| H192 | 0.7092      | 0.6839    | 0.1139      | 0.101*     | 0.74 (3) |
| C20  | 0.8620 (16) | 0.641 (4) | 0.2089 (12) | 0.067 (8)  | 0.74 (3) |
| H201 | 0.8470      | 0.8021    | 0.2333      | 0.081*     | 0.74 (3) |
| H202 | 0.9211      | 0.6827    | 0.1787      | 0.081*     | 0.74 (3) |
| C21  | 0.932 (4)   | 0.453 (7) | 0.271 (2)   | 0.096 (13) | 0.74 (3) |
| H211 | 1.0170      | 0.5212    | 0.2964      | 0.145*     | 0.74 (3) |
| H212 | 0.9403      | 0.2862    | 0.2482      | 0.145*     | 0.74 (3) |
| H213 | 0.8819      | 0.4328    | 0.3066      | 0.145*     | 0.74 (3) |
| C9B  | 0.4010 (11) | 0.375 (3) | 0.1869 (7)  | 0.032 (3)  | 0.26 (3) |
| H91B | 0.3750      | 0.5474    | 0.2013      | 0.038*     | 0.26 (3) |
| C11B | 0.4409 (12) | 0.494 (3) | 0.0739 (8)  | 0.048 (4)  | 0.26 (3) |
| H11B | 0.4217      | 0.6809    | 0.0720      | 0.058*     | 0.26 (3) |
| H12B | 0.4929      | 0.4588    | 0.0392      | 0.058*     | 0.26 (3) |
| C10B | 0.5162 (13) | 0.418 (5) | 0.1535 (9)  | 0.044 (4)  | 0.26 (3) |
| H10B | 0.5570      | 0.2473    | 0.1510      | 0.053*     | 0.26 (3) |
| C18B | 0.619 (2)   | 0.598 (8) | 0.1954 (11) | 0.060 (6)  | 0.26 (3) |
| H18B | 0.6533      | 0.5355    | 0.2476      | 0.072*     | 0.26 (3) |
| H19B | 0.5803      | 0.7695    | 0.1975      | 0.072*     | 0.26 (3) |
| C19B | 0.730 (3)   | 0.630 (9) | 0.162 (3)   | 0.084 (7)  | 0.26 (3) |
| H20B | 0.6960      | 0.6514    | 0.1073      | 0.101*     | 0.26 (3) |
| H21B | 0.7786      | 0.7876    | 0.1829      | 0.101*     | 0.26 (3) |
| C20B | 0.820 (3)   | 0.402 (9) | 0.179 (3)   | 0.050*     | 0.26 (3) |
| H22B | 0.8733      | 0.4081    | 0.1438      | 0.060*     | 0.26 (3) |
| H23B | 0.7673      | 0.2438    | 0.1673      | 0.060*     | 0.26 (3) |
| C21B | 0.911 (13)  | 0.37 (3)  | 0.258 (5)   | 0.096 (13) | 0.26 (3) |
| H24B | 0.9659      | 0.2227    | 0.2605      | 0.145*     | 0.26 (3) |
| H25B | 0.8605      | 0.3521    | 0.2939      | 0.145*     | 0.26 (3) |
| H26B | 0.9645      | 0.5281    | 0.2714      | 0.145*     | 0.26 (3) |

### Atomic displacement parameters ( $\text{\AA}^2$ )

|    | $U^{11}$  | $U^{22}$  | $U^{33}$  | $U^{12}$   | $U^{13}$  | $U^{23}$   |
|----|-----------|-----------|-----------|------------|-----------|------------|
| O1 | 0.026 (4) | 0.016 (5) | 0.058 (6) | −0.013 (4) | 0.011 (4) | −0.002 (4) |
| N1 | 0.017 (6) | 0.025 (7) | 0.061 (9) | 0.008 (5)  | 0.014 (6) | 0.009 (6)  |
| C1 | 0.011 (5) | 0.026 (5) | 0.034 (6) | 0.001 (5)  | 0.008 (4) | 0.002 (5)  |
| O2 | 0.020 (4) | 0.027 (5) | 0.047 (6) | −0.008 (4) | 0.005 (4) | −0.005 (4) |
| N2 | 0.017 (4) | 0.019 (5) | 0.037 (5) | 0.006 (4)  | 0.005 (4) | 0.001 (5)  |
| C2 | 0.021 (5) | 0.023 (5) | 0.037 (6) | 0.004 (5)  | 0.005 (5) | 0.000 (5)  |
| O3 | 0.045 (5) | 0.031 (6) | 0.047 (6) | −0.004 (5) | 0.017 (5) | 0.012 (4)  |
| C3 | 0.024 (5) | 0.023 (5) | 0.038 (6) | 0.006 (4)  | 0.013 (5) | 0.004 (5)  |
| C4 | 0.022 (5) | 0.025 (5) | 0.030 (6) | 0.009 (5)  | 0.011 (5) | 0.007 (5)  |
| O4 | 0.039 (5) | 0.043 (6) | 0.043 (6) | 0.002 (5)  | 0.000 (5) | −0.012 (5) |
| C5 | 0.017 (5) | 0.017 (5) | 0.035 (6) | −0.001 (4) | 0.003 (4) | −0.004 (5) |

YS.cif

sup-3

## supporting information

|      |            |            |            |             |            |             |
|------|------------|------------|------------|-------------|------------|-------------|
| O5   | 0.023 (5)  | 0.024 (5)  | 0.073 (7)  | 0.001 (4)   | 0.019 (5)  | −0.007 (5)  |
| C6   | 0.011 (5)  | 0.019 (5)  | 0.034 (6)  | 0.007 (4)   | 0.007 (4)  | 0.000 (4)   |
| O6   | 0.021 (4)  | 0.026 (5)  | 0.062 (7)  | 0.001 (4)   | 0.013 (4)  | 0.015 (4)   |
| C7   | 0.018 (5)  | 0.019 (5)  | 0.033 (6)  | 0.003 (4)   | 0.008 (5)  | 0.003 (5)   |
| C8   | 0.029 (7)  | 0.028 (7)  | 0.051 (9)  | 0.006 (6)   | 0.009 (7)  | −0.006 (7)  |
| C12  | 0.072 (12) | 0.044 (9)  | 0.045 (9)  | 0.003 (9)   | 0.011 (9)  | −0.014 (7)  |
| C13  | 0.057 (10) | 0.018 (7)  | 0.044 (8)  | −0.005 (6)  | 0.009 (7)  | −0.010 (6)  |
| C14  | 0.040 (8)  | 0.052 (9)  | 0.046 (9)  | −0.001 (7)  | 0.012 (7)  | −0.007 (8)  |
| C15  | 0.045 (9)  | 0.042 (10) | 0.059 (11) | 0.004 (7)   | 0.011 (9)  | −0.001 (8)  |
| C16  | 0.038 (9)  | 0.022 (8)  | 0.075 (12) | −0.005 (7)  | −0.004 (8) | 0.006 (8)   |
| C17  | 0.067 (10) | 0.029 (8)  | 0.057 (9)  | −0.006 (7)  | 0.010 (8)  | 0.000 (8)   |
| C9   | 0.029 (7)  | 0.021 (7)  | 0.047 (8)  | 0.001 (6)   | 0.014 (7)  | 0.005 (7)   |
| C11  | 0.035 (8)  | 0.060 (9)  | 0.057 (10) | −0.008 (8)  | 0.023 (7)  | 0.002 (8)   |
| C10  | 0.034 (8)  | 0.048 (9)  | 0.056 (10) | 0.001 (7)   | 0.021 (8)  | 0.006 (8)   |
| C18  | 0.029 (8)  | 0.089 (15) | 0.071 (10) | −0.013 (9)  | 0.028 (8)  | −0.007 (10) |
| C19  | 0.041 (10) | 0.132 (19) | 0.087 (13) | −0.005 (12) | 0.031 (9)  | 0.019 (13)  |
| C20  | 0.026 (12) | 0.099 (19) | 0.078 (17) | 0.002 (12)  | 0.016 (11) | 0.021 (14)  |
| C21  | 0.09 (2)   | 0.10 (3)   | 0.104 (19) | 0.00 (2)    | 0.029 (14) | 0.045 (19)  |
| C9B  | 0.029 (7)  | 0.021 (7)  | 0.047 (8)  | 0.001 (6)   | 0.014 (7)  | 0.005 (7)   |
| C11B | 0.035 (8)  | 0.060 (9)  | 0.057 (10) | −0.008 (8)  | 0.023 (7)  | 0.002 (8)   |
| C10B | 0.034 (8)  | 0.048 (9)  | 0.056 (10) | 0.001 (7)   | 0.021 (8)  | 0.006 (8)   |
| C18B | 0.029 (8)  | 0.089 (15) | 0.071 (10) | −0.013 (9)  | 0.028 (8)  | −0.007 (10) |
| C19B | 0.041 (10) | 0.132 (19) | 0.087 (13) | −0.005 (12) | 0.031 (9)  | 0.019 (13)  |
| C21B | 0.09 (2)   | 0.10 (3)   | 0.104 (19) | 0.00 (2)    | 0.029 (14) | 0.045 (19)  |

### Geometric parameters ( $\text{\AA}$ , $^\circ$ ) for (I)

|         |            |           |            |
|---------|------------|-----------|------------|
| O1—C1   | 1.213 (14) | C17—H171  | 0.9900     |
| N1—O3   | 1.218 (13) | C17—H172  | 0.9900     |
| N1—O4   | 1.219 (12) | C9—C10    | 1.565 (17) |
| N1—C4   | 1.474 (15) | C9—H91    | 1.0000     |
| C1—O2   | 1.326 (14) | C11—C10   | 1.524 (18) |
| C1—C2   | 1.498 (16) | C11—H111  | 0.9900     |
| O2—C8   | 1.467 (14) | C11—H112  | 0.9900     |
| N2—O5   | 1.202 (11) | C10—C18   | 1.495 (19) |
| N2—O6   | 1.202 (11) | C10—H10   | 1.0000     |
| N2—C6   | 1.502 (15) | C18—C19   | 1.512 (17) |
| C2—C3   | 1.361 (16) | C18—H181  | 0.9900     |
| C2—C7   | 1.397 (16) | C18—H182  | 0.9900     |
| C3—C4   | 1.377 (16) | C19—C20   | 1.51 (2)   |
| C3—H31  | 0.9500     | C19—H191  | 0.9900     |
| C4—C5   | 1.403 (15) | C19—H192  | 0.9900     |
| C5—C6   | 1.364 (16) | C20—C21   | 1.53 (2)   |
| C5—H51  | 0.9500     | C20—H201  | 0.9900     |
| C6—C7   | 1.368 (15) | C20—H202  | 0.9900     |
| C7—H71  | 0.9500     | C21—H211  | 0.9800     |
| C8—C9   | 1.497 (17) | C21—H212  | 0.9800     |
| C8—H81  | 0.9900     | C21—H213  | 0.9800     |
| C8—H82  | 0.9900     | C10B—C18B | 1.50 (2)   |
| C12—C11 | 1.52 (2)   | C10B—H10B | 1.0000     |
| C12—C13 | 1.55 (2)   | C18B—C19B | 1.512 (18) |

## supporting information

|              |            |               |            |
|--------------|------------|---------------|------------|
| C12—C17      | 1.558 (19) | C18B—H18B     | 0.9900     |
| C12—H121     | 1.0000     | C18B—H19B     | 0.9900     |
| C13—C14      | 1.504 (19) | C19B—C20B     | 1.51 (2)   |
| C13—C9       | 1.530 (17) | C19B—H20B     | 0.9900     |
| C13—H131     | 1.0000     | C19B—H21B     | 0.9900     |
| C14—C15      | 1.49 (2)   | C20B—C21B     | 1.53 (2)   |
| C14—H141     | 0.9900     | C20B—H22B     | 0.9900     |
| C14—H142     | 0.9900     | C20B—H23B     | 0.9900     |
| C15—C16      | 1.28 (2)   | C21B—H24B     | 0.9800     |
| C15—H151     | 0.9500     | C21B—H25B     | 0.9800     |
| C16—C17      | 1.49 (2)   | C21B—H26B     | 0.9800     |
| C16—H161     | 0.9500     |               |            |
| O3—N1—O4     | 124.5 (11) | C13—C9—C10    | 104.6 (10) |
| O3—N1—C4     | 116.4 (11) | C8—C9—H91     | 109.0      |
| O4—N1—C4     | 119.0 (10) | C13—C9—H91    | 109.0      |
| O1—C1—O2     | 125.0 (11) | C10—C9—H91    | 109.0      |
| O1—C1—C2     | 122.8 (11) | C12—C11—C10   | 105.9 (11) |
| O2—C1—C2     | 112.2 (10) | C12—C11—H111  | 110.5      |
| C1—O2—C8     | 114.9 (9)  | C10—C11—H111  | 110.5      |
| O5—N2—O6     | 125.9 (10) | C12—C11—H112  | 110.5      |
| O5—N2—C6     | 116.5 (10) | C10—C11—H112  | 110.5      |
| O6—N2—C6     | 117.7 (10) | H111—C11—H112 | 108.7      |
| C3—C2—C7     | 120.0 (11) | C18—C10—C11   | 117.2 (12) |
| C3—C2—C1     | 117.6 (11) | C18—C10—C9    | 116.5 (11) |
| C7—C2—C1     | 122.3 (11) | C11—C10—C9    | 99.0 (10)  |
| C2—C3—C4     | 120.2 (11) | C18—C10—H10   | 107.8      |
| C2—C3—H31    | 119.9      | C11—C10—H10   | 107.8      |
| C4—C3—H31    | 119.9      | C9—C10—H10    | 107.8      |
| C3—C4—C5     | 122.0 (11) | C10—C18—C19   | 114.7 (13) |
| C3—C4—N1     | 120.6 (11) | C10—C18—H181  | 108.6      |
| C5—C4—N1     | 117.5 (10) | C19—C18—H181  | 108.6      |
| C6—C5—C4     | 115.0 (10) | C10—C18—H182  | 108.6      |
| C6—C5—H51    | 122.5      | C19—C18—H182  | 108.6      |
| C4—C5—H51    | 122.5      | H181—C18—H182 | 107.6      |
| C5—C6—C7     | 125.3 (10) | C20—C19—C18   | 112.0 (14) |
| C5—C6—N2     | 117.5 (10) | C20—C19—H191  | 109.2      |
| C7—C6—N2     | 117.2 (10) | C18—C19—H191  | 109.2      |
| C6—C7—C2     | 117.5 (11) | C20—C19—H192  | 109.2      |
| C6—C7—H71    | 121.2      | C18—C19—H192  | 109.2      |
| C2—C7—H71    | 121.2      | H191—C19—H192 | 107.9      |
| O2—C8—C9     | 110.3 (10) | C19—C20—C21   | 118 (2)    |
| O2—C8—H81    | 109.6      | C19—C20—H201  | 107.8      |
| C9—C8—H81    | 109.6      | C21—C20—H201  | 107.8      |
| O2—C8—H82    | 109.6      | C19—C20—H202  | 107.8      |
| C9—C8—H82    | 109.6      | C21—C20—H202  | 107.8      |
| H81—C8—H82   | 108.1      | H201—C20—H202 | 107.1      |
| C11—C12—C13  | 104.7 (10) | C20—C21—H211  | 109.5      |
| C11—C12—C17  | 115.6 (12) | C20—C21—H212  | 109.5      |
| C13—C12—C17  | 111.8 (12) | H211—C21—H212 | 109.5      |
| C11—C12—H121 | 108.2      | C20—C21—H213  | 109.5      |

## supporting information

|               |             |                 |             |
|---------------|-------------|-----------------|-------------|
| C13—C12—H121  | 108.2       | H211—C21—H213   | 109.5       |
| C17—C12—H121  | 108.2       | H212—C21—H213   | 109.5       |
| C14—C13—C9    | 111.3 (10)  | C18B—C10B—H10B  | 107.8       |
| C14—C13—C12   | 115.6 (11)  | C10B—C18B—C19B  | 114.8 (15)  |
| C9—C13—C12    | 105.6 (11)  | C10B—C18B—H18B  | 108.6       |
| C14—C13—H131  | 108.0       | C19B—C18B—H18B  | 108.6       |
| C9—C13—H131   | 108.0       | C10B—C18B—H19B  | 108.6       |
| C12—C13—H131  | 108.0       | C19B—C18B—H19B  | 108.6       |
| C15—C14—C13   | 111.5 (12)  | H18B—C18B—H19B  | 107.5       |
| C15—C14—H141  | 109.3       | C20B—C19B—C18B  | 112.1 (16)  |
| C13—C14—H141  | 109.3       | C20B—C19B—H20B  | 109.2       |
| C15—C14—H142  | 109.3       | C18B—C19B—H20B  | 109.2       |
| C13—C14—H142  | 109.3       | C20B—C19B—H21B  | 109.2       |
| H141—C14—H142 | 108.0       | C18B—C19B—H21B  | 109.2       |
| C16—C15—C14   | 120.3 (14)  | H20B—C19B—H21B  | 107.9       |
| C16—C15—H151  | 119.9       | C19B—C20B—C21B  | 118 (2)     |
| C14—C15—H151  | 119.9       | C19B—C20B—H22B  | 107.8       |
| C15—C16—C17   | 120.2 (13)  | C21B—C20B—H22B  | 107.8       |
| C15—C16—H161  | 119.9       | C19B—C20B—H23B  | 107.8       |
| C17—C16—H161  | 119.9       | C21B—C20B—H23B  | 107.8       |
| C16—C17—C12   | 109.4 (11)  | H22B—C20B—H23B  | 107.1       |
| C16—C17—H171  | 109.8       | C20B—C21B—H24B  | 109.5       |
| C12—C17—H171  | 109.8       | C20B—C21B—H25B  | 109.5       |
| C16—C17—H172  | 109.8       | H24B—C21B—H25B  | 109.5       |
| C12—C17—H172  | 109.8       | C20B—C21B—H26B  | 109.5       |
| H171—C17—H172 | 108.3       | H24B—C21B—H26B  | 109.5       |
| C8—C9—C13     | 111.3 (10)  | H25B—C21B—H26B  | 109.5       |
| C8—C9—C10     | 113.6 (10)  |                 |             |
| O1—C1—O2—C8   | 1.1 (15)    | C17—C12—C13—C9  | −128.2 (11) |
| C2—C1—O2—C8   | −178.0 (8)  | C9—C13—C14—C15  | 83.5 (14)   |
| O1—C1—C2—C3   | −6.8 (16)   | C12—C13—C14—C15 | −37.0 (16)  |
| O2—C1—C2—C3   | 172.3 (10)  | C13—C14—C15—C16 | 40.9 (18)   |
| O1—C1—C2—C7   | 170.7 (10)  | C14—C15—C16—C17 | 3 (2)       |
| O2—C1—C2—C7   | −10.2 (14)  | C15—C16—C17—C12 | −47.5 (18)  |
| C7—C2—C3—C4   | 0.2 (16)    | C11—C12—C17—C16 | −74.5 (15)  |
| C1—C2—C3—C4   | 177.7 (10)  | C13—C12—C17—C16 | 45.1 (15)   |
| C2—C3—C4—C5   | 1.2 (16)    | O2—C8—C9—C13    | −171.4 (9)  |
| C2—C3—C4—N1   | 179.8 (10)  | O2—C8—C9—C10    | 70.8 (13)   |
| O3—N1—C4—C3   | 14.6 (14)   | C14—C13—C9—C8   | 86.1 (13)   |
| O4—N1—C4—C3   | −167.3 (10) | C12—C13—C9—C8   | −147.7 (10) |
| O3—N1—C4—C5   | −166.7 (9)  | C14—C13—C9—C10  | −150.8 (11) |
| O4—N1—C4—C5   | 11.4 (14)   | C12—C13—C9—C10  | −24.6 (13)  |
| C3—C4—C5—C6   | −2.4 (14)   | C13—C12—C11—C10 | 29.4 (14)   |
| N1—C4—C5—C6   | 179.0 (9)   | C17—C12—C11—C10 | 152.9 (12)  |
| C4—C5—C6—C7   | 2.5 (15)    | C12—C11—C10—C18 | −169.6 (13) |
| C4—C5—C6—N2   | −178.4 (8)  | C12—C11—C10—C9  | −43.5 (14)  |
| O5—N2—C6—C5   | −4.6 (13)   | C8—C9—C10—C18   | −70.5 (16)  |
| O6—N2—C6—C5   | 175.9 (9)   | C13—C9—C10—C18  | 167.9 (14)  |
| O5—N2—C6—C7   | 174.6 (9)   | C8—C9—C10—C11   | 163.0 (11)  |
| O6—N2—C6—C7   | −4.8 (13)   | C13—C9—C10—C11  | 41.4 (13)   |

## supporting information

---

|                 |             |                     |             |
|-----------------|-------------|---------------------|-------------|
| C5—C6—C7—C2     | −1.2 (15)   | C11—C10—C18—C19     | −60 (2)     |
| N2—C6—C7—C2     | 179.6 (8)   | C9—C10—C18—C19      | −177.4 (19) |
| C3—C2—C7—C6     | −0.2 (15)   | C10—C18—C19—C20     | −164 (2)    |
| C1—C2—C7—C6     | −177.7 (10) | C18—C19—C20—C21     | 68 (4)      |
| C1—O2—C8—C9     | 173.8 (9)   | C9B—C10B—C18B—C19B  | 178 (2)     |
| C11—C12—C13—C14 | 121.2 (13)  | C10B—C18B—C19B—C20B | −76 (4)     |
| C17—C12—C13—C14 | −4.7 (16)   | C18B—C19B—C20B—C21B | −75 (10)    |
| C11—C12—C13—C9  | −2.3 (14)   |                     |             |

---

## References:

1. Bruker, 2014, *Bruker APEX2, SAINT-Plus and SADABS*, Bruker AXS Inc., Madison, Wisconsin, USA.
2. G. Sheldrick, *Acta Crystallogr.*, 2015, **A71**, 3.
3. G. Sheldrick, *Acta Crystallogr.*, 2015, **C71**, 3.
4. C. F. Macrae, I. J. Bruno, J. A. Chisholm, P. R. Edgington, P. McCabe, E. Pidcock, L. Rodriguez-Monge, R. Taylor, J. van de Streek and P. A. Wood, *J. Appl. Crystallogr.*, 2008, **41**, 466.
5. F. J. Liotta, G. Van Duyne and B. K. Carpenter *Organometallics*, 1987, **6**, 1010.
6. J. Aube;; S. Ghosh and M. Tanol *J. Am. Chem. Soc.*, 1994, **116**, 9009.
7. Y. Nagao, Y. Hagiwara, T. Tohjo, Y. Hasegawa, M. Ochiai and M. Shiro *J. Org. Chem.*, 1988, **53**, 5983.
